# Supplementary material for: Transcriptome Sequencing Revealed Significant Alteration of Cortical Promoter Usage and Splicing in Schizophrenia
Source: PLoS One. 2012 Apr 27;7(4):e36351. doi: 10.1371/journal.pone.0036351 (PMC3338678; doi:10.1371/journal.pone.0036351)
Supplement: Table S1 — Differentially expressed genes between schizophrenia cases and controls. (XLS) [file pone.0036351.s001.xls]

## Sheet: step2_SZintegr
Table S1. Differentially expressed genes (FDR<0.05) between schizophrenia cases and controls
Gene	Description	Locus	RPKM_ctrl	RPKM_case	p_value	Fold change
PLGLB1	plasminogen-like B2	chr2:86988586-87102486	18.4871	0.599577	0	-30.8336
NPAS4	neuronal PAS domain protein 4	chr11:65945050-65950753	225.179	11.915	0	-18.8988
PDSS1	"prenyl (decaprenyl) diphosphate synthase, subunit 1"	chr10:27026600-27189965	0.130361	0.0214585	0	-6.07503
MESTP1	mesoderm specific transcript homolog (mouse) pseudogene 1	chr6:129245978-129879401	4.42291	0.740528	0	-5.97264
NPBWR2	neuropeptides B/W receptor 2	chr20:62181931-62215047	6.29004	1.23396	0	-5.09744
DEPDC4	DEP domain containing 4	chr12:99117995-99184988	2.74534	0.693359	0	-3.95948
EGR4	early growth response 4	chr2:73371565-73374181	285.131	75.2832	0	-3.78745
FAM200A	"family with sequence similarity 200, member A"	chr7:98981866-98987693	0.0647942	0.017761	4.93798e-07	-3.64812
MTCP1	mature T-cell proliferation 1	chrX:153943090-154037972	3.1789	0.89778	0	-3.54085
PTGS2	prostaglandin-endoperoxide synthase 2 (prostaglandin G/H synthase and cyclooxygenase)	chr1:184907591-184916179	40.02	12.0165	0.000254771	-3.33042
CYR61	"cysteine-rich, angiogenic inducer, 61"	chr1:85819040-85821974	151.613	49.0633	6.46683e-12	-3.09015
BET1L	blocked early in transport 1 homolog (S. cerevisiae)-like	chr11:157783-197428	14.1816	4.61612	0	-3.07219
JUNB	jun B proto-oncogene	chr19:12763309-12765124	669.24	219.795	0	-3.04484
FOS	FBJ murine osteosarcoma viral oncogene homolog	chr14:74815283-74818685	403.471	132.927	0	-3.03528
NR4A1	"nuclear receptor subfamily 4, group A, member 1"	chr12:50718760-50739558	397.872	131.528	0	-3.025
ARC	activity-regulated cytoskeleton-associated protein	chr8:143689411-143692835	407.758	149.617	0	-2.72535
PLGLB2	plasminogen-like B2	chr2:87828720-87906586	7.63987	2.93792	0.00205727	-2.60044
C20orf201	chromosome 20 open reading frame 201	chr20:62181931-62215047	59.4818	23.2574	0	-2.55754
LBH	limb bud and heart development homolog (mouse)	chr2:30307898-30400100	0.250058	0.0988843	0	-2.52879
UTS2	urotensin 2	chr1:7753915-7836159	0.426548	0.169167	0	-2.52146
SPHAR	S-phase response (cyclin related)	chr1:227473293-227508261	0.0402661	0.0164431	0	-2.44881
GADD45G	"growth arrest and DNA-damage-inducible, gamma"	chr9:91409747-91411283	192.128	82.7526	1.49623e-10	-2.32172
CLDN22	claudin 22	chr4:184257439-184478924	0.0256532	0.0113786	1.27368e-09	-2.25451
DUSP1	dual specificity phosphatase 1	chr5:172127706-172130809	346.713	155.511	0	-2.22951
MSMP	"microseminoprotein, prostate associated"	chr9:35739339-35747908	0.0239173	0.0107939	0	-2.21582
TSSK1B	testis-specific serine kinase 1B	chr5:112385694-112852010	0.514304	0.23291	0.000908506	-2.20817
SIK1	salt-inducible kinase 1	chr21:43658829-43671436	44.5581	20.2661	0.00327681	-2.19865
FOSB	FBJ murine osteosarcoma viral oncogene homolog B	chr19:50663092-50670254	104.193	48.7329	1.19401e-05	-2.13804
CKS2	CDC28 protein kinase regulatory subunit 2	chr9:91115932-91121437	88.1725	41.4576	6.14287e-05	-2.12681
ANGPTL6	angiopoietin-like 6	chr19:10053361-10074472	3.09147	1.46199	2.35367e-14	-2.11456
PRKG1	"protein kinase, cGMP-dependent, type I"	chr10:52421123-53728116	18.0929	8.658	8.01121e-05	-2.08973
C10orf91	chromosome 10 open reading frame 91	chr10:133995647-134112902	0.782255	0.386811	5.15143e-14	-2.02232
BTG2	"BTG family, member 2"	chr1:201541286-201545348	97.2294	48.3356	7.1512e-05	-2.01155
GP1BB	"glycoprotein Ib (platelet), beta polypeptide"	chr22:18081986-18092297	182.456	91.8314	0	-1.98686
C11orf96	chromosome 11 open reading frame 96	chr11:43920715-43922008	169.285	86.3668	3.59305e-07	-1.96007
KIAA1328	KIAA1328	chr18:32630032-33059285	16.153	8.48803	9.39825e-07	-1.90303
PIGC	"phosphatidylinositol glycan anchor biosynthesis, class C"	chr1:170077260-170704590	106.521	56.6598	0	-1.88001
CDNF	cerebral dopamine neurotrophic factor	chr10:14901254-14953744	5.02331	2.67384	5.2934e-05	-1.87869
DUSP5	dual specificity phosphatase 5	chr10:112247614-112261291	70.6251	37.7828	0.00191274	-1.86924
A2LD1	AIG2-like domain 1	chr13:99539337-100039047	6.54953	3.59443	5.54646e-05	-1.82213
C9orf50	chromosome 9 open reading frame 50	chr9:131410983-131444265	4.29682	2.41213	4.44089e-16	-1.78134
MIR1307	microRNA 1307	chr10:105117713-105146213	0.0218399	0.0125406	0	-1.74154
GPX3	glutathione peroxidase 3 (plasma)	chr5:150380408-150387884	211.713	122.351	1.3756e-06	-1.73037
CHAC2	"ChaC, cation transport regulator homolog 2 (E. coli)"	chr2:53613313-53940801	9.32906	5.40574	0	-1.72577
CCDC152	coiled-coil domain containing 152	chr5:42792686-42844212	117.575	70.2144	1.36349e-06	-1.67451
PCSK1	proprotein convertase subtilisin/kexin type 1	chr5:95751874-95794708	144.043	86.8254	0.000194708	-1.659
VAMP1	vesicle-associated membrane protein 1 (synaptobrevin 1)	chr12:6431519-6450326	852.239	515.595	0	-1.65292
SYT2	synaptotagmin II	chr1:200826346-200946168	111.943	68.1226	0.000792379	-1.64326
SCN1B	"sodium channel, voltage-gated, type I, beta"	chr19:40213373-40223192	2344.33	1428.91	0	-1.64064
HAPLN4	hyaluronan and proteoglycan link protein 4	chr19:19226556-19245178	334.117	208.465	8.59608e-08	-1.60275
FMO5	flavin containing monooxygenase 5	chr1:145124461-145163569	4.25703	2.68678	5.14309e-05	-1.58444
SNORA40	"small nucleolar RNA, H/ACA box 40"	chr11:93034524-93114308	25.4116	16.0993	0	-1.57843
RGS2	"regulator of G-protein signaling 2, 24kDa"	chr1:191044793-191048026	364.976	231.448	5.93946e-08	-1.57692
TIMP4	TIMP metallopeptidase inhibitor 4	chr3:12020861-12208532	18.7888	11.9186	1.33227e-15	-1.57643
EXTL2	exostoses (multiple)-like 2	chr1:101110530-101134142	116.984	74.4839	0.00232792	-1.57059
SEMA7A	"semaphorin 7A, GPI membrane anchor (John Milton Hagen blood group)"	chr15:72489375-72513329	238.667	152.153	1.42838e-05	-1.5686
SULT1A2	"sulfotransferase family, cytosolic, 1A, phenol-preferring, member 2"	chr16:28510766-28542375	30.1889	19.5552	5.37051e-06	-1.54378
C3orf49	chromosome 3 open reading frame 49	chr3:63780111-63824527	3.67601	2.38409	6.89837e-06	-1.54189
SNORA18	"small nucleolar RNA, H/ACA box 18"	chr11:93034524-93114308	73.3713	47.5904	0	-1.54172
HES4	hairy and enhancer of split 4 (Drosophila)	chr1:924207-925333	234.253	154.362	5.73594e-05	-1.51756
EGR1	early growth response 1	chr5:137829079-137832903	425.441	280.933	6.72507e-08	-1.51439
HAS3	hyaluronan synthase 3	chr16:67697660-67723985	15.6131	10.3447	1.04307e-05	-1.50928
GAPDHP72	glyceraldehyde-3-phosphate dehydrogenase pseudogene 72	chr6:166397774-166398773	198.306	131.562	0.00026306	-1.50732
PCDHA4	protocadherin alpha 4	chr5:140154627-140372113	10.4913	7.00665	0.000947764	-1.49733
LYSMD4	"LysM, putative peptidoglycan-binding, domain containing 4"	chr15:97923711-98091172	56.0369	37.6838	3.29142e-06	-1.48703
SST	somatostatin	chr3:188869398-188870895	919.959	620.19	3.21965e-14	-1.48335
EVI2A	ecotropic viral integration site 2A	chr17:26446120-26728817	161.221	109.237	0	-1.47588
ANGPTL2	angiopoietin-like 2	chr9:128716873-129025264	35.6721	24.2492	0.00129238	-1.47106
PVALB	parvalbumin	chr22:35526673-35545463	1585.2	1089.2	0	-1.45538
HR	hairless homolog (mouse)	chr8:22027876-22045326	185.058	127.374	0.00117685	-1.45287
SERPIND1	"serpin peptidase inhibitor, clade D (heparin cofactor), member 1"	chr22:19391980-19543070	2.12657	1.47415	0	-1.44257
C2orf82	chromosome 2 open reading frame 82	chr2:233441967-233449360	327.309	227.484	2.52575e-05	-1.43882
CITED2	"Cbp/p300-interacting transactivator, with Glu/Asp-rich carboxy-terminal domain, 2"	chr6:139735088-139737478	252.886	176.038	0.00030006	-1.43654
CCDC36	coiled-coil domain containing 36	chr3:49042147-49270159	1.66553	1.16059	3.43725e-12	-1.43507
ASB13	ankyrin repeat and SOCS box-containing 13	chr10:5714922-5748532	172.063	120.597	0.00276746	-1.42676
RPL39P5	ribosomal protein L39 pseudogene 5 |RPL39_7_406 | 60S ribosomal protein L39 pseudogene 5	chr3:135553383-135576096	15.3047	10.789	2.085e-13	-1.41855
GAPDHP71	glyceraldehyde-3-phosphate dehydrogenase pseudogene 71	chr5:173872916-173873916	258.267	183.363	0.000389688	-1.4085
FA2H	fatty acid 2-hydroxylase	chr16:73304358-73366224	173.449	123.411	0.0038494	-1.40546
B3GNT8	"UDP-GlcNAc:betaGal beta-1,3-N-acetylglucosaminyltransferase 8"	chr19:46595543-46637654	2.25323	1.61513	8.78348e-06	-1.39508
CNDP1	carnosine dipeptidase 1 (metallopeptidase M20 family)	chr18:70352671-70403237	336.681	241.373	7.95128e-05	-1.39486
HCRTR1	hypocretin (orexin) receptor 1	chr1:31855887-31883064	5.00191	3.58947	8.20792e-07	-1.3935
TF	transferrin	chr3:134901900-134980540	1195.84	858.279	1.22569e-13	-1.3933
SNX15	sorting nexin 15	chr11:64538228-64564618	175.506	126.14	4.56046e-10	-1.39136
IGSF6	"immunoglobulin superfamily, member 6"	chr16:21518356-21576292	2.78249	2.0028	1.55208e-05	-1.3893
PLLP	plasmolipin	chr16:55847510-55876072	611.452	440.324	1.49614e-07	-1.38864
LRTM1	leucine-rich repeats and transmembrane domains 1	chr3:54131732-55083622	0.955489	0.690264	3.41956e-05	-1.38424
SCRT1	"scratch homolog 1, zinc finger protein (Drosophila)"	chr8:145525261-145530751	423.223	306.099	1.5741e-05	-1.38263
PIGH	"phosphatidylinositol glycan anchor biosynthesis, class H"	chr14:67069760-67136770	111.346	80.5984	1.05045e-07	-1.38149
ANKRD9	ankyrin repeat domain 9	chr14:102042950-102045881	275.959	200.027	0.000529437	-1.37961
TMEM160	transmembrane protein 160	chr19:52241007-52243722	1254.49	910.181	1.72085e-13	-1.37829
LAPTM4B	lysosomal protein transmembrane 4 beta	chr8:98856984-98934002	246.758	180.137	0.00132222	-1.36984
GRIN3B	"glutamate receptor, ionotropic, N-methyl-D-aspartate 3B"	chr19:951436-972141	0.485818	0.35602	0.00011182	-1.36458
PCP4	Purkinje cell protein 4	chr21:40161216-40223190	1316.87	970.022	6.49925e-13	-1.35757
C5orf13	chromosome 5 open reading frame 13	chr5:111092407-111137815	548.989	404.892	3.35868e-06	-1.35589
SH3BGRL	SH3 domain binding glutamic acid-rich protein like	chrX:80344277-80440698	332.533	245.491	0.000312308	-1.35456
C18orf32	chromosome 18 open reading frame 32	chr18:45262026-45267602	592.465	437.451	1.54485e-06	-1.35436
ELOVL1	"elongation of very long chain fatty acids (FEN1/Elo2, SUR4/Elo3, yeast)-like 1"	chr1:43601659-43606286	358.387	264.843	0.000189351	-1.35321
EVC	Ellis van Creveld syndrome	chr4:5763824-5945686	2.65901	1.96536	0.000324897	-1.35294
C1QTNF4	C1q and tumor necrosis factor related protein 4	chr11:47567791-47572537	1126.94	835.413	5.5113e-11	-1.34896
RASD2	"RASD family, member 2"	chr22:34267295-34279987	353.758	264.153	0.000328237	-1.33922
GABRD	"gamma-aminobutyric acid (GABA) A receptor, delta"	chr1:1940702-1952050	1036.2	773.939	8.12426e-10	-1.33887
CHRNE	"cholinergic receptor, nicotinic, epsilon"	chr17:4728436-4747148	4.89186	3.65653	3.99553e-08	-1.33784
VGF	VGF nerve growth factor inducible	chr7:100592516-100595594	1012.89	757.464	1.45443e-09	-1.33721
SLC25A5	"solute carrier family 25 (mitochondrial carrier; adenine nucleotide translocator), member 5"	chrX:118486435-118489310	1095.19	819.616	3.48307e-10	-1.33622
SCN4B	"sodium channel, voltage-gated, type IV, beta"	chr11:117509301-117528747	253.17	189.487	0.00255884	-1.33608
LNP1	leukemia NUP98 fusion partner 1	chr3:101564998-101657859	50.1738	37.592	0.000421492	-1.33469
LANCL1	LanC lantibiotic synthetase component C-like 1 (bacterial)	chr2:211004222-211049676	342.478	257.162	0.00051627	-1.33176
INA	"internexin neuronal intermediate filament protein, alpha"	chr10:105026909-105040091	853.057	643.326	6.52341e-08	-1.32601
UGP2	UDP-glucose pyrophosphorylase 2	chr2:63921601-63972196	739.172	559.104	6.42388e-07	-1.32207
RCAN2	regulator of calcineurin 2	chr6:46296427-46567668	748.028	566.556	6.07651e-07	-1.32031
FAM71E1	"family with sequence similarity 71, member E1"	chr19:55627971-55678419	81.572	61.7863	9.35281e-08	-1.32023
CLDN11	claudin 11	chr3:171619358-171634577	332.825	252.274	0.000901935	-1.3193
GDF1	growth differentiation factor 1	chr19:18840360-18867953	668.281	506.786	2.65109e-06	-1.31867
FGD2	"FYVE, RhoGEF and PH domain containing 2"	chr6:37043895-37167595	3.17945	2.41584	0	-1.31608
NDUFA11	"NADH dehydrogenase (ubiquinone) 1 alpha subcomplex, 11, 14.7kDa"	chr19:5817181-5855025	1.59241	1.21079	0.000583415	-1.31518
CXCL14	chemokine (C-X-C motif) ligand 14	chr5:134934273-134942868	540.359	411.846	3.29704e-05	-1.31204
KANK3	KN motif and ankyrin repeat domains 3	chr19:7929457-8459885	30.5278	23.2893	4.88498e-15	-1.31081
COX5A	cytochrome c oxidase subunit Va	chr15:72999671-73017438	1713.84	1311.98	3.24185e-13	-1.3063
ZNF385A	zinc finger protein 385A	chr12:53049185-53071332	491.035	376.171	0.000102523	-1.30535
NDUFB4	"NADH dehydrogenase (ubiquinone) 1 beta subcomplex, 4, 15kDa"	chr3:121797817-121803863	955.055	731.678	5.8636e-08	-1.30529
NCALD	neurocalcin delta	chr8:102767946-103206311	840.531	643.958	3.64359e-07	-1.30526
JUND	jun D proto-oncogene	chr19:18252250-18253294	1311.29	1004.92	2.19486e-10	-1.30487
HIGD2A	"HIG1 hypoxia inducible domain family, member 2A"	chr5:175748378-175749366	667.885	512.042	6.08029e-06	-1.30436
FNDC4	fibronectin type III domain containing 4	chr2:27568254-27571590	533.657	409.29	5.38595e-05	-1.30386
MAG	myelin associated glycoprotein	chr19:40474867-40496547	815.548	626.296	6.70938e-07	-1.30218
HES6	hairy and enhancer of split 6 (Drosophila)	chr2:238811648-238813421	308.329	236.832	0.00230694	-1.30189
SEC61G	Sec61 gamma subunit	chr7:54787437-54794439	377.864	290.401	0.000742204	-1.30118
NDUFS4	"NADH dehydrogenase (ubiquinone) Fe-S protein 4, 18kDa (NADH-coenzyme Q reductase)"	chr5:52892241-53014922	457.935	352.306	0.00021537	-1.29982
GNG13	"guanine nucleotide binding protein (G protein), gamma 13"	chr16:774975-790734	96.0284	73.9192	8.99232e-05	-1.2991
SEZ6L2	seizure related 6 homolog (mouse)-like 2	chr16:29790331-29818074	951.593	733.267	1.14947e-07	-1.29774
DCLK1	doublecortin-like kinase 1	chr13:35243477-35603443	578.003	445.429	3.68015e-05	-1.29763
GAD1	"glutamate decarboxylase 1 (brain, 67kDa)"	chr2:171381445-171425900	352.419	271.716	0.00127682	-1.29701
CCNI	cyclin I	chr4:78188202-78216152	1285.64	993.416	1.03271e-09	-1.29416
BRP44L	brain protein 44-like	chr6:166698399-166716476	454.825	351.841	0.000316092	-1.2927
ATP1B3	"ATPase, Na+/K+ transporting, beta 3 polypeptide"	chr3:143078159-143128072	317.917	245.987	0.00252115	-1.29241
RTN4R	reticulon 4 receptor	chr22:18608937-18635838	478.891	370.72	0.000214942	-1.29179
TCTE1	t-complex-associated-testis-expressed 1	chr6:44346457-44454672	11.743	9.1327	0.000173612	-1.28582
NECAB3	N-terminal EF-hand calcium binding protein 3	chr20:31708554-31725925	370.811	288.67	0.00139414	-1.28455
ASTE1	asteroid homolog 1 (Drosophila)	chr3:132096123-132228336	14.0919	10.983	0.0023128	-1.28306
EPHB6	EPH receptor B6	chr7:142262913-142278967	626.665	488.543	3.7014e-05	-1.28272
RIMS3	regulating synaptic membrane exocytosis 3	chr1:40858938-40903915	544.492	425.131	0.000131599	-1.28076
RPH3A	rabphilin 3A homolog (mouse)	chr12:111714124-111819627	488.962	381.923	0.00029699	-1.28026
NDUFC1	"NADH dehydrogenase (ubiquinone) 1, subcomplex unknown, 1, 6kDa"	chr4:140430520-140531972	675.683	529.172	4.10605e-07	-1.27687
SNX17	sorting nexin 17	chr2:27446892-27453498	456.64	357.946	0.000561782	-1.27572
UBL7	ubiquitin-like 7 (bone marrow stromal cell-derived)	chr15:72525370-72540576	580.391	455.281	0.000105437	-1.2748
GMPPB	GDP-mannose pyrophosphorylase B	chr3:49701973-49736388	20.9659	16.4515	0.000447483	-1.27441
MAGED2	"melanoma antigen family D, 2"	chrX:54850756-54859170	663.35	520.918	3.64755e-05	-1.27342
GPER	G protein-coupled estrogen receptor 1	chr7:1003167-1144419	44.9014	35.2648	0.000265721	-1.27326
FBXO9	F-box protein 9	chr6:53037754-53073630	346.853	272.723	0.00315761	-1.27181
MGAT5B	"mannosyl (alpha-1,6-)-glycoprotein beta-1,6-N-acetyl-glucosaminyltransferase, isozyme B"	chr17:72376132-72458060	416.602	327.984	0.00120299	-1.27019
ATP5A1	"ATP synthase, H+ transporting, mitochondrial F1 complex, alpha subunit 1, cardiac muscle"	chr18:41918107-41938197	2350.52	1856.16	2.86438e-14	-1.26633
LRP3	low density lipoprotein receptor-related protein 3	chr19:38377329-38390383	664.261	524.904	5.53356e-05	-1.26549
METRN	"meteorin, glial cell differentiation regulator"	chr16:705173-707479	873.679	690.563	3.8505e-06	-1.26517
TRIM37	tripartite motif-containing 37	chr17:54188230-54539011	310.444	247.321	0.00332404	-1.25523
PTPRN	"protein tyrosine phosphatase, receptor type, N"	chr2:219862588-219882464	933.13	744.117	4.11702e-06	-1.25401
NUDT22	nudix (nucleoside diphosphate linked moiety X)-type motif 22	chr11:63750337-63758326	140.754	112.312	0.00361834	-1.25324
ATP5C1	"ATP synthase, H+ transporting, mitochondrial F1 complex, gamma polypeptide 1"	chr10:7870098-7889764	797.496	637.481	2.54426e-05	-1.25101
DAZAP2	DAZ associated protein 2	chr12:49918876-49923833	563.586	450.97	0.000418287	-1.24972
OMG	oligodendrocyte myelin glycoprotein	chr17:26446120-26728817	392.865	314.801	1.97199e-05	-1.24798
NDUFA4	"NADH dehydrogenase (ubiquinone) 1 alpha subcomplex, 4, 9kDa"	chr7:10939608-10946305	3092.06	2480.27	2.22045e-16	-1.24666
GLA	"galactosidase, alpha"	chrX:100532632-100555762	51.1068	41.0444	4.03965e-05	-1.24516
INF2	"inverted formin, FH2 and WH2 domain containing"	chr14:104226987-104256992	506.85	407.069	0.0010498	-1.24512
SRP9	signal recognition particle 9kDa	chr1:224032153-224044788	450.701	362.91	0.00213633	-1.24191
MIR564	microRNA 564	chr3:44878383-44882156	49.1951	39.6207	0	-1.24165
RGS4	regulator of G-protein signaling 4	chr1:161305558-161313216	1250.1	1006.81	3.31093e-07	-1.24164
FBN3	fibrillin 3	chr19:7929457-8459885	2.11209	1.70105	0.000689695	-1.24164
NDUFA5	"NADH dehydrogenase (ubiquinone) 1 alpha subcomplex, 5, 13kDa"	chr7:122968318-122985194	439.093	354.701	0.00279501	-1.23792
ABTB1	ankyrin repeat and BTB (POZ) domain containing 1	chr3:128830728-128882452	416.562	336.896	8.24942e-07	-1.23647
ATP5D	"ATP synthase, H+ transporting, mitochondrial F1 complex, delta subunit"	chr19:1192748-1195823	1891.06	1529.77	7.88359e-10	-1.23617
KCNF1	"potassium voltage-gated channel, subfamily F, member 1"	chr2:10969513-10971801	572.548	463.494	0.000720155	-1.23529
TONSL	"tonsoku-like, DNA repair protein"	chr8:145624998-145703357	10.4801	8.48729	2.08075e-05	-1.2348
NEFH	"neurofilament, heavy polypeptide"	chr22:28206218-28217275	810.082	656.8	8.64384e-05	-1.23338
FSCN1	"fascin homolog 1, actin-bundling protein (Strongylocentrotus purpuratus)"	chr7:5598979-5612811	735.892	596.754	0.000142105	-1.23316
TREX1	three prime repair exonuclease 1	chr3:48463140-48516665	54.3732	44.0937	0.00152632	-1.23313
ATP5G3	"ATP synthase, H+ transporting, mitochondrial Fo complex, subunit C3 (subunit 9)"	chr2:175749236-175754736	1564.91	1269.59	3.4529e-08	-1.23261
SLC15A3	"solute carrier family 15, member 3"	chr11:60448488-60475833	22.2921	18.0942	6.97516e-06	-1.232
COX8A	cytochrome c oxidase subunit VIIIA (ubiquitous)	chr11:63498654-63500590	2597.69	2112.31	1.66667e-12	-1.22979
CD74	"CD74 molecule, major histocompatibility complex, class II invariant chain"	chr5:149761398-149772525	592.705	481.989	0.00076034	-1.22971
SYT3	synaptotagmin III	chr19:55817047-55914519	197.087	160.384	0.000417237	-1.22884
ZYX	zyxin	chr7:142788294-142798326	545.33	444.288	0.00136839	-1.22742
C17orf107	chromosome 17 open reading frame 107	chr17:4728436-4747148	26.1079	21.2811	0.000565846	-1.22681
MAP1LC3B	microtubule-associated protein 1 light chain 3 beta	chr16:85983319-85995870	584.895	476.786	0.000925876	-1.22675
NCKIPSD	NCK interacting protein with SH3 domain	chr3:48637834-48698338	349.911	285.392	0.00161843	-1.22607
CTSD	cathepsin D	chr11:1730560-1741798	1870.61	1525.84	3.51172e-09	-1.22595
CACNG7	"calcium channel, voltage-dependent, gamma subunit 7"	chr19:59104400-59139007	565.015	460.958	0.00126096	-1.22574
EIF1B	eukaryotic translation initiation factor 1B	chr3:40326176-40328919	626.134	510.917	0.000647369	-1.22551
EGFL7	"EGF-like-domain, multiple 7"	chr9:138673128-138686951	547.017	446.603	0.00147865	-1.22484
CD68	CD68 molecule	chr17:7393098-7426152	3.40524	2.78345	5.27539e-07	-1.22339
UBE2QL1	ubiquitin-conjugating enzyme E2Q family-like 1	chr5:6502087-6545705	967.63	791.464	2.75017e-05	-1.22258
RNASE1	"ribonuclease, RNase A family, 1 (pancreatic)"	chr14:20339354-20340876	1559.2	1276.88	1.22669e-07	-1.2211
MORF4	mortality factor 4	chr15:76952226-76977127	866.305	709.589	8.14783e-05	-1.22085
CTSF	cathepsin F	chr11:66087511-66092623	667.678	547.635	0.000586428	-1.2192
CLTC	"clathrin, heavy chain (Hc)"	chr17:55051831-55129099	473.556	388.552	0.00384826	-1.21877
ATP1A1OS	ATP1A1 opposite strand	chr1:116717404-116762720	5.84821	4.80064	0	-1.21821
NGEF	neuronal guanine nucleotide exchange factor	chr2:233451664-233588839	1363.29	1119.82	1.07707e-06	-1.21742
CACNB1	"calcium channel, voltage-dependent, beta 1 subunit"	chr17:34583234-34607428	502.888	413.498	0.00319644	-1.21618
ATP1A1	"ATPase, Na+/K+ transporting, alpha 1 polypeptide"	chr1:116717404-116762720	3309.23	2724.61	5.61773e-14	-1.21457
APOM	apolipoprotein M	chr6:31714783-31733965	12.7064	10.4762	1.56863e-09	-1.21288
SCAND1	SCAN domain containing 1	chr20:34004959-34010808	587.217	484.259	0.00173751	-1.21261
ANGPTL4	angiopoietin-like 4	chr19:7929457-8459885	58.8515	48.7956	4.55358e-11	-1.20608
IL18BP	interleukin 18 binding protein	chr11:71387234-71469221	33.1661	27.5035	4.15312e-06	-1.20589
CHGA	chromogranin A (parathyroid secretory protein 1)	chr14:92459197-92471389	2445.22	2028.67	5.61158e-10	-1.20533
LGI3	"leucine-rich repeat LGI family, member 3"	chr8:22060289-22070290	803.754	667.397	0.000385275	-1.20431
PPP3CA	"protein phosphatase 3, catalytic subunit, alpha isozyme"	chr4:102163609-102487376	666.992	554.688	0.00133427	-1.20246
H2AFZ	"H2A histone family, member Z"	chr4:101088264-101090535	683.715	569.03	0.00121359	-1.20154
ACAT2	acetyl-CoA acetyltransferase 2	chr6:160103042-160130725	219.923	183.077	0.000205416	-1.20126
PSMB3	"proteasome (prosome, macropain) subunit, beta type, 3"	chr17:34162527-34174003	649.245	540.586	0.00165685	-1.201
FBXL15	F-box and leucine-rich repeat protein 15	chr10:104152365-104172883	371.071	309.112	2.22045e-16	-1.20044
C17orf95	chromosome 17 open reading frame 95	chr17:72234534-72245007	69.6693	58.1374	0.000227016	-1.19836
PRKACA	"protein kinase, cAMP-dependent, catalytic, alpha"	chr19:14063508-14089559	617.313	515.203	0.00244644	-1.19819
NRSN2	neurensin 2	chr20:275667-283512	1295.6	1081.48	1.16951e-05	-1.19799
PPIL1	peptidylprolyl isomerase (cyclophilin)-like 1	chr6:36930585-37004718	122.045	101.888	0.00162207	-1.19783
GIPC3	"GIPC PDZ domain containing family, member 3"	chr19:3441823-3723219	0.953146	0.795806	1.77636e-15	-1.19771
STMN3	stathmin-like 3	chr20:61741504-61755226	907.171	757.96	2.00446e-05	-1.19686
NDUFAB1	"NADH dehydrogenase (ubiquinone) 1, alpha/beta subcomplex, 1, 8kDa"	chr16:23499837-23515140	875.191	731.594	0.000346844	-1.19628
CD52	CD52 molecule	chr1:26481359-26519600	38.1821	31.9263	0.000430516	-1.19595
MICAL2	"microtubule associated monoxygenase, calponin and LIM domain containing 2"	chr11:12088713-12241903	571.683	478.028	0.00389188	-1.19592
FAM127C	"family with sequence similarity 127, member C"	chrX:133982208-134013871	48.4566	40.5777	1.33991e-07	-1.19417
BAALC	"brain and acute leukemia, cytoplasmic"	chr8:104222096-104380152	906.943	759.739	0.000308465	-1.19376
ATP5B	"ATP synthase, H+ transporting, mitochondrial F1 complex, beta polypeptide"	chr12:55318229-55326119	3779.06	3167.41	2.31593e-13	-1.19311
OLIG1	oligodendrocyte transcription factor 1	chr21:33364319-33366596	624.395	523.444	0.00292733	-1.19286
DSTN	destrin (actin depolymerizing factor)	chr20:17498598-17536652	1090.05	915.01	9.46074e-05	-1.1913
PFKM	"phosphofructokinase, muscle"	chr12:46787423-46826154	604.353	507.319	0.00365498	-1.19127
SPP1	secreted phosphoprotein 1	chr4:89115825-89123586	609.324	511.497	0.00352348	-1.19126
C1orf122	chromosome 1 open reading frame 122	chr1:38032360-38047713	755.245	634.246	3.75e-05	-1.19078
PPT1	palmitoyl-protein thioesterase 1	chr1:40310971-40335555	630.851	529.976	0.00340258	-1.19034
NDRG3	NDRG family member 3	chr20:34713582-34807895	713.527	599.483	0.00168112	-1.19024
UQCRFS1	"ubiquinol-cytochrome c reductase, Rieske iron-sulfur polypeptide 1"	chr19:34390136-34395883	673.417	566.54	0.00243422	-1.18865
RBFOX3	"RNA binding protein, fox-1 homolog (C. elegans) 3"	chr17:74597021-74990275	680.362	572.386	0.00231222	-1.18864
QDPR	quinoid dihydropteridine reductase	chr4:17097120-17122811	2177.52	1831.97	5.02502e-08	-1.18862
NAT8L	"N-acetyltransferase 8-like (GCN5-related, putative)"	chr4:2031384-2037433	724.725	610.016	0.00171337	-1.18804
ATP13A2	ATPase type 13A2	chr1:17185039-17211010	629.92	530.754	0.00365589	-1.18684
ATP2B2	"ATPase, Ca++ transporting, plasma membrane 2"	chr3:10340706-10724716	647.365	545.875	0.00338728	-1.18592
C9orf16	chromosome 9 open reading frame 16	chr9:129962359-129966028	2146.96	1812.55	1.10857e-07	-1.1845
CLPTM1	cleft lip and palate associated transmembrane protein 1	chr19:50150476-50188438	775.667	655.067	0.00145014	-1.1841
TTYH1	tweety homolog 1 (Drosophila)	chr19:59618416-59639892	1513.15	1278.21	9.81934e-06	-1.1838
PTGDS	prostaglandin D2 synthase 21kDa (brain)	chr9:138991776-138996014	8875.69	7498.07	0	-1.18373
IGFBP7	insulin-like growth factor binding protein 7	chr4:57524292-57671308	391.105	330.686	0.000370044	-1.18271
RPLP0	"ribosomal protein, large, P0"	chr12:119118892-119123397	849.224	718.108	0.0009435	-1.18259
C16orf42	chromosome 16 open reading frame 42	chr16:1323654-1341876	434.904	368.061	4.86015e-06	-1.18161
GABARAPL2	GABA(A) receptor-associated protein-like 2	chr16:74157749-74169279	1227.47	1039.53	8.05876e-05	-1.18079
SNN	stannin	chr16:11669801-11744149	717.017	607.285	0.00153102	-1.18069
BAI2	brain-specific angiogenesis inhibitor 2	chr1:31965304-32002528	762.37	646.123	0.00198142	-1.17991
AATK	apoptosis-associated tyrosine kinase	chr17:76623545-76754467	361.377	306.302	0.00128333	-1.17981
COX7C	cytochrome c oxidase subunit VIIc	chr5:85949539-85952337	3504.53	2972.43	3.99836e-11	-1.17901
NHP2	NHP2 ribonucleoprotein homolog (yeast)	chr5:177509073-177513567	713.135	604.95	0.00296718	-1.17883
INPP5F	inositol polyphosphate-5-phosphatase F	chr10:121475586-121578648	759.077	644.622	0.00228767	-1.17755
GRINA	"glutamate receptor, ionotropic, N-methyl D-aspartate-associated protein 1 (glutamate binding)"	chr8:145136213-145139571	1749.53	1486.5	3.86521e-06	-1.17695
CD99L2	CD99 molecule-like 2	chrX:149685469-149817837	848.063	720.593	0.00130909	-1.1769
C1orf85	chromosome 1 open reading frame 85	chr1:154485640-154532087	70.9101	60.3223	0.00187443	-1.17552
SPCS1	signal peptidase complex subunit 1 homolog (S. cerevisiae)	chr3:52694975-52717249	428.013	364.467	0.00077778	-1.17435
RPL15	ribosomal protein L15	chr3:23933642-23937334	1943.8	1656.48	2.2189e-06	-1.17345
CPLX1	complexin 1	chr4:768745-809945	1973.65	1682.13	1.46248e-06	-1.1733
KLC2	kinesin light chain 2	chr11:65777734-65801539	764.605	652.052	0.000149655	-1.17261
CLDND1	claudin domain containing 1	chr3:99717007-99724600	774.568	662.062	0.00303028	-1.16993
TSC22D1	"TSC22 domain family, member 1"	chr13:43905660-44048701	2232.31	1908.19	4.99806e-07	-1.16986
REEP5	receptor accessory protein 5	chr5:112239979-112285930	801.834	685.837	0.00237893	-1.16913
APEX1	APEX nuclease (multifunctional DNA repair enzyme) 1	chr14:19985055-20015086	434.879	372.26	0.00134829	-1.16821
NAPA	"N-ethylmaleimide-sensitive factor attachment protein, alpha"	chr19:52682702-52710309	1491	1276.52	4.64178e-05	-1.16802
LINGO1	leucine rich repeat and Ig domain containing 1	chr15:75693423-75711887	1070.52	917.361	0.000599672	-1.16696
NSF	N-ethylmaleimide-sensitive factor	chr17:42023390-42190000	912.041	782.303	0.00128691	-1.16584
CNP	"2',3'-cyclic nucleotide 3' phosphodiesterase"	chr17:37372284-37459533	2085.82	1790.15	2.49895e-07	-1.16516
MYL12B	"myosin, light chain 12B, regulatory"	chr18:3252134-3268282	1074.93	922.882	0.000679645	-1.16475
SLC25A3	"solute carrier family 25 (mitochondrial carrier; phosphate carrier), member 3"	chr12:97511533-97519906	1499.3	1288.33	6.57439e-05	-1.16375
OSGEP	O-sialoglycoprotein endopeptidase	chr14:19985055-20015086	106.185	91.2552	0.00289817	-1.1636
GOT1	"glutamic-oxaloacetic transaminase 1, soluble (aspartate aminotransferase 1)"	chr10:101146617-101180336	1490.86	1282.12	7.49073e-05	-1.16281
ALDOAP2	aldolase A, fructose-bisphosphate pseudogene 2	chr10:127334458-127361665	1430.59	1230.67	0.000108067	-1.16245
MT2A	metallothionein 2A	chr16:55199999-55200909	1094.85	941.92	0.000710759	-1.16236
CCK	cholecystokinin	chr3:42274320-42282666	3154.76	2718.24	1.2992e-08	-1.16059
SCAMP5	secretory carrier membrane protein 5	chr15:73074953-73100889	1647.69	1423.86	5.45779e-05	-1.1572
REEP2	receptor accessory protein 2	chr5:137802635-137810552	1149.39	994.114	0.000805477	-1.1562
ZNF358	zinc finger protein 358	chr19:7487003-7491912	1067.24	923.062	0.00125646	-1.1562
SYNGR3	synaptogyrin 3	chr16:1979968-1984276	1048.92	907.568	0.00140869	-1.15575
CALM2	"calmodulin 1 (phosphorylase kinase, delta)"	chr2:47240808-47257154	6968.65	6036.26	2.22045e-16	-1.15446
CD320	CD320 molecule	chr19:7929457-8459885	279.474	242.088	4.20997e-13	-1.15443
TADA3	transcriptional adaptor 3	chr3:9796657-9853037	364.745	315.979	0.00185402	-1.15433
TTC9B	tetratricopeptide repeat domain 9B	chr19:45413804-45416146	1459.32	1264.74	0.000195497	-1.15385
USMG5	up-regulated during skeletal muscle growth 5 homolog (mouse)	chr10:105117713-105146213	1268.47	1099.35	0.000342528	-1.15384
MRPL54	mitochondrial ribosomal protein L54	chr19:3441823-3723219	406.142	352.152	0	-1.15331
PIP5K1C	"phosphatidylinositol-4-phosphate 5-kinase, type I, gamma"	chr19:3441823-3723219	513.147	445.267	0.00275695	-1.15245
GZF1	GDNF-inducible zinc finger protein 1	chr20:23290818-23350081	48.8332	42.4393	0.00111638	-1.15066
NDUFS7	"NADH dehydrogenase (ubiquinone) Fe-S protein 7, 20kDa (NADH-coenzyme Q reductase)"	chr19:1334905-1346583	958.429	833.515	0.00331243	-1.14986
SERPINI1	"serpin peptidase inhibitor, clade I (neuroserpin), member 1"	chr3:168936216-169026048	1120.24	974.276	0.0014383	-1.14982
ATP6V0A1	"ATPase, H+ transporting, lysosomal V0 subunit a1"	chr17:37864387-37928122	1103.83	960.448	0.00161451	-1.14929
GNG3	"guanine nucleotide binding protein (G protein), gamma 3"	chr11:62214322-62233562	4455.32	3877.09	0	-1.14914
PSMD8	"proteasome (prosome, macropain) 26S subunit, non-ATPase, 8"	chr19:43557015-43566304	955.938	832.695	0.00376776	-1.148
MATR3	matrin 3	chr5:138637690-138695259	1045.37	912.504	0.00278781	-1.14561
ITM2B	integral membrane protein 2B	chr13:47705308-47734226	1666.47	1454.86	0.000183719	-1.14545
SH3GL2	SH3-domain GRB2-like 2	chr9:17569193-17787118	996.994	870.496	0.00344466	-1.14532
MLF2	myeloid leukemia factor 2	chr12:6727430-6732530	2426.6	2119.11	5.18297e-06	-1.1451
ANAPC10P1	ANAPC10P | anaphase promoting complex subunit 10 pseudogene | anaphase promoting complex subunit 10 pseudogene 1	chr1:52380633-52584946	18.4914	16.1545	0.00092725	-1.14466
CLIP3	CAP-GLY domain containing linker protein 3	chr19:41197401-41215635	2036.39	1780.15	3.40349e-05	-1.14394
KIFC2	kinesin family member C2	chr8:145624998-145703357	864.33	755.938	0.00150144	-1.14339
TMEM59L	transmembrane protein 59-like	chr19:18584681-18592841	3301.43	2892.96	2.14663e-07	-1.14119
PPP1R16A	"protein phosphatase 1, regulatory (inhibitor) subunit 16A"	chr8:145624998-145703357	151.006	132.338	0.0006129	-1.14106
C11orf49	chromosome 11 open reading frame 49	chr11:46914826-47154995	485.739	425.773	0.00240872	-1.14084
HMG20B	high-mobility group 20B	chr19:3441823-3723219	96.5925	84.6971	7.9658e-08	-1.14045
NDUFB11	"NADH dehydrogenase (ubiquinone) 1 beta subcomplex, 11, 17.3kDa"	chrX:46886558-46931156	810.526	713.369	0.00125351	-1.13619
ATP6V1B2	"ATPase, H+ transporting, lysosomal 56/58kDa, V1 subunit B2"	chr8:20098983-20123485	1341.59	1182.82	0.00158967	-1.13423
KCNAB2	"potassium voltage-gated channel, shaker-related subfamily, beta member 2"	chr1:5845456-6083840	1150.78	1014.84	0.0030091	-1.13395
FUZ	fuzzy homolog (Drosophila)	chr19:54961991-55008339	135.235	119.3	0.00145697	-1.13357
SLC25A11	"solute carrier family 25 (mitochondrial carrier; oxoglutarate carrier), member 11"	chr17:4781348-4789260	665.265	587.289	0.00215848	-1.13277
NRGN	"neurogranin (protein kinase C substrate, RC3)"	chr11:124114951-124122309	23239.4	20550	0	-1.13087
ANXA6	annexin A6	chr5:150460460-150517565	1742.21	1540.68	0.000476627	-1.13081
NELF	nasal embryonic LHRH factor	chr9:139461842-139473592	1698.39	1502.06	0.000532795	-1.13071
SNORA8	"small nucleolar RNA, H/ACA box 8"	chr11:93034524-93114308	291.878	258.6	2.51025e-07	-1.12869
NEFL	"neurofilament, light polypeptide"	chr8:24864384-24870541	2024.72	1797.18	0.000235919	-1.12661
SH3BGRL3	SH3 domain binding glutamic acid-rich protein like 3	chr1:26478832-26480599	1399.41	1243.16	0.00238388	-1.12569
RAB1B	"RAB1B, member RAS oncogene family"	chr11:65777734-65801539	698.088	620.388	0.000573729	-1.12524
NPDC1	"neural proliferation, differentiation and control, 1"	chr9:139053745-139060476	1598.57	1421.11	0.00124889	-1.12487
ESRRA	estrogen-related receptor alpha	chr11:63824438-63845858	163.467	145.389	0.00195926	-1.12434
HEPN1	HEPACAM opposite strand 1	chr11:124294357-124311518	739.54	657.783	1.40914e-11	-1.12429
HSPB2	heat shock 27kDa protein 2	chr11:111284559-111290026	64.556	57.5326	1.71507e-05	-1.12208
KLHDC3	kelch domain containing 3	chr6:43089954-43097010	2019.74	1803.04	0.000468135	-1.12019
UQCRH	ubiquinol-cytochrome c reductase hinge protein	chr1:46541956-46555032	1826.13	1631.88	0.000961635	-1.11903
RPS21	ribosomal protein S21	chr20:60395499-60396971	1619.68	1449.39	0.00238038	-1.11749
SYT1	synaptotagmin I	chr12:77781903-78369917	1847.45	1653.29	0.00103866	-1.11744
ATP5EP2	ATP synthase, H+ transporting, mitochondrial F1 complex, epsilon subunit pseudogene 2	chr13:27417393-27417713	1438.53	1288.35	0.00404812	-1.11657
NNAT	neuronatin	chr20:35579232-35589717	1230	1102.18	5.63953e-05	-1.11597
C5orf45	chromosome 5 open reading frame 45	chr5:179180502-179218446	88.5872	79.4498	0.000385238	-1.11501
RPS5	ribosomal protein S5	chr19:63590447-63597982	1649.92	1479.88	0.00238289	-1.1149
SURF1	surfeit 1	chr9:135204889-135232791	289.442	259.995	0.000597127	-1.11326
COX7A2	cytochrome c oxidase subunit VIIa polypeptide 2 (liver)	chr6:76004110-76051221	2415.97	2171.66	1.52599e-09	-1.1125
HINT1	histidine triad nucleotide binding protein 1	chr5:130522775-130528935	2536.53	2280.85	0.000231369	-1.1121
MAP1LC3A	microtubule-associated protein 1 light chain 3 alpha	chr20:32598352-32611810	2420.08	2177.83	0.000357307	-1.11123
NDUFAF3	"NADH dehydrogenase (ubiquinone) 1 alpha subcomplex, assembly factor 3"	chr3:49019695-49035926	806.766	726.122	0.000930871	-1.11106
NDUFB2	"NADH dehydrogenase (ubiquinone) 1 beta subcomplex, 2, 8kDa"	chr7:140042949-140052911	2064.53	1859.49	0.00106919	-1.11027
ABHD12	abhydrolase domain containing 12	chr20:25176705-25319477	867.616	781.639	0.00122722	-1.11
PFN2	profilin 2	chr3:151165383-151171431	1821.25	1642.45	0.00239146	-1.10886
TUBA4A	"tubulin, alpha 4a"	chr2:219802722-219827574	2132.07	1923.9	0.000525676	-1.1082
COX6C	cytochrome c oxidase subunit VIc	chr8:100959547-100975071	3206.29	2894.62	6.6501e-05	-1.10767
FEZ1	fasciculation and elongation protein zeta 1 (zygin I)	chr11:124809210-124871917	1861.67	1680.74	0.0023663	-1.10765
SPARCL1	SPARC-like 1 (hevin)	chr4:88613523-88669530	4593.19	4156.36	3.04008e-06	-1.1051
PKM2	"pyruvate kinase, muscle"	chr15:70278423-70310738	5697.1	5158.39	2.52128e-07	-1.10443
THTPA	thiamine triphosphatase	chr14:23095070-23117849	194.458	176.282	0.00102874	-1.10311
SNAPC2	"small nuclear RNA activating complex, polypeptide 2, 45kDa"	chr19:7891228-7914538	126.991	115.229	0.0006313	-1.10207
SNAP25	"synaptosomal-associated protein, 25kDa"	chr20:10147476-10236065	10240.9	9293.3	1.22313e-11	-1.10197
PLP1	proteolipid protein 1	chrX:102918409-102934201	5116.73	4644.55	1.77966e-06	-1.10166
APOD	apolipoprotein D	chr3:196776866-196792278	1967.24	1790.61	0.00397292	-1.09864
RPLP1	"ribosomal protein, large, P1"	chr15:67493741-67534938	2819.74	2568.64	0.00061466	-1.09776
STMN2	stathmin-like 2	chr8:80685915-80740868	2840.28	2589.15	0.00065692	-1.09699
MDH1	"malate dehydrogenase 1, NAD (soluble)"	chr2:63669595-63687832	4207.31	3838.12	4.75153e-05	-1.09619
RPL27	ribosomal protein L27	chr17:38403971-38408482	2874.62	2622.67	0.000720426	-1.09607
FXYD7	FXYD domain containing ion transport regulator 7	chr19:40325993-40337045	2658.14	2429.88	0.00137919	-1.09394
ATP1B1	"ATPase, Na+/K+ transporting, beta 1 polypeptide"	chr1:167341558-167603810	3272.42	2992.34	0.000397242	-1.0936
PYCARD	PYD and CARD domain containing	chr16:31084765-31144011	19.6099	17.9381	0.00103803	-1.0932
RTN3	reticulon 3	chr11:63205497-63283913	3506.49	3218.02	0.000438702	-1.08964
SLC22A17	"solute carrier family 22, member 17"	chr14:22885351-22891961	3030.35	2786.92	0.00143822	-1.08735
PRDX2	peroxiredoxin 2	chr19:12768633-12773694	2908.94	2676.79	0.00201076	-1.08673
CABP1	calcium binding protein 1	chr12:119562804-119589508	3745.28	3455.46	0.000669138	-1.08387
PCSK1N	proprotein convertase subtilisin/kexin type 1 inhibitor	chrX:48574450-48578921	6222.15	5741.31	1.10772e-05	-1.08375
PKIB	"protein kinase (cAMP-dependent, catalytic) inhibitor beta"	chr6:122806194-123089217	38.2014	35.271	0.00169179	-1.08308
WDR34	WD repeat domain 34	chr9:130354686-130458950	110.519	102.233	1.68966e-05	-1.08105
Mar-02	NA	chr19:7929457-8459885	516.278	477.958	0.00158802	-1.08017
PLD3	"phospholipase D family, member 3"	chr19:45546424-45576230	3369.43	3119.37	0.00189682	-1.08016
MEG3	maternally expressed 3 (non-protein coding)	chr14:100362215-100397111	1870.42	1732.33	0.00368016	-1.07971
ATP1A3	"ATPase, Na+/K+ transporting, alpha 3 polypeptide"	chr19:47162577-47190222	3766.02	3493.11	0.00136279	-1.07813
DNM1	dynamin 1	chr9:129968164-130057348	3088.58	2867.74	0.00254426	-1.07701
MT-ND3	"NADH dehydrogenase, subunit 3 (complex I)"	chrM:10059-10405	111770	104801	0	-1.0665
MT-CO1	cytochrome c oxidase subunit I	chrM:5904-7517	192225	180381	0	-1.06566
CKB	"creatine kinase, brain"	chr14:103055748-103058923	12227.3	11533.4	6.74443e-06	-1.06016
OLFM1	olfactomedin 1	chr9:137106909-137152851	7042.65	6665.68	0.00188762	-1.05655
MT-CO2	cytochrome c oxidase subunit II	chrM:7586-8270	257424	243775	0	-1.05599
CHN1	chimerin (chimaerin) 1	chr2:175372336-175578361	6346.16	6018.59	0.0032631	-1.05443
ALDOA	"aldolase A, fructose-bisphosphate"	chr16:29971944-29989242	9974.28	9511.72	0.000923918	-1.04863
MT-ND1	"NADH dehydrogenase, subunit 1 (complex I)"	chrM:3307-4401	183063	174790	0	-1.04733
MT-CYB	cytochrome b	chrM:14747-15882	126922	121664	0	-1.04322
MT-ATP6	ATP synthase F0 subunit 6	chrM:8366-9988	292530	281439	0	-1.03941
MT-ND2	MTND2	chrM:4470-5512	137837	132915	0	-1.03703
SNORA7A	"small nucleolar RNA, H/ACA box 7A"	chr3:12851444-12858081	0.00836848	0.00860339	0.00270394	1.02807
PRDX5	peroxiredoxin 5	chr11:63824438-63845858	3635.95	3860.8	0.00284075	1.06184
C22orf24	chromosome 22 open reading frame 24	chr22:30659506-30683590	4.17314	4.43242	0.000171519	1.06213
UBC	ubiquitin C	chr12:123962146-123965530	12220.8	13040.7	9.7033e-07	1.06709
APOE	apolipoprotein E	chr19:50100878-50104489	3767.33	4023.35	0.00373115	1.06796
Sep-05	septin 5	chr22:18081986-18092297	3688.95	3942.17	0.00365615	1.06864
PEBP1	phosphatidylethanolamine binding protein 1	chr12:117058252-117067770	5376.96	5753.17	0.000363353	1.06997
FTL	"ferritin, light polypeptide"	chr19:54160377-54161947	6480.13	6935.69	8.41256e-05	1.0703
SNORA31	"small nucleolar RNA, H/ACA box 31"	chr13:44809007-44813347	23.6812	25.3553	0	1.07069
C19orf71	chromosome 19 open reading frame 71	chr19:3441823-3723219	18.6101	20.0091	1.06794e-05	1.07517
RPL3	ribosomal protein L3	chr22:38038832-38045616	2674	2893.65	0.00327897	1.08214
YWHAH	"tyrosine 3-monooxygenase/tryptophan 5-monooxygenase activation protein, eta polypeptide"	chr22:30659506-30683590	5097.31	5527.13	3.04587e-05	1.08432
MTCH1	mitochondrial carrier homolog 1 (C. elegans)	chr6:37043895-37167595	2333.62	2535.88	0.00373102	1.08667
FAU	Finkel-Biskis-Reilly murine sarcoma virus (FBR-MuSV) ubiquitously expressed	chr11:64644678-64658579	1999.77	2178.13	0.000634301	1.08919
MRFAP1	Mof4 family associated protein 1	chr4:6692718-6695357	2325.28	2536.13	0.00250393	1.09068
PPIA	peptidylprolyl isomerase A (cyclophilin A)	chr7:44802804-44807754	4414.83	4815.77	3.022e-05	1.09082
CIZ1	CDKN1A interacting zinc finger protein 1	chr9:129968164-130057348	367.885	401.336	0.000149451	1.09093
RPL18	ribosomal protein L18	chr19:53810402-53814245	2758.18	3011.73	0.000847316	1.09193
MYL6	"myosin, light chain 6, alkali, smooth muscle and non-muscle"	chr12:54838366-54841633	2622.95	2864.4	0.00134256	1.09205
RPS6	ribosomal protein S6	chr9:19366253-19385742	2802.41	3064.37	0.000629707	1.09348
APP	amyloid beta (A4) precursor protein	chr21:26174732-26465003	3877.14	4242	5.20254e-05	1.09411
RPL36	ribosomal protein L36	chr19:5641271-5642674	2307.99	2525.75	0.00175764	1.09435
GLUL	glutamate-ammonia ligase	chr1:180617461-180627964	2145.71	2349.99	0.00232383	1.0952
HEATR2	HEAT repeat containing 2	chr7:555360-795716	26.1146	28.6027	0.0012177	1.09528
TUBB3	"tubulin, beta 3"	chr16:88513167-88530006	2050.18	2246.61	0.00274233	1.09581
RPS15	ribosomal protein S15	chr19:1389362-1391492	2830.04	3101.53	0.000425392	1.09593
TMSL3	thymosin-like 3	chr4:91978658-91979286	3675.06	4028	5.82055e-05	1.09604
UBA52	ubiquitin A-52 residue ribosomal protein fusion product 1	chr19:18545110-18546960	2268.64	2488.83	0.00141693	1.09706
DYNLRB1	"dynein, light chain, roadblock-type 1"	chr20:32567864-32592422	3042.76	3350.44	0.000119801	1.10112
LY6H	"lymphocyte antigen 6 complex, locus H"	chr8:144310708-144313120	1754.83	1938.11	0.00257081	1.10444
ATPIF1	ATPase inhibitory factor 1	chr1:28435197-28437196	2362.78	2613.34	0.000580462	1.10604
ISYNA1	inositol-3-phosphate synthase 1	chr19:18312396-18526861	76.6037	84.7447	5.61849e-07	1.10627
TBXA2R	thromboxane A2 receptor	chr19:3441823-3723219	2.98664	3.30932	0.000783348	1.10804
RPS14	ribosomal protein S14	chr5:149802945-149809512	3068.49	3400.33	4.10179e-05	1.10814
DLG2	"discs, large homolog 2 (Drosophila)"	chr11:82843700-85015962	209.392	232.161	0.00339775	1.10874
HNRNPA2B1	heterogeneous nuclear ribonucleoprotein A2/B1	chr7:26196080-26206942	1533.79	1705.66	0.00256422	1.11206
TMSB4X	"thymosin beta 4, X-linked"	chrX:12903149-12905267	6994.57	7785.45	8.11315e-11	1.11307
POLR2F	polymerase (RNA) II (DNA directed) polypeptide F	chr22:36679649-36767059	407.469	453.969	0.00125577	1.11412
RPS8	ribosomal protein S8	chr1:45013827-45017038	1940.96	2162.81	0.00053732	1.1143
TUBB2C	"tubulin, beta 2C"	chr9:139255531-139262043	1654.25	1847.81	0.00107186	1.11701
YWHAE	"tyrosine 3-monooxygenase/tryptophan 5-monooxygenase activation protein, epsilon polypeptide"	chr17:1194594-1250267	3313.08	3707.88	2.48744e-06	1.11916
MT-ND5	"NADH dehydrogenase, subunit 5 (complex I)"	chrM:12337-14149	35671.6	39932.6	0	1.11945
SERF2	small EDRK-rich factor 2	chr15:41852106-41904243	3423.48	3835.2	2.0607e-07	1.12026
COX4I1	cytochrome c oxidase subunit IV isoform 1	chr16:84390696-84398109	4988.07	5591.72	4.47506e-09	1.12102
FTH1P8	"ferritin, heavy polypeptide 1 pseudogene 8"	chr8:82596348-82597221	1358.08	1528.58	0.00151623	1.12554
S100B	S100 calcium binding protein B	chr21:46842967-46849549	1643.98	1850.6	0.00049051	1.12568
GAP43	growth associated protein 43	chr3:116824860-116923024	2455.78	2772.07	1.23664e-05	1.12879
MT-ND6	"NADH dehydrogenase, subunit 6 (complex I)"	chrM:14149-14674	41520.6	46916.8	0	1.12996
TPT1	"tumor protein, translationally-controlled 1"	chr13:44809007-44813347	3759.97	4248.72	4.92503e-08	1.12999
MIR1282	microRNA 1282	chr15:41852106-41904243	6.76074e-06	7.64064e-06	0	1.13015
RPS16	ribosomal protein S16	chr19:44615691-44618458	1499.67	1696.14	0.000514384	1.13101
ENC1	ectodermal-neural cortex 1 (with BTB-like domain)	chr5:73958990-73972273	1970.94	2229.23	6.80403e-05	1.13105
FOXH1	forkhead box H1	chr8:145624998-145703357	23.9299	27.09	1.17091e-05	1.13206
ZRSR1	"zinc finger (CCCH type), RNA-binding motif and serine/arginine rich 1"	chr5:112239979-112285930	33.1199	37.5236	0.000446166	1.13296
SURF2	surfeit 2	chr9:135204889-135232791	218.116	247.568	4.77011e-06	1.13503
RPL11	ribosomal protein L11	chr1:23890880-23895502	2633.97	2991.79	1.86572e-06	1.13585
FTH1P15	"ferritin, heavy polypeptide 1 pseudogene 15"	chr6:56927731-57000097	44.1814	50.3376	7.54633e-05	1.13934
HPCAL1	hippocalcin-like 1	chr2:10360490-10485193	1054.4	1203.23	0.00174826	1.14115
ALDOC	"aldolase C, fructose-bisphosphate"	chr17:23924259-23928079	4857.29	5547.96	1.39944e-11	1.14219
CD63	CD63 molecule	chr12:54400487-54411977	1141.03	1303.41	0.000943013	1.14231
DYNLL1	"dynein, light chain, LC8-type 1"	chr12:119392042-119420680	4460.23	5096.92	7.72145e-11	1.14275
FBXO2	F-box protein 2	chr1:11631032-11645971	1347.98	1540.55	3.23697e-07	1.14286
NDUFS5	"NADH dehydrogenase (ubiquinone) Fe-S protein 5, 15kDa (NADH-coenzyme Q reductase)"	chr1:39264592-39272873	3563.25	4075.89	4.7225e-09	1.14387
EEF1A1P5	eukaryotic translation elongation factor 1 alpha 1 pseudogene 5	chr9:134884658-134886082	2434.51	2785.44	1.21276e-06	1.14415
SPSB2	splA/ryanodine receptor domain and SOCS box containing 2	chr12:6846543-6852713	19.2048	21.9852	1.15123e-09	1.14478
CLU	clusterin	chr8:27491965-27528215	14039.8	16095	0	1.14638
NCL	nucleolin	chr2:232027705-232037449	879.222	1009.83	0.0027687	1.14855
HSP90AA4P	"heat shock protein 90kDa alpha (cytosolic), class A member 4 (pseudogene)"	chr4:89032018-89034191	1120.35	1286.96	0.000690983	1.14871
TSPYL2	TSPY-like 2	chrX:53128273-53134446	1098.27	1264.96	0.000612375	1.15178
NUDC	nuclear distribution gene C homolog (A. nidulans)	chr1:27120810-27145475	802.807	925.583	0.00328243	1.15293
TMSB10	"thymosin beta 4, X-linked"	chr2:84986273-84987310	8464.33	9759.61	0	1.15303
PTMS	parathymosin	chr12:6745801-6750379	1767.49	2038.21	1.16201e-05	1.15317
C1orf151	chromosome 1 open reading frame 151	chr1:19796053-19839759	1033.35	1193.46	3.21317e-05	1.15494
DYNLL1P1	dynein, cytoplasmic, light polypeptide 1 pseudogene 1 |DNCL1P1 | dynein, light chain, LC8-type 1 pseudogene 1	chr14:80782390-80782660	948.311	1095.51	0.00114146	1.15522
C1orf182	chromosome 1 open reading frame 182	chr1:154545375-154604261	1.21797	1.40728	2.09566e-05	1.15543
HNRNPM	heterogeneous nuclear ribonucleoprotein M	chr19:7929457-8459885	319.982	370.519	8.86852e-06	1.15794
MTRNR2L2	MT-RNR2-like 2	chrM:1672-3230	255506	296033	0	1.15861
RPS3	ribosomal protein S3	chr11:74788209-74794378	1398.45	1627.49	3.24142e-05	1.16378
RPL37A	ribosomal protein L37a	chr2:217071764-217074428	3208.65	3747.13	1.11836e-10	1.16782
MFAP1	microfibrillar-associated protein 1	chr15:41852106-41904243	107.663	126.071	0.00048079	1.17098
NDRG1	N-myc downstream regulated 1	chr8:134318595-134378680	701.061	822.423	0.00190408	1.17311
PGPEP1	pyroglutamyl-peptidase I	chr19:18312396-18526861	35.683	41.8891	6.98627e-05	1.17392
BEX1	"brain expressed, X-linked 1"	chrX:102204243-102205824	4003.43	4706.66	5.19584e-14	1.17566
TCEAL4	transcription elongation factor A (SII)-like 4	chrX:102718053-102729309	810.029	954.197	0.000606866	1.17798
GPR21	G protein-coupled receptor 21	chr9:124743108-124906966	10.3061	12.1504	0.00301684	1.17895
C16orf92	chromosome 16 open reading frame 92	chr16:29942155-29949687	7.14621	8.43576	0.00148874	1.18045
DDN	dendrin	chr12:47675199-47679359	893.905	1056.28	0.000240072	1.18165
SYP	synaptophysin	chrX:48931200-48943606	4729.72	5589.18	0	1.18171
INTS4	integrator complex subunit 4	chr11:77267415-77383365	23.1077	27.3072	0.00392962	1.18174
NDUFA1	"NADH dehydrogenase (ubiquinone) 1 alpha subcomplex, 1, 7.5kDa"	chrX:118888465-118894624	1791.17	2119.15	2.04262e-08	1.18311
DRAP1	DR1-associated protein 1 (negative cofactor 2 alpha)	chr11:65443303-65445607	782.992	926.886	0.000509479	1.18377
AHSA1	"AHA1, activator of heat shock 90kDa protein ATPase homolog 1 (yeast)"	chr14:76994154-77005560	834.169	988.051	0.000317523	1.18447
CACYBP	calcyclin binding protein	chr1:173235193-173247786	906.331	1074.84	0.000372047	1.18592
GFAP	glial fibrillary acidic protein	chr17:40338518-40348394	4738	5620.16	0	1.18619
SLCO5A1	"solute carrier organic anion transporter family, member 5A1"	chr8:70747128-70909762	1.46411	1.73678	0	1.18624
ATP5I	"ATP synthase, H+ transporting, mitochondrial Fo complex, subunit E"	chr4:656227-658122	2703.75	3208.04	5.72573e-11	1.18652
SNCA	"synuclein, alpha (non A4 component of amyloid precursor)"	chr4:90865727-90978489	1124.87	1336.13	4.19961e-05	1.18781
RPL35	ribosomal protein L35	chr9:126655575-126664061	2097.63	2494.68	4.82377e-09	1.18929
LSM7	"LSM7 homolog, U6 small nuclear RNA associated (S. cerevisiae)"	chr19:2272521-2306099	264.879	315.797	0.00025179	1.19223
MT3	metallothionein 3	chr16:55180767-55182500	7850.78	9376.59	0	1.19435
ETFB	"electron-transfer-flavoprotein, beta polypeptide"	chr19:56540221-56561484	770.228	920.287	0.000268162	1.19482
GABRA5	"gamma-aminobutyric acid (GABA) A receptor, alpha 5"	chr15:24339785-24777095	252.443	302.336	0.000559874	1.19764
HMGN2P8	high-mobility group nucleosomal binding domain 2 pseudogene 8	chr15:27778862-27901998	78.6885	94.3232	0.00179997	1.19869
DNAL4	"dynein, axonemal, light chain 4"	chr22:37460675-37520149	208.943	250.858	9.27603e-06	1.2006
POLR2L	"polymerase (RNA) II (DNA directed) polypeptide L, 7.6kDa"	chr11:829753-832529	527.635	634.76	0.00170347	1.20303
ITM2C	integral membrane protein 2C	chr2:231437556-231452206	3032.95	3662.56	1.62093e-14	1.20759
EVI2B	ecotropic viral integration site 2B	chr17:26446120-26728817	6.40758	7.74097	0.000408232	1.2081
EEF1D	eukaryotic translation elongation factor 1 delta (guanine nucleotide exchange protein)	chr8:144733040-144750726	564.166	681.576	0.000960873	1.20811
BLOC1S1	"biogenesis of lysosomal organelles complex-1, subunit 1"	chr12:54396087-54399751	1153.65	1397.63	1.41483e-06	1.21149
C6orf114	chromosome 6 open reading frame 114	chr6:13466040-13595766	13.9341	16.8913	0.000339208	1.21223
SHFM1	split hand/foot malformation (ectrodactyly) type 1	chr7:96156018-96177139	429.782	521.18	0.00308396	1.21266
THRA	"thyroid hormone receptor, alpha (erythroblastic leukemia viral (v-erb-a) oncogene homolog, avian)"	chr17:35472677-35510499	1021.81	1241.04	2.92995e-07	1.21455
RPL8	ribosomal protein L8	chr8:145985958-145988609	3481.55	4231.93	0	1.21553
NPTXR	neuronal pentraxin receptor	chr22:37544402-37569963	993.706	1210.59	3.99049e-06	1.21826
TCEAL5	transcription elongation factor A (SII)-like 5	chrX:102415274-102418456	597.708	728.317	0.000342428	1.21852
NPTX1	neuronal pentraxin I	chr17:76055227-76064999	621.389	758.384	0.000231415	1.22047
RPS9	ribosomal protein S9	chr19:59396537-59403327	2495.44	3052.18	1.54987e-13	1.2231
CALR	calreticulin	chr19:12910422-12916303	1040.96	1273.63	1.37946e-06	1.22351
Sep-04	septin 4	chr17:53952614-53964410	2392.24	2930.55	1.81632e-13	1.22502
C1orf77	chromosome 1 open reading frame 77	chr1:151857898-151885402	308.089	377.536	1.18407e-06	1.22541
UBA52P6	RPL40_3_969 | ubiquitin A-52 residue ribosomal protein fusion product 1 pseudogene 6	chr9:21792634-22019516	256.533	314.532	0.00139594	1.22609
PFDN2	prefoldin subunit 2	chr1:159336970-159354490	696.107	854.205	6.11606e-05	1.22712
IFITM3	interferon induced transmembrane protein 3 (1-8U)	chr11:309677-310848	942.429	1156.89	3.60174e-06	1.22756
RP9P	retinitis pigmentosa 9 pseudogene |FLJ33904	chr7:32501662-33068934	94.7325	116.333	6.43312e-05	1.22802
HK3	hexokinase 3 (white cell)	chr5:176170165-176258939	1.43533	1.76276	0.00170169	1.22812
FXYD1	FXYD domain containing ion transport regulator 1	chr19:40321567-40325853	658.405	809.244	7.67503e-05	1.2291
TCEAL2	transcription elongation factor A (SII)-like 2	chrX:101267315-101269339	1576.33	1937.69	2.53856e-09	1.22924
FAM107A	"family with sequence similarity 107, member A"	chr3:58524883-58538531	1650.99	2031.03	4.05853e-10	1.23019
UBB	ubiquitin B	chr17:16225091-16226779	8857.4	10902.3	0	1.23087
TIMP1	TIMP metallopeptidase inhibitor 1	chrX:47305521-47364200	116.166	143.001	0	1.23101
TUBB2A	"tubulin, beta 2A"	chr6:3098917-3102808	3351.34	4128.31	0	1.23184
SYN2	synapsin II	chr3:12020861-12208532	345.225	425.994	0.0032725	1.23396
TRMT112	tRNA methyltransferase 11-2 homolog (S. cerevisiae)	chr11:63824438-63845858	805.942	995.359	0	1.23503
BAIAP3	BAI1-associated protein 3	chr16:1323654-1341876	264.893	327.98	0.00278082	1.23816
HSP90AB1	"heat shock protein 90kDa alpha (cytosolic), class B member 1"	chr6:44322801-44329598	3786.11	4689.42	0	1.23859
KLHDC8B	kelch domain containing 8B	chr3:49042147-49270159	84.3311	104.469	6.33476e-06	1.2388
HSPE1	heat shock 10kDa protein 1 (chaperonin 10)	chr2:198059554-198076351	480.653	596.637	4.02989e-12	1.24131
TSR2	"TSR2, 20S rRNA accumulation, homolog (S. cerevisiae)"	chrX:54483577-54488453	822.707	1021.94	3.6623e-06	1.24217
ACIN1	apoptotic chromatin condensation inducer 1	chr14:22597615-22639500	260.296	323.701	0.00333226	1.24359
PMVK	phosphomevalonate kinase	chr1:153163834-153176108	354.689	441.113	0.00223157	1.24366
CAPN12	calpain 12	chr19:43830166-43926954	2.7782	3.45555	0.00112893	1.24381
FUS	fused in sarcoma	chr16:31084765-31144011	785.604	978.046	3.37607e-06	1.24496
C10orf116	chromosome 10 open reading frame 116	chr10:88718167-88720646	336.38	419.277	0.00302574	1.24644
CHMP2A	chromatin modifying protein 2A	chr19:63754745-63758298	850.818	1060.5	1.69858e-06	1.24645
PLEKHB1	"pleckstrin homology domain containing, family B (evectins) member 1"	chr11:73023591-73051510	2482.4	3095.18	2.22045e-16	1.24685
PRKCG	"protein kinase C, gamma"	chr19:59077278-59102713	407.433	508.157	0.00089372	1.24722
DYNC1LI2	"dynein, cytoplasmic 1, light intermediate chain 2"	chr16:65312300-65343026	326.329	407.141	0.00290312	1.24764
HSP90AA1	"heat shock protein 90kDa alpha (cytosolic), class A member 1"	chr14:101617138-101675494	2890.66	3609.96	0	1.24884
CD72	CD72 molecule	chr9:35595280-35609539	14.7383	18.4145	0.00357415	1.24943
CALM3	"calmodulin 1 (phosphorylase kinase, delta)"	chr19:51796351-51805878	11040.1	13795.9	0	1.24962
NUDT3	nudix (nucleoside diphosphate linked moiety X)-type motif 3	chr6:34363981-34468419	330.933	413.913	0.00241225	1.25075
PFDN6	prefoldin subunit 6	chr6:33354863-33374716	538.781	674.038	9.35887e-10	1.25104
MIR770	microRNA 770	chr14:100362215-100397111	111.491	139.877	0	1.2546
C16orf3	chromosome 16 open reading frame 3	chr16:88616508-88641534	1.93373	2.4263	6.03547e-07	1.25473
AIF1L	allograft inflammatory factor 1-like	chr9:132961732-133098909	310.055	389.523	0.00129495	1.2563
SCN3B	"sodium channel, voltage-gated, type III, beta"	chr11:123005106-123030525	378.68	476.885	0.00080824	1.25934
ANXA2P1	LPC2A | annexin A2 pseudogene 1 | ANX2P1 |ANX2L1	chr4:154345067-154479924	3.18742	4.01744	8.1485e-10	1.2604
TCEAL3	transcription elongation factor A (SII)-like 3	chrX:102749034-102751511	732.119	923.2	2.80248e-06	1.261
FTH1P3	"ferritin, heavy polypeptide 1 pseudogene 3"	chr2:27457565-27486000	26.4805	33.5236	7.29709e-08	1.26597
CABP7	calcium binding protein 7	chr22:28446343-28564265	17.4001	22.0304	0.00102009	1.26611
EDF1	endothelial differentiation-related factor 1	chr9:138876391-138880559	3043.96	3854.75	0	1.26636
RPL13P6	ribosomal protein L13a pseudogene 4 |RPL13AP4 | RPL13_5_1409 | ribosomal protein L13 pseudogene 6	chr14:102468469-102593552	0.900828	1.14212	0	1.26786
C17orf84	FLJ22594 | chromosome 17 open reading frame 84	chr17:16886798-17029612	4.90107	6.21471	0	1.26803
SUMO4	SMT3 suppressor of mif two 3 homolog 4 (S. cerevisiae)	chr6:149680755-149774442	1.0071	1.27763	0.00102373	1.26862
PSMD4	"proteasome (prosome, macropain) 26S subunit, non-ATPase, 4"	chr1:149493808-149506579	594.175	755.365	1.20169e-05	1.27128
SOD1	"superoxide dismutase 1, soluble"	chr21:31953805-31963115	2967.99	3782.07	0	1.27429
CFDP1	craniofacial development protein 1	chr16:73885108-74024888	351.191	447.64	0.000663799	1.27463
MAP4	microtubule-associated protein 4	chr3:47867189-48105768	689.698	883.761	1.28253e-06	1.28137
NUCKS1	nuclear casein kinase and cyclin-dependent kinase substrate 1	chr1:203953731-203985920	324.292	416.558	0.000722339	1.28452
SNURF	SNRPN upstream reading frame	chr15:22619886-22776293	951.67	1222.72	0	1.28482
S100A1	S100 calcium binding protein A1	chr1:151857898-151885402	1967.07	2527.36	0	1.28483
HRAS	v-Ha-ras Harvey rat sarcoma viral oncogene homolog	chr11:522241-525591	740.396	952.364	2.78174e-07	1.28629
FABP7	"fatty acid binding protein 7, brain"	chr6:123142344-123146915	255.343	330.245	0.00202654	1.29334
DNAJB2	"DnaJ (Hsp40) homolog, subfamily B, member 2"	chr2:219852283-219861207	1022.69	1323.83	6.22201e-10	1.29446
STIP1	stress-induced-phosphoprotein 1	chr11:63709872-63728596	454.613	588.871	3.40578e-05	1.29532
ACYP1	"acylphosphatase 1, erythrocyte (common) type"	chr14:74589682-74600489	214.641	278.707	0.00402615	1.29848
MMEL1	membrane metallo-endopeptidase-like 1	chr1:2508096-2554289	0.651177	0.846494	0.002047	1.29994
SNCG	"synuclein, gamma (breast cancer-specific protein 1)"	chr10:88708350-88712995	2502.29	3255.68	0	1.30108
NDRG2	NDRG family member 2	chr14:20554762-20563775	4267.98	5558.08	0	1.30227
RPL37	ribosomal protein L37	chr5:40867186-40871144	2008.31	2615.9	0	1.30254
HNRNPH3	heterogeneous nuclear ribonucleoprotein H3 (2H9)	chr10:69712422-69772950	366.219	477.813	8.89947e-05	1.30472
C1orf192	chromosome 1 open reading frame 192	chr1:159550789-159604288	21.5007	28.0774	9.74518e-05	1.30588
SNRPD3	small nuclear ribonucleoprotein D3 polypeptide 18kDa	chr22:23266409-23354972	221.515	289.404	1.25269e-06	1.30648
FAM166A	"family with sequence similarity 166, member A"	chr9:139255531-139262043	2.65793	3.47906	0	1.30894
U2AF1	U2 small nuclear RNA auxiliary factor 1	chr21:43386135-43400757	270.371	355.355	0.000707611	1.31432
ARGLU1	arginine and glutamate rich 1	chr13:105992021-106018513	256.258	337.09	0.00111622	1.31543
TAF15	"TAF15 RNA polymerase II, TATA box binding protein (TBP)-associated factor, 68kDa"	chr17:31160595-31198350	546.252	720.148	1.11009e-06	1.31834
C10orf31	chromosome 10 open reading frame 31	chr10:11099932-11509495	1.98104	2.62309	0.000164876	1.3241
TRIM72	tripartite motif-containing 72	chr16:31084765-31144011	8.95957	11.8643	2.49323e-08	1.3242
TSPAN18	tetraspanin 18	chr11:44838450-44929433	5.90284	7.84841	0.003991	1.3296
PPM1N	"protein phosphatase, Mg2+/Mn2+ dependent, 1N (putative)"	chr19:50680389-50697608	26.1548	34.7764	1.57563e-12	1.32964
ANP32B	"acidic (leucine-rich) nuclear phosphoprotein 32 family, member B"	chr9:99785309-99818046	199.042	265.299	0.00218247	1.33288
CHMP4A	chromatin modifying protein 4A	chr14:23748626-23755081	179.947	239.943	0.000525155	1.33341
TUBB2B	"tubulin, beta 2B"	chr6:3169515-3172870	1760.69	2359.13	0	1.33989
PEA15	phosphoprotein enriched in astrocytes 15	chr1:158441748-158451790	2389.53	3210.04	0	1.34338
NUDT16	nudix (nucleoside diphosphate linked moiety X)-type motif 16	chr3:132583396-132587619	161.464	217.752	0.00398012	1.34861
HSPD1	heat shock 60kDa protein 1 (chaperonin)	chr2:198059554-198076351	287.328	387.642	8.79083e-06	1.34913
RPL37AP8	ribosomal protein L37a pseudogene 8	chr11:111265132-111265725	1456.54	1968.69	0	1.35162
HSPH1	heat shock 105kDa/110kDa protein 1	chr13:30608764-30634117	519.086	702.768	1.66283e-07	1.35386
CCL25	chemokine (C-C motif) ligand 25	chr19:7929457-8459885	4.54521	6.1595	0	1.35516
GPHA2	glycoprotein hormone alpha 2	chr11:64448755-64459936	0.74162	1.00868	0	1.3601
MED26	mediator complex subunit 26	chr19:16450877-16600015	21.2072	28.8487	0.000168421	1.36033
PBXIP1	pre-B-cell leukemia homeobox interacting protein 1	chr1:153183175-153195221	270.64	369.511	9.93992e-05	1.36532
SYCE2	synaptonemal complex central element protein 2	chr19:12862973-12891071	3.42102	4.67097	0.00225381	1.36537
DERL3	"Der1-like domain family, member 3"	chr22:22459149-22511201	15.8885	21.856	0.00116648	1.37559
KCNJ13	"potassium inwardly-rectifying channel, subfamily J, member 13"	chr2:233270258-233433529	0.378138	0.521156	0.000929659	1.37822
MAP4K4	mitogen-activated protein kinase kinase kinase kinase 4	chr2:101680919-101877583	305.841	421.734	1.89029e-05	1.37893
WISP3	WNT1 inducible signaling pathway protein 3	chr6:112481970-112530685	4.57775	6.31862	0.00134638	1.38029
TCTE3	t-complex-associated-testis-expressed 3	chr6:169878919-169923605	1.16677	1.61697	0.00347224	1.38585
CCDC121	coiled-coil domain containing 121	chr2:27702009-27771347	5.67429	7.86645	8.57522e-07	1.38633
DNAJA1	"DnaJ (Hsp40) homolog, subfamily A, member 1"	chr9:33015241-33029277	618.942	861.166	3.66758e-10	1.39135
TAPBPL	TAP binding protein-like	chr12:6431519-6450326	17.1725	23.9097	1.66533e-14	1.39232
MCM3AP-AS1	MCM3AP antisense RNA 1 (non-protein coding)	chr21:46473572-46530639	6.16229	8.59982	0.000138608	1.39556
PDE3A	"phosphodiesterase 3A, cGMP-inhibited"	chr12:20413463-20725148	0.831756	1.16546	0	1.4012
SNTB2	"syntrophin, beta 2 (dystrophin-associated protein A1, 59kDa, basic component 2)"	chr16:67778532-67916446	15.1444	21.3018	0.00173407	1.40658
SNORD94	"small nucleolar RNA, C/D box 94"	chr2:86186848-86222791	12.1354	17.1547	0	1.41361
SNORA64	"small nucleolar RNA, H/ACA box 64"	chr16:1952062-1954828	11.085	15.7067	0	1.41693
C7orf41	chromosome 7 open reading frame 41	chr7:30141076-30168906	1739.7	2465.74	0	1.41734
HSH2D	hematopoietic SH2 domain containing	chr19:15938465-16130344	1.23614	1.75254	2.42656e-05	1.41775
SNORA57	"small nucleolar RNA, H/ACA box 57"	chr11:62186865-62196424	21.5816	30.7542	0	1.42502
RBP1	"retinol binding protein 1, cellular"	chr3:140718969-140741180	214.5	306.338	6.25597e-05	1.42815
C10orf10	chromosome 10 open reading frame 10	chr10:44775224-44810174	47.6207	68.1848	2.02066e-06	1.43183
IFITM2	interferon induced transmembrane protein 2 (1-8D)	chr11:298162-299395	190.567	273.289	0.000160956	1.43408
TPM2	tropomyosin 2 (beta)	chr9:35671989-35680053	145.785	209.314	0.00082915	1.43577
MOBP	myelin-associated oligodendrocyte basic protein	chr3:39484073-39542105	825.692	1187.42	1.11022e-15	1.43809
ALDH1L1	"aldehyde dehydrogenase 1 family, member L1"	chr3:127305097-127382719	115.616	166.269	0.00269635	1.43811
GPT	glutamic-pyruvate transaminase (alanine aminotransferase)	chr8:145624998-145703357	16.2523	23.4464	0	1.44265
ACTA2	"actin, alpha 2, smooth muscle, aorta"	chr10:90629994-90723050	61.5269	88.8603	0.000205118	1.44425
PKP4	plakophilin 4	chr2:159021721-159299760	285.449	413.012	1.54898e-06	1.44689
C15orf62	chromosome 15 open reading frame 62	chr15:38847362-38894059	5.29888	7.67574	2.48065e-05	1.44856
MIR1184-1	microRNA 1184-3	chrX:154264942-154266643	0.028673	0.0415506	0	1.44912
ZEB2	zinc finger E-box binding homeobox 2	chr2:144862054-144994386	116.168	168.547	0.00204131	1.45089
KIF5B	kinesin family member 5B	chr10:32340076-32385334	101.584	147.579	0.0037704	1.45278
NPTX2	neuronal pentraxin II	chr7:98084539-98097117	307.978	447.699	4.34567e-07	1.45367
GAB2	GRB2-associated binding protein 2	chr11:77603989-77806414	103.125	150.713	0.00298767	1.46146
ARHGAP19	Rho GTPase activating protein 19	chr10:98747784-99042403	10.3803	15.1924	2.17252e-06	1.46358
GAPDHP42	glyceraldehyde 3 phosphate dehydrogenase pseudogene 42	chr6:70442418-70563609	1.13733	1.66543	2.43992e-07	1.46433
FKBP4	"FK506 binding protein 4, 59kDa"	chr12:2774413-2783381	710.931	1042.3	3.77476e-15	1.46611
MYBPC2	"myosin binding protein C, fast type"	chr19:55627971-55678419	1.33713	1.96512	1.30539e-05	1.46966
VAMP5	vesicle-associated membrane protein 5 (myobrevin)	chr2:85665041-85674020	102.811	151.28	0.00251219	1.47144
C10orf111	chromosome 10 open reading frame 111	chr10:15172918-15250701	3.77228	5.55136	0.000944727	1.47162
ARHGAP9	Rho GTPase activating protein 9	chr12:56140200-56200567	19.4072	28.5662	5.9264e-08	1.47194
C3orf45	chromosome 3 open reading frame 45	chr3:50291521-50311903	4.39835	6.49565	3.4367e-05	1.47684
FOXO4	forkhead box O4	chrX:70232750-70240110	127.133	187.798	0.000688644	1.47718
RPRM	"reprimo, TP53 dependent G2 arrest mediator candidate"	chr2:154042097-154043568	92.3398	136.505	0.00371991	1.47829
CPLX2	complexin 2	chr5:175156215-175243629	1073.74	1588.18	0	1.47911
LRRTM2	leucine rich repeat transmembrane neuronal 2	chr5:138117005-138298619	27.3697	40.7074	1.53433e-13	1.48732
PAQR6	progestin and adipoQ receptor family member VI	chr1:154479830-154484471	1607.25	2390.99	0	1.48763
DNAJA4	"DnaJ (Hsp40) homolog, subfamily A, member 4"	chr15:76343550-76361591	330.679	492.193	2.2253e-08	1.48843
MBP	myelin basic protein	chr18:72819770-72973788	34605.4	51543.1	0	1.48945
SPATA21	spermatogenesis associated 21	chr1:16566306-16636506	0.375544	0.561673	0.00126955	1.49563
C10orf54	chromosome 10 open reading frame 54	chr10:72826696-73245708	76.2586	114.059	0.000707549	1.49569
TAGLN	transgelin	chr11:116575249-116580717	148.385	222.537	0.000183753	1.49973
CRYAB	"crystallin, alpha B"	chr11:111284559-111290026	3936.19	5914.52	0	1.5026
TP53INP2	tumor protein p53 inducible nuclear protein 2	chr20:32755803-32764904	578.166	870.024	2.62013e-14	1.5048
LYPD1	LY6/PLAUR domain containing 1	chr2:132890616-133145622	92.7601	140.754	0.00166182	1.5174
FGF1	fibroblast growth factor 1 (acidic)	chr5:141951926-142057801	258.319	392.865	1.658e-07	1.52085
TBC1D26	"TBC1 domain family, member 26"	chr17:15543779-15588820	5.27156	8.01974	0.00310225	1.52132
SERINC4	serine incorporator 4	chr15:41852106-41904243	4.5903	7.01813	0	1.5289
MAFK	v-maf musculoaponeurotic fibrosarcoma oncogene homolog K (avian)	chr7:1536866-1562592	71.5674	109.456	0.000438282	1.52941
SLC39A5	"solute carrier family 39 (metal ion transporter), member 5"	chr12:54910804-54938410	0.487011	0.745439	4.75977e-08	1.53064
TMEM79	transmembrane protein 79	chr1:154485640-154532087	20.6852	31.6886	1.49503e-12	1.53195
KIF1C	kinesin family member 1C	chr17:4841970-4868721	380.015	582.403	9.50964e-11	1.53258
MKNK2	MAP kinase interacting serine/threonine kinase 2	chr19:1988480-2002243	112.678	172.845	0.000426209	1.53397
C19orf68	chromosome 19 open reading frame 68	chr19:53365760-53399021	75.1977	115.938	0.00327923	1.54178
SYCP3	synaptonemal complex protein 3	chr12:100615547-100657378	4.04072	6.23984	7.50317e-06	1.54424
EIF4BP6	eukaryotic translation initiation factor 4B pseudogene 6	chr7:103756463-104183203	65.5305	101.439	0.000237147	1.54797
HIST2H3A	"histone cluster 2, H3c"	chr1:148080128-148124826	1.34546	2.08808	0.00125641	1.55195
SNORD17	"small nucleolar RNA, C/D box 17"	chr20:17870240-17897490	3.3338	5.18406	0	1.555
GDF15	growth differentiation factor 15	chr19:18312396-18526861	1.66609	2.61625	0	1.57029
RNU105A	"RNA, U105A small nucleolar"	chr1:28705082-28738194	5.22417	8.21986	8.65086e-13	1.57343
C22orf15	chromosome 22 open reading frame 15	chr22:22435207-22440141	0.643707	1.01323	1.8418e-08	1.57405
PIP5K1P1	"phosphatidylinositol-4-phosphate 5-kinase, type I, pseudogene 1"	chr6:7672009-8009646	2.86289	4.5127	1.13115e-05	1.57627
TOMM20L	translocase of outer mitochondrial membrane 20 homolog (yeast)-like	chr14:57932385-58085299	0.508573	0.803425	9.20506e-07	1.57976
CALR3	calreticulin 3	chr19:16450877-16600015	0.128993	0.204486	3.06337e-10	1.58525
SPR	"sepiapterin reductase (7,8-dihydrobiopterin:NADP+ oxidoreductase)"	chr2:72968055-72972794	69.1078	109.657	0.00264682	1.58675
RN7SK	"RNA, 7SK small nuclear"	chr6:52968376-52968707	315.525	504.069	6.75382e-11	1.59756
C22orf45	chromosome 22 open reading frame 45	chr22:22996865-23168324	1.1062	1.76877	1.38592e-06	1.59896
S100A13	S100 calcium binding protein A13	chr1:151857898-151885402	637.439	1021.86	0	1.60307
ZBTB12B	zinc finger and BTB domain containing 12B	chr4:39376204-39457977	0.613227	0.983137	1.79039e-06	1.60322
CLDN20	claudin 20	chr6:155453114-155677311	1.85324	2.98109	4.74226e-09	1.60858
NUDT6	nudix (nucleoside diphosphate linked moiety X)-type motif 6	chr4:123967312-124063573	11.8971	19.1392	0.00280319	1.60873
TXNDC11	thioredoxin domain containing 11	chr16:11669801-11744149	56.1964	90.4531	0	1.60959
C10orf108	chromosome 10 open reading frame 108	chr10:311431-725518	1.27402	2.05906	0.000174507	1.61619
DDIT4	DNA-damage-inducible transcript 4	chr10:73703682-73705803	182.471	295.356	3.14366e-07	1.61865
TGFB3	"transforming growth factor, beta 3"	chr14:75494194-75517242	55.4689	90.78	0.00384557	1.63659
OMD	osteomodulin	chr9:94128042-94472368	3.62445	5.98056	0.000680397	1.65006
AURKAPS1	serine/threonine kinase 6 pseudogene | AurAps1 |STK6P | aurora kinase A pseudogene 1	chr1:218388257-218512419	1.37312	2.27369	0	1.65586
PSMC3IP	PSMC3 interacting protein	chr17:37972603-37983375	13.2035	21.9099	1.39194e-06	1.6594
SLC5A2	"solute carrier family 5 (sodium/glucose cotransporter), member 2"	chr16:31401939-31427207	1.11952	1.85918	1.37559e-11	1.66069
C1orf134	chromosome 1 open reading frame 134	chr1:16427756-16428681	98.7645	164.163	6.60311e-05	1.66217
BCAS1	breast carcinoma amplified sequence 1	chr20:51991403-52120491	710.911	1188.2	0	1.67138
POLH	"polymerase (DNA directed), eta"	chr6:43592768-43691375	6.18451	10.347	8.39291e-05	1.67305
ZACN	zinc activated ligand-gated ion channel	chr17:71586903-71611451	0.819032	1.37096	0	1.67388
PYDC1	PYD (pyrin domain) containing 1	chr16:31084765-31144011	29.3826	49.3632	0	1.68001
MRAP	melanocortin 2 receptor accessory protein	chr21:32585994-32687206	31.3347	53.7471	6.21725e-15	1.71526
PPP1R15A	"protein phosphatase 1, regulatory (inhibitor) subunit 15A"	chr19:54067489-54071126	186.96	321.46	3.80177e-09	1.71941
TMEM184A	transmembrane protein 184A	chr7:1536866-1562592	0.189324	0.328784	0.000906255	1.73662
C1QL3	"complement component 1, q subcomponent-like 3"	chr10:16595747-16604010	52.3565	91.6271	0.00123611	1.75006
KCNH6	"potassium voltage-gated channel, subfamily H (eag-related), member 6"	chr17:58954426-59172947	4.53484	7.94874	0	1.75282
NPPA	natriuretic peptide A	chr1:11749385-11909072	41.7489	73.368	0	1.75736
JMJD6	jumonji domain containing 6	chr17:72224362-72234253	46.7478	83.0438	0.00168529	1.77642
CECR4	"cat eye syndrome chromosome region, candidate 4 (non-protein coding)"	chr22:15998410-16026177	3.23406	5.75639	0	1.77993
KCNG1	"potassium voltage-gated channel, subfamily G, member 1"	chr20:49053600-49073082	59.9339	106.693	0.000353408	1.78018
GPR52	G protein-coupled receptor 52	chr1:172395170-173226353	2.54755	4.53892	0.00212448	1.78168
TPSG1	tryptase gamma 1	chr16:1143738-1215257	0.234514	0.418159	9.85529e-07	1.78309
TNNT1	"troponin T type 1 (skeletal, slow)"	chr19:60336007-60352385	76.0574	135.742	5.25293e-05	1.78473
NPHS1	"nephrosis 1, congenital, Finnish type (nephrin)"	chr19:40939937-41034579	1.65036	2.95367	6.14009e-08	1.78971
C10orf105	chromosome 10 open reading frame 105	chr10:72826696-73245708	3.22791	5.80009	0.000715076	1.79686
CTNNA3	"catenin (cadherin-associated protein), alpha 3"	chr10:67349874-69125933	6.17229	11.0997	5.23078e-05	1.79831
TSPAN10	tetraspanin 10	chr17:77134358-77226781	0.509691	0.926684	0	1.81813
PAIP2B	poly(A) binding protein interacting protein 2B	chr2:71268943-71307709	81.216	148.138	1.34226e-05	1.824
SNORA67	"small nucleolar RNA, H/ACA box 67"	chr17:7393098-7426152	0.201043	0.367382	0	1.82738
RSPH9	radial spoke head 9 homolog (Chlamydomonas)	chr6:43720771-43763506	12.6659	23.3208	1.67164e-11	1.84123
TJP3	tight junction protein 3 (zona occludens 3)	chr19:3441823-3723219	1.71191	3.18852	0	1.86255
CDKN1A	"cyclin-dependent kinase inhibitor 1A (p21, Cip1)"	chr6:36754464-36763086	48.4594	90.6155	0.0004367	1.86993
FAM32B	"family with sequence similarity 32, member B (pseudogene)"	chr16:55075800-55111696	2.44463	4.60549	0	1.88392
MIR637	microRNA 637	chr19:3909451-3920826	20.5801	39.0722	0	1.89854
C14orf178	chromosome 14 open reading frame 178	chr14:77253698-77305838	1.21829	2.42082	4.44089e-16	1.98706
PGC	progastricsin (pepsinogen C)	chr6:41759693-41823099	0.912452	1.82068	1.1093e-08	1.99537
C1orf167	chromosome 1 open reading frame 167	chr1:11749385-11909072	0.164959	0.330568	0	2.00394
CCRL1	chemokine (C-C motif) receptor-like 1	chr3:133759671-133923993	0.517561	1.05196	4.88365e-12	2.03253
PTMAP5	prothymosin, alpha pseudogene 5 (gene sequence 150) | prothymosin, alpha pseudogene 5	chr13:81162046-81163208	1197.5	2452.94	0	2.04838
HIPK2	homeodomain interacting protein kinase 2	chr7:138907914-139123984	47.4472	97.2321	5.22408e-05	2.04927
LRP2BP	LRP2 binding protein	chr4:186368277-186537146	8.76079	18.414	0.00175962	2.10187
MIR922	microRNA 922	chr3:198882655-198948170	0.0306266	0.0654743	0	2.13782
CARTPT	CART prepropeptide	chr5:71050749-71052628	68.0513	145.854	2.06948e-07	2.14329
KCTD4	potassium channel tetramerisation domain containing 4	chr13:44592655-44756237	50.976	109.325	2.94524e-09	2.14464
CLDN7	claudin 7	chr17:7096095-7106520	0.367423	0.810245	0	2.20521
PNMA5	paraneoplastic antigen like 5	chrX:151908024-151911417	36.6059	83.6042	3.0844e-05	2.2839
DLEC1	deleted in lung and esophageal cancer 1	chr3:38055699-38153619	1.26504	2.92881	2.07669e-09	2.31519
RAX2	retina and anterior neural fold homeobox 2	chr19:3441823-3723219	1.04522	2.45726	0	2.35095
C9orf128	chromosome 9 open reading frame 128	chr9:35802956-35844844	0.425442	1.00543	0	2.36326
SNORA73A	"small nucleolar RNA, H/ACA box 73A"	chr1:28705082-28738194	4.4602	11.0592	0	2.47953
GRIK1-AS1	GRIK1 antisense RNA 1 (non-protein coding)	chr21:29831124-30234211	1.57773	3.92157	2.22045e-16	2.48558
OR4N4	"olfactory receptor, family 4, subfamily N, member 4"	chr15:19793226-19942240	0.163308	0.435878	5.27191e-06	2.66905
TSPAN16	tetraspanin 16	chr19:11267823-11311321	0.665885	1.79075	1.54491e-07	2.68928
LRRC53	leucine rich repeat containing 53	chr1:74436513-74782696	0.531055	1.44813	2.19526e-07	2.72689
POTEJ	"POTE ankyrin domain family, member J"	chr2:131085523-131132169	0.0272452	0.0752757	0.000106983	2.7629
STAG3	stromal antigen 3	chr7:99613473-99707766	6.86702	19.0876	0	2.7796
SCT	secretin	chr11:616312-630703	1.32528	3.79038	7.59708e-07	2.86006
KCNMB1	"potassium large conductance calcium-activated channel, subfamily M, beta member 1"	chr5:169713458-170096212	1.60594	4.71253	0	2.93444
DENND1B	DENN/MADD domain containing 1B	chr1:195745396-196011078	0.736959	2.29478	5.28953e-07	3.11385
DNAJB1	"DnaJ (Hsp40) homolog, subfamily B, member 1"	chr19:14486581-14490201	609.7	1966.36	0	3.22513
ANXA8L1	annexin A8	chr10:46511544-46679689	0.558979	2.27353	0.000328103	4.06729
HSPA1A	heat shock 70kDa protein 1A	chr6:31891298-31893702	1216.93	5154.74	0	4.23586
HSPB1	heat shock 27kDa protein 1	chr7:75769858-75771548	882.683	4082.36	0	4.62494
G0S2	G0/G1switch 2	chr1:207915387-207916355	17.7104	91.2654	2.70868e-10	5.15321
GSG2	germ cell associated 2 (haspin)	chr17:3564671-3651293	0.0460047	0.244515	1.24465e-09	5.315
PKD2L2	polycystic kidney disease 2-like 2	chr5:137253023-137396701	0.0383692	0.207415	0	5.40577
BAG3	BCL2-associated athanogene 3	chr10:121400871-121427317	60.1249	374.564	0	6.22977
SERPINH1	"serpin peptidase inhibitor, clade H (heat shock protein 47), member 1, (collagen binding protein 1)"	chr11:74950817-74961492	32.9094	235.464	0	7.15492
HSPA6	heat shock 70kDa protein 6 (HSP70B')	chr1:159760659-159763305	12.4254	183.103	0	14.7362
PPP3R2	"protein phosphatase 3, regulatory subunit B, beta"	chr9:103371455-103540683	0.332548	0	0	NA
ACOXL	acyl-CoA oxidase-like	chr2:111206679-111568392	0	0.862701	0	NA
C12orf33	chromosome 12 open reading frame 33	chr12:9096692-9160020	0	0.52075	0	NA
C17orf78	chromosome 17 open reading frame 78	chr17:32516035-32841015	0	0.423622	0	NA
C1orf200	chromosome 1 open reading frame 200	chr1:9634376-9807137	0	0.30858	0	NA
C20orf144	chromosome 20 open reading frame 144	chr20:31708554-31725925	1.20979	0	0	NA
C6orf103	chromosome 6 open reading frame 103	chr6:146961828-147178291	0	0.847784	0	NA
COX8C	cytochrome c oxidase subunit 8C	chr14:92869317-93243442	1.3867	0	0	NA
CPB2	carboxypeptidase B2 (plasma)	chr13:45525322-45577212	0	0.699127	0	NA
DNAH12	"dynein, axonemal, heavy chain 12"	chr3:57429634-57505108	0.503049	0	0	NA
EFCAB3	EF-hand calcium binding domain 3	chr17:57811645-57847569	0	0.314044	0	NA
EMR3	"egf-like module containing, mucin-like, hormone receptor-like 3"	chr19:14591051-14646730	0.393962	0	0	NA
FAM154A	"family with sequence similarity 154, member A"	chr9:18917889-19023251	0	0.342963	0	NA
FAM71C	"family with sequence similarity 71, member C"	chr12:97653468-98902563	0	0.422392	0	NA
FSD2	fibronectin type III and SPRY domain containing 2	chr15:81191705-81412481	0.224564	0	0	NA
FUNDC2P3	FUN14 domain containing 2 pseudogene 3 |FLJ37060	chr6:146390610-146800427	0	2.15216	0	NA
GPR171	G protein-coupled receptor 171	chr3:152287365-152634500	0	0.424665	0	NA
HIST1H3H	"histone cluster 1, H3a"	chr6:27885820-27969644	6.04955	0	0	NA
HSPD1P10	HSPD1-4P |HSPD1-4P | heat shock 60kDa protein 1 (chaperonin) pseudogene 10	chr6:88049416-88108762	0.573163	0	0	NA
KRT18P10	keratin 18 pseudogene 10	chr17:56109997-56824973	0	0.451924	0	NA
KRT18P12	keratin 18 pseudogene 12	chr1:212597713-212791574	0.77112	0	0	NA
MIR1181	microRNA 1181	chr19:10362808-10375271	0.000242459	0	0	NA
MIR1182	microRNA 1182	chr1:229221557-229242608	0.0415063	0	0	NA
MIR1304	microRNA 1304	chr11:93034524-93114308	31.2599	0	0	NA
MIR935	microRNA 935	chr19:59158105-59177951	0.0516703	0	0	NA
NCRNA00169	non-protein coding RNA 169	chr16:21177342-21237413	0	0.301296	0	NA
PDE6A	"phosphodiesterase 6A, cGMP-specific, rod, alpha"	chr5:149220420-149304549	0.442449	0	0	NA
PHOX2A	paired-like homeobox 2a	chr11:71613472-71632852	0.565895	0	0	NA
PRAMEF11	PRAME family member 11	chr1:12774132-12844828	0.0709338	0	0	NA
RNF113B	ring finger protein 113B	chr13:97593434-97900017	0	0.532893	0	NA
RNF133	ring finger protein 133	chr7:121745716-122313790	0	0.630025	0	NA
SLC22A25	"solute carrier family 22, member 25"	chr11:62687871-62753700	0	0.767033	0	NA
SMAD5OS	SMAD family member 5 opposite strand	chr5:135493103-135546321	0	0.574261	0	NA
SNORA10	"small nucleolar RNA, H/ACA box 10"	chr16:1952062-1954828	5.97913	0	0	NA
SNORA11D	"small nucleolar RNA, H/ACA box 11D"	chrX:51944658-51952104	6.80987	0	0	NA
SNORA11E	"small nucleolar RNA, H/ACA box 11E"	chrX:51821662-51829108	6.99687	0	0	NA
SNORA15	"small nucleolar RNA, H/ACA box 15"	chr7:56086871-56099176	0	3.02132	0	NA
SNORA33	"small nucleolar RNA, H/ACA box 33"	chr6:133177373-133180396	8.59384	0	0	NA
SNORA48	"small nucleolar RNA, H/ACA box 48"	chr17:7393098-7426152	12.0784	0	0	NA
SNORA52	"small nucleolar RNA, H/ACA box 52"	chr11:799935-802876	0	14.5229	0	NA
SNORA53	"small nucleolar RNA, H/ACA box 53"	chr12:97511533-97519906	5.9263	0	0	NA
SNORA60	"small nucleolar RNA, H/ACA box 60"	chr20:36508738-36512978	9.01172	0	0	NA
SNORA7B	"small nucleolar RNA, H/ACA box 7B"	chr3:130584457-130601009	7.70494	0	0	NA
SNORD14D	"small nucleolar RNA, C/D box 14D"	chr11:122433412-122438054	52.9026	0	0	NA
SNORD14E	"small nucleolar RNA, C/D box 14E"	chr11:122433412-122438054	0	80.0863	0	NA
SNORD83B	"small nucleolar RNA, C/D box 83B"	chr22:38038832-38045616	27.0346	0	0	NA
TCTEX1D4	Tctex1 domain containing 4	chr1:45038622-45045544	0.813031	0	0	NA
TMSB4XP2	"thymosin beta 4, X-linked pseudogene 2"	chr2:3620419-3669911	0	0.163047	0	NA
WDR38	WD repeat domain 38	chr9:126655575-126664061	0.641841	0	0	NA
ZNF729	zinc finger protein 729	chr19:22261091-22661215	0.154478	0	0	NA
All these genes reach the significant threshold of FDR < 0.05; gene symbols in bold are genes also in the SZGene list by linkage/association studies.
The genes are ranked by their fold changes; fold changes are calculated as the ratio of the RPKM between cases and contorls
"-" represents for downregulation in cases and "NA" indicates genes expressed in only one group.
