# Supplementary material for: Transcriptome Sequencing Revealed Significant Alteration of Cortical Promoter Usage and Splicing in Schizophrenia
Source: PLoS One. 2012 Apr 27;7(4):e36351. doi: 10.1371/journal.pone.0036351 (PMC3338678; doi:10.1371/journal.pone.0036351)
Supplement: Table S2 — Enriched GO terms in differentially expressed genes. (XLS) [file pone.0036351.s002.xls]

## Sheet: Sheet1
Table S2. Enriched GO terms in differentially expressed genes
GO ID	GO term	p value	FDR	%a
GO:0006414	translational elongation	2.8e-12	2.8e-08	27.2
GO:0005829	cytosol	7.2e-09	3.6e-05	7
GO:0006754	ATP biosynthetic process	5.25e-08	0.0001751	19.5
GO:0003735	structural constituent of ribosome	1.11e-07	0.0002422	17.4
GO:0006986	response to unfolded protein	1.45e-07	0.0002422	22.6
GO:0005840	ribosome	1.45e-07	0.0002422	14.8
GO:0005743	mitochondrial inner membrane	2.63e-07	0.0003768	13.4
GO:0005747	mitochondrial respiratory chain complex I	5.18e-07	0.0006489	30.8
GO:0045202	synapse	7.36e-07	0.0008146	8.3
GO:0022627	cytosolic small ribosomal subunit	8.14e-07	0.0008146	33.3
GO:0051082	unfolded protein binding	1.22e-06	0.0010442	15.7
GO:0005874	microtubule	1.25e-06	0.0010442	8.8
GO:0070469	respiratory chain	1.38e-06	0.0010599	24.2
GO:0048471	perinuclear region of cytoplasm	1.59e-06	0.0011392	8.5
GO:0005753	mitochondrial proton-transporting ATP synthase complex	2.63e-06	0.001756	53.3
GO:0005739	mitochondrion	3.27e-06	0.0020451	6.5
GO:0005515	protein binding	3.58e-06	0.0021091	4.5
GO:0022900	electron transport chain	6.37e-06	0.0035447	16.7
GO:0006811	ion transport	7.36e-06	0.003685	6.4
GO:0007268	synaptic transmission	7.36e-06	0.003685	9.9
GO:0004129	cytochrome-c oxidase activity	1.03e-05	0.0046867	34.8
GO:0006120	mitochondrial electron transport, NADH to ubiquinone	1.06e-05	0.0046867	27.8
GO:0008219	cell death	1.08e-05	0.0046867	5.2
GO:0006412	translation	1.32e-05	0.0054978	9
GO:0009408	response to heat	1.5e-05	0.0058551	18
GO:0006810	transport	1.52e-05	0.0058551	5.5
GO:0046933	hydrogen ion transporting ATP synthase activity, rotational mechanism	1.6e-05	0.0059307	46.2
GO:0008137	NADH dehydrogenase (ubiquinone) activity	1.67e-05	0.0059577	27
GO:0030054	cell junction	1.78e-05	0.0060636	6.1
GO:0007018	microtubule-based movement	1.82e-05	0.0060636	13.5
GO:0006457	protein folding	2.1e-05	0.006772	12.9
GO:0006172	ADP biosynthetic process	2.22e-05	0.0069581	80
GO:0031410	cytoplasmic vesicle	2.54e-05	0.0077131	7
GO:0050750	low-density lipoprotein receptor binding	3.22e-05	0.0094704	41.7
GO:0051412	response to corticosterone stimulus	4.09e-05	0.0112892	33.3
GO:0022625	cytosolic large ribosomal subunit	4.1e-05	0.0112892	27.3
GO:0000275	mitochondrial proton-transporting ATP synthase complex, catalytic core F(1)	4.17e-05	0.0112892	83.3
GO:0005737	cytoplasm	4.79e-05	0.012622	4.8
GO:0005890	sodium:potassium-exchanging ATPase complex	5.6e-05	0.0143735	57.1
GO:0019905	syntaxin binding	7.26e-05	0.0181779	33.3
GO:0042776	mitochondrial ATP synthesis coupled proton transport	8.3e-05	0.0202715	50
GO:0007399	nervous system development	9.39e-05	0.0223944	6.8
GO:0051087	chaperone binding	0.000103592	0.0238439	22.6
GO:0042989	sequestering of actin monomers	0.000104777	0.0238439	66.7
GO:0016820	hydrolase activity, acting on acid anhydrides, catalyzing transmembrane movement of substances	0.000116342	0.0258873	12.1
GO:0022857	transmembrane transporter activity	0.000119016	0.0259066	6.3
GO:0046961	proton-transporting ATPase activity, rotational mechanism	0.000123616	0.0263355	33.3
GO:0042470	melanosome	0.000136544	0.0284836	12.6
GO:0010243	response to organic nitrogen	0.000147219	0.0295826	11.5
GO:0019904	protein domain specific binding	0.000147721	0.0295826	6.5
GO:0005391	sodium:potassium-exchanging ATPase activity	0.000208651	0.0403928	44.4
GO:0005509	calcium ion binding	0.00020977	0.0403928	6.2
GO:0005883	neurofilament	0.000234242	0.043592	50
GO:0008021	synaptic vesicle	0.000235091	0.043592	17.1
GO:0006091	generation of precursor metabolites and energy	0.000251882	0.0458562	13.7
GO:0006898	receptor-mediated endocytosis	0.000283957	0.0507725	10.8
GO:0019717	synaptosome	0.000297311	0.0522277	11
GO:0043218	compact myelin	0.000306186	0.0528593	75
GO:0032403	protein complex binding	0.000426576	0.072395	5.7
GO:0008366	axon ensheathment	0.000446963	0.0745906	9.8
GO:0035259	glucocorticoid receptor binding	0.000458939	0.0753338	50
GO:0030424	axon	0.000469357	0.0758012	11
GO:0003777	microtubule motor activity	0.000512788	0.0815007	10.5
GO:0017157	regulation of exocytosis	0.000601884	0.0936187	16.3
GO:0043025	neuronal cell body	0.000613957	0.0936187	8.6
GO:0048156	tau protein binding	0.000617081	0.0936187	60
GO:0030388	fructose 1,6-bisphosphate metabolic process	0.000632867	0.0945805	50
GO:0051258	protein polymerization	0.00064892	0.0955535	11
GO:0016887	ATPase activity	0.000664459	0.0964235	5.9
GO:0030235	nitric-oxide synthase regulator activity	0.000702617	0.0999231	50
GO:0035253	ciliary rootlet	0.000708533	0.0999231	37.5
GO:0051591	response to cAMP	0.000778201	0.108224	18.2
GO:0060052	neurofilament cytoskeleton organization	0.000912199	0.125121	50
GO:0007409	axonogenesis	0.000968715	0.129611	8.5
GO:0017075	syntaxin-1 binding	0.00097082	0.129611	37.5
GO:0050771	negative regulation of axonogenesis	0.000989016	0.130303	17.9
GO:0006936	muscle contraction	0.00104844	0.136339	7.9
GO:0014070	response to organic cyclic substance	0.00106646	0.136903	6.8
GO:0002021	response to dietary excess	0.00120612	0.152872	25
GO:0030672	synaptic vesicle membrane	0.00130393	0.163203	16.3
GO:0007417	central nervous system development	0.00142617	0.176299	5.8
GO:0032981	mitochondrial respiratory chain complex I assembly	0.00144474	0.176417	36.4
GO:0006813	potassium ion transport	0.00157254	0.187543	8.3
GO:0008217	regulation of blood pressure	0.00157332	0.187543	8.4
GO:0005198	structural molecule activity	0.00163519	0.192625	8.8
GO:0042995	cell projection	0.00165969	0.193238	6
GO:0042288	MHC class I protein binding	0.00184068	0.211847	50
GO:0030036	actin cytoskeleton organization	0.00195641	0.222608	4.7
GO:0051117	ATPase binding	0.00199438	0.224379	26.7
GO:0042802	identical protein binding	0.00202007	0.224743	5.4
GO:0050803	regulation of synapse structure and activity	0.00212175	0.232988	14.3
GO:0005215	transporter activity	0.00215392	0.232988	6.4
GO:0030529	ribonucleoprotein complex	0.00216744	0.232988	8.2
GO:0005248	voltage-gated sodium channel activity	0.00218724	0.232988	21.4
GO:0007420	brain development	0.00232613	0.245174	5.5
GO:0042584	chromaffin granule membrane	0.00248579	0.259274	50
GO:0003774	motor activity	0.00257197	0.265497	9.3
GO:0006950	response to stress	0.00272664	0.27859	5
GO:0004351	glutamate decarboxylase activity	0.00288645	0.290767	66.7
GO:0030182	neuron differentiation	0.0029039	0.290767	6.9
GO:0045581	negative regulation of T cell differentiation	0.00302349	0.299744	16.7
GO:0010977	negative regulation of neuron projection development	0.00342645	0.329794	30.8
GO:0043524	negative regulation of neuron apoptosis	0.00343198	0.329794	13
GO:0005516	calmodulin binding	0.00345136	0.329794	7.2
GO:0006119	oxidative phosphorylation	0.00345834	0.329794	24.1
GO:0030141	stored secretory granule	0.00391981	0.367272	8.5
GO:0007269	neurotransmitter secretion	0.00397376	0.367272	13.7
GO:0033081	regulation of T cell differentiation in the thymus	0.00398106	0.367272	22.2
GO:0030911	TPR domain binding	0.00403073	0.367272	66.7
GO:0015992	proton transport	0.00403475	0.367272	15.8
GO:0014012	axon regeneration in the peripheral nervous system	0.00428072	0.385368	50
GO:0005794	Golgi apparatus	0.00431052	0.385368	5.1
GO:0004857	enzyme inhibitor activity	0.00441107	0.390868	6.3
%a: number of genes in the GO term present in DEGs / total number of genes in the GO term × 100
