# Supplementary material for: Transcriptome Sequencing Revealed Significant Alteration of Cortical Promoter Usage and Splicing in Schizophrenia
Source: PLoS One. 2012 Apr 27;7(4):e36351. doi: 10.1371/journal.pone.0036351 (PMC3338678; doi:10.1371/journal.pone.0036351)
Supplement: Table S3 — Differentially expressed genes contributed to the enrichment of 3 GO terms in cluster 4 neurotransmission related functions. (XLS) [file pone.0036351.s003.xls]

## Sheet: SupFile3
Table S3. Differentially expressed genes (FDR<0.05) contributed to the enrichment of 3 GO terms in cluster 4 neurotransmission related functions
Gene	Description	RPKM_ctrl	RPKM_case	Fold change
PTGS2	prostaglandin-endoperoxide synthase 2 (prostaglandin G/H synthase and cyclooxygenase)	40.02	12.0165	-3.33042
FOS	FBJ murine osteosarcoma viral oncogene homolog	403.471	132.927	-3.03528
ARC	activity-regulated cytoskeleton-associated protein	407.758	149.617	-2.72535
UTS2	urotensin 2	0.426548	0.169167	-2.52146
VAMP1	vesicle-associated membrane protein 1 (synaptobrevin 1)	852.239	515.595	-1.65292
SCN1B	"sodium channel, voltage-gated, type I, beta"	2344.33	1428.91	-1.64064
EGR1	early growth response 1	425.441	280.933	-1.51439
SST	somatostatin	919.959	620.19	-1.48335
HCRTR1	hypocretin (orexin) receptor 1	5.00191	3.58947	-1.3935
GABRD	"gamma-aminobutyric acid (GABA) A receptor, delta"	1036.2	773.939	-1.33887
CHRNE	"cholinergic receptor, nicotinic, epsilon"	4.89186	3.65653	-1.33784
VGF	VGF nerve growth factor inducible	1012.89	757.464	-1.33721
GAD1	"glutamate decarboxylase 1 (brain, 67kDa)"	352.419	271.716	-1.29701
RPH3A	rabphilin 3A homolog (mouse)	488.962	381.923	-1.28026
LGI3	"leucine-rich repeat LGI family, member 3"	803.754	667.397	-1.20431
PPP3CA	"protein phosphatase 3, catalytic subunit, alpha isozyme"	666.992	554.688	-1.20246
PRKACA	"protein kinase, cAMP-dependent, catalytic, alpha"	617.313	515.203	-1.19819
PPT1	palmitoyl-protein thioesterase 1	630.851	529.976	-1.19034
CPLX1	complexin 1	1973.65	1682.13	-1.1733
CNP	"2',3'-cyclic nucleotide 3' phosphodiesterase"	2085.82	1790.15	-1.16516
SYT1	synaptotagmin I	1847.45	1653.29	-1.11744
SNAP25	"synaptosomal-associated protein, 25kDa"	10240.9	9293.3	-1.10197
PLP1	proteolipid protein 1	5116.73	4644.55	-1.10166
APOE	apolipoprotein E	3767.33	4023.35	1.06796
2005-09-01	septin 5	3688.95	3942.17	1.06864
PEBP1	phosphatidylethanolamine binding protein 1	5376.96	5753.17	1.06997
YWHAH	"tyrosine 3-monooxygenase/tryptophan 5-monooxygenase activation protein, eta polypeptide"	5097.31	5527.13	1.08432
APP	amyloid beta (A4) precursor protein	3877.14	4242	1.09411
SYP	synaptophysin	4729.72	5589.18	1.18171
SNCA	"synuclein, alpha (non A4 component of amyloid precursor)"	1124.87	1336.13	1.18781
GABRA5	"gamma-aminobutyric acid (GABA) A receptor, alpha 5"	252.443	302.336	1.19764
NPTX1	neuronal pentraxin I	621.389	758.384	1.22047
SYN2	synapsin II	345.225	425.994	1.23396
BAIAP3	BAI1-associated protein 3	264.893	327.98	1.23816
PRKCG	"protein kinase C, gamma"	407.433	508.157	1.24722
SNCG	"synuclein, gamma (breast cancer-specific protein 1)"	2502.29	3255.68	1.30108
NPTX2	neuronal pentraxin II	307.978	447.699	1.45367
MBP	myelin basic protein	34605.4	51543.1	1.48945
CARTPT	CART prepropeptide	68.0513	145.854	2.14329
KCNMB1	"potassium large conductance calcium-activated channel, subfamily M, beta member 1"	1.60594	4.71253	2.93444
