# Supplementary material for: Transcriptome Sequencing Revealed Significant Alteration of Cortical Promoter Usage and Splicing in Schizophrenia
Source: PLoS One. 2012 Apr 27;7(4):e36351. doi: 10.1371/journal.pone.0036351 (PMC3338678; doi:10.1371/journal.pone.0036351)
Supplement: Table S6 — Genes with significant alternative promoter usage (FDR<0.05) between schizophrenia cases and controls. (XLS) [file pone.0036351.s006.xls]

## Sheet: Sheet1
Table S6. Genes with significant alternative promoter usage (FDR<0.05) between schizophrenia cases and controls
Gene symbol	Locus	p value
ABCG1	chr21:42492867-42590423	0
ABHD12	chr20:25176705-25319477	0
ABI1	chr10:27026600-27189965	0
ABL2	chr1:177335084-177465155	0
ACACA	chr17:32516035-32841015	0
ADAMTSL1	chr9:18464097-18900948	0
ADARB1	chr21:45318195-45470903	0
AFF2	chrX:147389830-147889899	0
AGTRAP	chr1:11718728-11733412	0
AHI1	chr6:135646816-135871912	0
ALS2CR4	chr2:202193151-202216485	0
AMPD2	chr1:109963981-109976198	0
ANK1	chr8:41629900-41873155	0
ANK3	chr10:61458164-61819494	0
ANKHD1	chr5:139761612-139909347	0
ANKZF1	chr2:219802722-219827574	0
APBB3	chr5:139918037-139924373	0
APITD1	chr1:10412745-10434797	0
APOM	chr6:31714783-31733965	0
ARHGAP19	chr10:98747784-99042403	0
ARHGAP32	chr11:128343051-128567303	0
ARHGEF7	chr13:110565782-110756079	0
ARMC2	chr6:109276311-109402045	0
ARMC8	chr3:139388837-139530895	0
ARVCF	chr22:18337420-18384309	0
ASPH	chr8:62578373-62789672	0
ATF2	chr2:175645223-175741180	0
ATP2A1	chr16:28797303-28844033	0
BAALC	chr8:104222096-104380152	0
BCAS1	chr20:51991403-52120491	0
BCAS3	chr17:56109997-56824973	0
BCKDK	chr16:31024928-31031420	0
BCR	chr22:21852551-21990224	0
BID	chr22:16596907-16637263	0
BRCC3	chrX:153943090-154037972	0
BRD1	chr22:48552934-48607164	0
BRE	chr2:27966985-28415272	0
BRP44L	chr6:166698399-166716476	0
C10orf128	chr10:50032780-50066442	0
C10orf76	chr10:103595345-103805940	0
C1orf59	chr1:108992434-109019338	0
C1orf9	chr1:170768111-170847594	0
C1orf91	chr1:32447281-32460536	0
C20orf112	chr20:30498329-30660356	0
C20orf117	chr20:34839258-34925503	0
C21orf91	chr21:18083155-18113574	0
C22orf13	chr22:23266409-23354972	0
C22orf36	chr22:23266409-23354972	0
C6orf170	chr6:121442325-121697343	0
C6orf204	chr6:118892931-119137924	0
C6orf70	chr6:169878919-169923605	0
C9orf100	chr9:35648300-35659610	0
C9orf174	chr9:99040599-99179390	0
C9orf24	chr9:34369016-34387849	0
C9orf25	chr9:34388181-34448568	0
C9orf72	chr9:27536543-27563842	0
CAB39L	chr13:48780789-48964298	0
CABP1	chr12:119562804-119589508	0
CACNB1	chr17:34583234-34607428	0
CACNB2	chr10:18469611-18870797	0
CALM3	chr19:51796351-51805878	0
CAMK2D	chr4:114591636-114902177	0
CANT1	chr17:74499393-74517455	0
CAP1	chr1:40278491-40310908	0
CARS	chr11:2978727-3035247	0
CASP2	chr7:142695523-142714906	0
CASP7	chr10:115428924-115480652	0
CASP9	chr1:15675182-15723527	0
CBR1	chr21:36328708-36373557	0
CCDC107	chr9:35648300-35659610	0
CCDC136	chr7:128218783-128249419	0
CCDC157	chr22:29057978-29102818	0
CCDC30	chr1:42701611-42892444	0
CCDC55	chr17:25292811-25537617	0
CD200	chr3:113534605-113564346	0
CD320	chr19:7929457-8459885	0
CD72	chr9:35595280-35609539	0
CDC14B	chr9:98298389-98421933	0
CDC40	chr6:110608036-110786168	0
CDKN1B	chr12:12761575-12766569	0
CEP110	chr9:122876961-122979709	0
CGREF1	chr2:27163114-27195487	0
CHN1	chr2:175372336-175578361	0
CHST12	chr7:2261166-2440740	0
CIZ1	chr9:129968164-130057348	0
CLASP2	chr3:33512744-33734852	0
CLCN6	chr1:11749385-11909072	0
CLDN10	chr13:94883858-95094958	0
CLK1	chr2:201416153-201437667	0
CLSTN3	chr12:7174233-7202793	0
CLU	chr8:27491965-27528215	0
CNP	chr17:37372284-37459533	0
CNTN4	chr3:2255512-3074645	0
COL4A2	chr13:109757614-109963375	0
COL6A2	chr21:46342460-46377189	0
COL9A1	chr6:70982528-71069494	0
COLEC11	chr2:3620419-3669911	0
COPS7B	chr2:232354624-232381679	0
COX7A2L	chr2:42429981-42449654	0
CPLX2	chr5:175156215-175243629	0
CPT1B	chr22:49354155-49368260	0
CRTAC1	chr10:99599985-99780575	0
CTNNBIP1	chr1:9830920-9892908	0
CUL2	chr10:35337484-35419576	0
CUX1	chr7:101246011-101713969	0
CYB5R3	chr22:41344764-41375349	0
CYP2E1	chr10:135190856-135232866	0
DAAM1	chr14:58725151-58907876	0
DAB1	chr1:57233038-58488763	0
DACH1	chr13:70910098-71339331	0
DCX	chrX:110423662-110542259	0
DERL3	chr22:22459149-22511201	0
DGUOK	chr2:74007460-74039596	0
DHRS4L2	chr14:23527866-23545457	0
DIP2A	chr21:46703239-46814049	0
DLG1	chr3:198253827-198509844	0
DLG4	chr17:7033932-7063781	0
DNAH17	chr17:73886329-74085071	0
DNAH7	chr2:196310671-196643975	0
DNAJB2	chr2:219852283-219861207	0
DNM1	chr9:129968164-130057348	0
DOPEY2	chr21:36458702-36588442	0
DTNB	chr2:25453615-25750007	0
DTNBP1	chr6:15631019-15771250	0
DYRK1A	chr21:37661748-37809550	0
DZIP1	chr13:94883858-95094958	0
ECE1	chr1:21417663-21544584	0
ECHDC1	chr6:127651549-127706447	0
EEF1D	chr8:144733040-144750726	0
EIF2A	chr3:151747208-151786492	0
EIF3D	chr22:35214234-35255223	0
ELAVL1	chr19:7929457-8459885	0
ELAVL4	chr1:50342168-50442045	0
ENSG00000064012	chr2:201806410-201860679	0
ENSG00000112493	chr6:33375448-33390114	0
ENSG00000126005	chr20:33330138-33336008	0
ENSG00000133511	chr22:19391980-19543070	0
ENSG00000133678	chr10:81828400-81842286	0
ENSG00000137343	chr6:30702597-30722582	0
ENSG00000179036	chr17:8003145-8007017	0
ENSG00000198563	chr6:31604717-31622606	0
ENSG00000198744	chrM:8366-9988	0
ENSG00000204248	chr6:33238435-33268254	0
ENSG00000204364	chr6:32003472-32027840	0
ENSG00000204463	chr6:31714783-31733965	0
ENSG00000213760	chr6:31604717-31622606	0
EPB41	chr1:29086214-29323008	0
EPB41L4B	chr9:110974074-111122842	0
ERC1	chr12:970664-1475360	0
ERCC2	chr19:50535837-50565675	0
EWSR1	chr22:27994016-28026515	0
EXD2	chr14:68727980-68778828	0
EXOC1	chr4:56414572-56466001	0
FAM117B	chr2:203208453-203342725	0
FAM120A	chr9:95248603-95368218	0
FAM120AOS	chr9:95248603-95368218	0
FAM58A	chrX:152506578-152517780	0
FAM82A1	chr2:38005933-38147784	0
FBXL13	chr7:102240915-102502453	0
FBXO18	chr10:5972199-6019562	0
FBXO2	chr1:11631032-11645971	0
FGF1	chr5:141951926-142057801	0
FGFR1	chr8:38387812-38445509	0
FGFR2	chr10:123223888-123347962	0
FHAD1	chr1:15435807-15597210	0
FILIP1L	chr3:101019513-101380136	0
FOXP2	chr7:113841564-114121063	0
FRS2	chr12:68150395-68259826	0
FRY	chr13:31503436-31768776	0
FUBP1	chr1:78126787-78217365	0
FUBP3	chr9:132444780-132503560	0
FUS	chr16:31084765-31144011	0
FYN	chr6:112089189-112301320	0
GAP43	chr3:116824860-116923024	0
GATS	chr7:99613473-99707766	0
GCK	chr7:44150394-44195563	0
GGT1	chr22:23266409-23354972	0
GIGYF2	chr2:233270258-233433529	0
GLB1L	chr2:219802722-219827574	0
GLUL	chr1:180617461-180627964	0
GPAT2	chr2:96051421-96064454	0
GPM6B	chrX:13698982-13866758	0
GRIA3	chrX:122145686-122452447	0
GRIK1	chr21:29831124-30234211	0
GRIPAP1	chrX:48715077-48743619	0
GSDMB	chr17:35314373-35328429	0
GSTCD	chr4:106823232-106988331	0
GTDC1	chr2:144419790-144806499	0
GUK1	chr1:226394285-226403308	0
HADH	chr4:109130318-109175780	0
HMG20B	chr19:3441823-3723219	0
HMGCLL1	chr6:55407126-55551971	0
HNRNPU	chr1:243080224-243094450	0
HPS4	chr22:25177445-25209820	0
HSP90AB1	chr6:44322801-44329598	0
HSPE1	chr2:198059554-198076351	0
IL18BP	chr11:71387234-71469221	0
IL4R	chr16:27232751-27283600	0
INTS12	chr4:106823232-106988331	0
ITGB1BP1	chr2:9264344-9481094	0
ITM2B	chr13:47705308-47734226	0
JAKMIP1	chr4:6078826-6253219	0
KANK3	chr19:7929457-8459885	0
KCNAB2	chr1:5845456-6083840	0
KCNJ13	chr2:233270258-233433529	0
KCNMA1	chr10:78307360-79068133	0
KDM1A	chr1:23218532-23282771	0
KDM5B	chr1:200963155-201045186	0
KIAA0802	chr18:8696512-8822776	0
KIAA1217	chr10:24023680-24876778	0
KIAA2013	chr1:11749385-11909072	0
KLK6	chr19:56153699-56164741	0
KMO	chr1:239762056-239870324	0
KSR1	chr17:22807796-22974545	0
LARGE	chr22:31998846-32646410	0
LFNG	chr7:2518688-2535334	0
LIMK2	chr22:29938249-30006066	0
LIMS1	chr2:108571198-108670134	0
LITAF	chr16:11549356-11588289	0
LPIN1	chr2:11781928-11884982	0
LRRC17	chr7:102240915-102502453	0
LRRC20	chr10:71728734-71812388	0
LSM14B	chr20:60130911-60143829	0
LYPLA2	chr1:23990232-23994614	0
MAD2L2	chr1:11657124-11674294	0
MAGED2	chrX:54850756-54859170	0
MAP4	chr3:47867189-48105768	0
MARK2	chr11:63363466-63433621	0
MATR3	chr5:138637690-138695259	0
MBP	chr18:72819770-72973788	0
MCFD2	chr2:46982516-47156780	0
MEAF6	chr1:37724501-37752962	0
MEGF11	chr15:63974687-64333139	0
MFF	chr2:227898198-227930793	0
MGST1	chr12:16391342-16408610	0
MIR3074	chr9:96528803-96889261	0
MKL2	chr16:14072696-14268130	0
MOBKL3	chr2:198088549-198125750	0
MOBP	chr3:39484073-39542105	0
MPST	chr22:35745621-35755808	0
MRAP	chr21:32585994-32687206	0
MRPL43	chr10:102722275-102737262	0
MTA3	chr2:42575212-42837591	0
MTCP1	chrX:153943090-154037972	0
MTCP1NB	chrX:153943090-154037972	0
MTERFD2	chr2:241586927-241690420	0
MTHFR	chr1:11749385-11909072	0
MTUS1	chr8:17478442-17702666	0
MYEF2	chr15:46200460-46257850	0
MYH10	chr17:8279903-8474804	0
MYL12B	chr18:3252134-3268282	0
NBEA	chr13:34414455-35144873	0
NCDN	chr1:35795660-35804963	0
NCOA4	chr10:51235232-51260740	0
NCOA6	chr20:32766238-32877094	0
NCSTN	chr1:158525000-158595366	0
NDEL1	chr17:8279903-8474804	0
NDRG2	chr14:20554762-20563775	0
NEB	chr2:152050095-152299247	0
NECAP2	chr1:16639805-16659159	0
NEK10	chr3:27127398-27385916	0
NEK3	chr13:51604779-51631997	0
NFASC	chr1:203064445-203258573	0
NFIB	chr9:14071846-14388630	0
NFYC	chr1:40929881-41009864	0
NIN	chr14:50256230-50367597	0
NKIRAS2	chr17:37372284-37459533	0
NME2	chr17:46585918-46604104	0
NPHP4	chr1:5845456-6083840	0
NPPA	chr1:11749385-11909072	0
NPRL3	chr16:67017-128859	0
NR1I3	chr1:159462456-159475822	0
NRG2	chr5:139207443-139403063	0
NRL	chr14:23619155-23664288	0
NSFL1C	chr20:1370806-1396417	0
NT5C2	chr10:104837763-104943041	0
NT5C3	chr7:32501662-33068934	0
NTNG2	chr9:134027154-134109742	0
NUDT6	chr4:123967312-124063573	0
NUP43	chr6:150087146-150109507	0
NUP62	chr19:55084727-55129003	0
OGG1	chr3:9765704-9786661	0
OLFM1	chr9:137106909-137152851	0
OPA1	chr3:194793706-194898294	0
OSBP2	chr22:29420062-29633811	0
OSBPL3	chr7:24802690-24986285	0
OSBPL6	chr2:178767453-178969119	0
OSBPL9	chr1:51800125-52026729	0
OTOF	chr2:26533574-26635070	0
PABPC1L	chr20:42972116-43022528	0
PALM2-AKAP2	chr9:111442892-111974613	0
PANK2	chr20:3817485-3852502	0
PARD3	chr10:34438494-35144255	0
PASK	chr2:241694187-241771112	0
PAX6	chr11:31766867-31796085	0
PBXIP1	chr1:153183175-153195221	0
PCDHA6	chr5:140154627-140372113	0
PCDHG@	chr5:140698537-140872730	0
PCID2	chr13:112879891-112911026	0
PCSK6	chr15:99661656-99847396	0
PDE10A	chr6:165660765-165996032	0
PDE11A	chr2:178196224-178681312	0
PDE1C	chr7:31757317-32305466	0
PDGFA	chr7:503420-526459	0
PDLIM5	chr4:95592060-95808400	0
PDLIM7	chr5:176843000-176857208	0
PDSS1	chr10:27026600-27189965	0
PEG3	chr19:61977741-62043887	0
PHACTR2	chr6:143971009-144194014	0
PHF10	chr6:169844181-169866026	0
PHTF1	chr1:114036376-114103621	0
PIAS3	chr1:144287344-144300792	0
PIGO	chr9:35078684-35086579	0
PIGP	chr21:37359533-37367340	0
PIK3CD	chr1:9634376-9807137	0
PKIB	chr6:122806194-123089217	0
PKMYT1	chr16:2959342-2970506	0
PLD3	chr19:45546424-45576230	0
PLEC	chr8:145061308-145121531	0
PLGLB1	chr2:86988586-87102486	0
PLSCR3	chr17:7225133-7238572	0
PLXNA4	chr7:131465777-131911863	0
PMEPA1	chr20:55656853-55719947	0
PNCK	chrX:152588378-152592974	0
PPARG	chr3:12304069-12450855	0
PPM1N	chr19:50680389-50697608	0
PPP1CB	chr2:28828117-28879300	0
PPP1R1B	chr17:35036704-35046404	0
PPP1R7	chr2:241694187-241771112	0
PPP2R2B	chr5:145949259-146415783	0
PPP2R2C	chr4:6373213-6525227	0
PPP3R1	chr2:68205962-68238150	0
PRICKLE4	chr6:41856477-41865614	0
PRIM2	chr6:57287561-57621334	0
PRKACB	chr1:84316328-84476765	0
PRKCQ	chr10:6509139-6662244	0
PRKD1	chr14:29115435-29466699	0
PRKG1	chr10:52421123-53728116	0
PRSS3	chr9:33740514-33789228	0
PSAP	chr10:73246060-73281132	0
PSMA1	chr11:14482998-14589108	0
PTGDS	chr9:138991776-138996014	0
PTK2	chr8:141737682-142080514	0
PTK2B	chr8:27224915-27372820	0
PTMA	chr2:232280637-232286495	0
PTPRT	chr20:40134805-41252024	0
PYCARD	chr16:31084765-31144011	0
PYGB	chr20:25176705-25319477	0
RAB43	chr3:130289101-130323683	0
RABGAP1L	chr1:172395170-173226353	0
RALGPS2	chr1:176960922-177153766	0
RASGEF1C	chr5:179460396-179568774	0
RASSF1	chr3:50342220-50353385	0
RBM39	chr20:33754945-33793648	0
RC3H2	chr9:124646655-124707383	0
RERE	chr1:8335052-8800286	0
RFX3	chr9:3214648-3515983	0
RGL4	chr22:22360328-22371363	0
RGPD1	chr2:86988586-87102486	0
RGS12	chr4:3285671-3411436	0
RGS7	chr1:239005437-239587153	0
RIC8B	chr12:105692528-105807215	0
RIMS2	chr8:104582290-105333263	0
RNF34	chr12:120322303-120346538	0
ROBO1	chr3:78729079-79721751	0
RPS8	chr1:45013827-45017038	0
RTN2	chr19:50680389-50697608	0
SCARA3	chr8:27547303-27590211	0
SDCBP2	chr20:1238618-1257838	0
SDK2	chr17:68842117-69015332	0
SEC13	chr3:10317614-10337855	0
SEC23B	chr20:18436187-18490059	0
SEMA4A	chr1:154386433-154414167	0
SEPW1	chr19:52973653-52979753	0
SERF2	chr15:41852106-41904243	0
SERINC4	chr15:41852106-41904243	0
SERPINA3	chr14:94148386-94160150	0
SETD4	chr21:36328708-36373557	0
SETDB1	chr1:149165511-149203837	0
SETDB2	chr13:48780789-48964298	0
SGIP1	chr1:66771653-66986570	0
SH2D3C	chr9:129540418-129580740	0
SHANK2	chr11:69991608-70536020	0
SIKE1	chr1:115113622-115124829	0
SLC25A23	chr19:6387092-6410781	0
SLC44A1	chr9:107046723-107241273	0
SLC44A5	chr1:75440403-75849389	0
SLC9A6	chrX:134895251-134957092	0
SLIT1	chr10:98747784-99042403	0
SMARCA2	chr9:2005341-2183624	0
SMARCB1	chr22:22459149-22511201	0
SMOC2	chr6:168584679-168815214	0
SMYD3	chr1:243979266-244737237	0
SNAPC3	chr9:15412731-15500989	0
SNCA	chr4:90865727-90978489	0
SNRPD3	chr22:23266409-23354972	0
SNX13	chr7:17798180-17946642	0
SNX25	chr4:186368277-186537146	0
SPATA13	chr13:23632860-23779204	0
SPTBN1	chr2:54536957-54752086	0
SPTBN4	chr19:45664965-45774204	0
SRC	chr20:35407970-35467867	0
SRRM2	chr16:2742330-2761412	0
SSBP3	chr1:54464782-54644680	0
SSR2	chr1:154245462-154257382	0
ST3GAL5	chr2:85919777-85969668	0
ST7L	chr1:112867665-113015764	0
STK16	chr2:219802722-219827574	0
SUMO1	chr2:202779154-202811567	0
SVEP1	chr9:112167351-112381981	0
SYCE1	chr10:135190856-135232866	0
SYNGR1	chr22:38075899-38111537	0
SYNJ1	chr21:32922943-33022183	0
SYNPO	chr5:149960834-150018985	0
TACC2	chr10:123738698-124004049	0
TAF5L	chr1:227795480-227828417	0
TAF8	chr6:42126228-42163170	0
TANK	chr2:161701711-161800978	0
TBC1D2	chr9:100001131-100057736	0
TCEA2	chr20:62158882-62181768	0
TCTN1	chr12:109536262-109605455	0
TET2	chr4:106286480-106419126	0
TIAM2	chr6:155453114-155677311	0
TJP1	chr15:27778862-27901998	0
TLE4	chr9:81376507-81531478	0
TNNT2	chr1:199594758-199613431	0
TNRC18	chr7:5312951-5431571	0
TOM1	chr22:34025860-34073973	0
TOM1L2	chr17:17687547-17816515	0
TOMM40L	chr1:159462456-159475822	0
TOMM6	chr6:41856477-41865614	0
TP53BP2	chr1:222034218-222100297	0
TPM3	chr1:152394403-152431233	0
TPT1	chr13:44809007-44813347	0
TRAF3IP1	chr2:238893820-238974202	0
TRAF3IP2	chr6:111986835-112034014	0
TRIM14	chr9:99858841-99921309	0
TRIM72	chr16:31084765-31144011	0
TSPAN4	chr11:832811-857116	0
TTC7A	chr2:46982516-47156780	0
TUBE1	chr6:112481970-112530685	0
TXNDC6	chr3:139388837-139530895	0
UBC	chr12:123962146-123965530	0
UBL3	chr13:29236545-29322715	0
UFD1L	chr22:17817700-17846726	0
UGGT2	chr13:95251838-95503638	0
UGP2	chr2:63921601-63972196	0
URB1	chr21:32585994-32687206	0
USP39	chr2:85696725-85729917	0
USP6NL	chr10:11542516-11694231	0
VIT	chr2:36777410-36895433	0
VLDLR	chr9:2611792-2644485	0
WASF1	chr6:110527714-110607900	0
WDR1	chr4:9685061-9727671	0
WIPI2	chr7:5196360-5240012	0
WISP3	chr6:112481970-112530685	0
WNK2	chr9:94987032-95148517	0
YME1L1	chr10:27439393-27483327	0
YWHAZ	chr8:101999979-102034745	0
YY1AP1	chr1:153895857-153925415	0
ZC3H13	chr13:45426600-45524895	0
ZDHHC16	chr10:99195919-99207114	0
ZFP91	chr11:58103162-58149782	0
ZFY	chrY:2863321-2910547	0
ZFYVE27	chr10:99486869-99510642	0
ZMIZ1	chr10:80498797-80746282	0
ZMYM2	chr13:19430809-19561253	0
ZMYND8	chr20:45271265-45418881	0
ZNF133	chr20:18217120-18245640	0
ZNF185	chrX:151833652-151892681	0
ZNF197	chr3:44630801-44664967	0
ZNF248	chr10:38131785-38186492	0
ZNF280D	chr15:54709670-54813576	0
ZNF385C	chr17:37372284-37459533	0
ZNF436	chr1:23558527-23576771	0
ZNF438	chr10:31173568-31360860	0
EPB41L3	chr18:5382387-5620640	1.11e-16
FLNA	chrX:153230090-153256188	1.11e-16
HSPH1	chr13:30608764-30634117	1.11e-16
USP21	chr1:159395877-159402137	1.11e-16
C22orf9	chr22:43966786-44015314	2.22e-16
WIPF1	chr2:175132548-175255873	2.22e-16
AMPD3	chr11:10428799-10485702	3.33e-16
CHMP1A	chr16:88238346-88251524	3.33e-16
S100A13	chr1:151857898-151885402	3.33e-16
SV2B	chr15:89444518-89645543	3.33e-16
LTBP1	chr2:33025542-33478080	4.44e-16
SLC5A6	chr2:27275962-27293550	5.55e-16
DPM1	chr20:48984810-49008499	6.66e-16
CD97	chr19:14353212-14380531	8.88e-16
PTER	chr10:16518969-16595742	8.88e-16
L3MBTL4	chr18:5944704-6404910	1.33e-15
VAMP1	chr12:6431519-6450326	1.33e-15
PCDHA4	chr5:140154627-140372113	1.44e-15
MAT2A	chr2:85619798-85625912	1.78e-15
TPRN	chr9:139205889-139215578	1.78e-15
ZNF574	chr19:47264703-47277557	2.33e-15
RORA	chr15:58576754-59308709	3.33e-15
HMGB1	chr13:29930876-30089734	3.55e-15
LCLAT1	chr2:30523612-30720594	3.66e-15
RPL13A	chr19:54681843-54687370	3.77e-15
GOLGA7	chr8:41467237-41487650	4.22e-15
NDRG4	chr16:57055117-57105024	5.22e-15
MAP2	chr2:209997015-210307087	6.99e-15
TSC22D1	chr13:43905660-44048701	8.33e-15
FAM135A	chr6:71179827-71327596	1.01e-14
MAD1L1	chr7:1821955-2239404	1.32e-14
PEMT	chr17:17349601-17435719	1.32e-14
SHANK1	chr19:55817047-55914519	1.37e-14
EEF1A2	chr20:61589809-61601081	1.41e-14
CCHCR1	chr6:31218194-31233969	1.69e-14
ZFPM2	chr8:106400322-106885939	2.41e-14
BCL2L13	chr22:16491620-16591991	6.07e-14
GUCY1A3	chr4:156807327-156872926	6.71e-14
FBLN5	chr14:91405510-91490499	7.78e-14
ARHGEF6	chrX:135575371-135691169	8.44e-14
PGS1	chr17:73886329-74085071	1.06e-13
C6orf142	chr6:53991672-54239040	1.06e-13
ENSG00000184154	chr11:71469552-71497332	1.14e-13
TRPM6	chr9:76527230-76692830	1.41e-13
C10orf137	chr10:127398073-127442702	1.52e-13
UBA1	chrX:46935203-46959470	2.21e-13
NRXN2	chr11:64130221-64247236	2.59e-13
CASK	chrX:41263407-41667660	2.98e-13
NPDC1	chr9:139053745-139060476	3.39e-13
IER2	chr19:13122281-13126716	4.16e-13
ADCY2	chr5:7449342-7883194	6.64e-13
SLC22A17	chr14:22885351-22891961	7.36e-13
2008-09-01	chr5:132111035-132140966	7.37e-13
ENSG00000206503	chr6:30017015-30021640	1.5e-12
NUP98	chr11:3652816-3775468	1.52e-12
RBMS1	chr2:160838760-161058551	1.54e-12
ATG4B	chr2:242172492-242261945	1.71e-12
RAB3IP	chr12:68418897-68503251	1.74e-12
2005-09-01	chr22:18081986-18092297	1.82e-12
ERG	chr21:38673818-38955488	2.11e-12
CATSPERG	chr19:43518254-43553423	2.23e-12
SENP6	chr6:76368319-76484717	2.24e-12
FRMD4A	chr10:13725711-14412889	2.66e-12
PUM1	chr1:31176939-31311350	2.7e-12
NEFH	chr22:28206218-28217275	2.81e-12
PHYHIPL	chr10:60606352-60792358	3e-12
C19orf55	chr19:40939937-41034579	3.05e-12
ERMN	chr2:157883371-157892392	4.14e-12
ANK2	chr4:114190280-114529333	4.31e-12
PRKAR1A	chr17:64019704-64040503	4.53e-12
MACROD2	chr20:13924364-15981842	4.61e-12
PCYT1B	chrX:24486124-24600715	4.7e-12
ID2	chr2:8736425-8742034	5.78e-12
ME3	chr11:85829797-86061075	7.27e-12
CCDC88C	chr14:90807421-90953886	8.06e-12
TAX1BP1	chr7:27746238-27835911	1.07e-11
GRINL1A	chr15:55671405-55815085	1.19e-11
PPP3CB	chr10:74866569-74925765	1.24e-11
SMTN	chr22:29807304-29830609	1.49e-11
C10orf46	chr10:120430483-120504748	1.49e-11
GIPC1	chr19:14449571-14467944	1.53e-11
DIAPH1	chr5:140874766-140978806	1.74e-11
GPR98	chr5:89890372-90495789	1.79e-11
TTC18	chr10:74683525-74789458	1.81e-11
ENSG00000162701	chr1:195745396-196011078	1.84e-11
ITGA6	chr2:173000391-173079427	1.94e-11
TCEAL2	chrX:101267315-101269339	1.95e-11
NRXN1	chr2:50000991-51113178	2.35e-11
IFITM3	chr11:309677-310848	2.37e-11
RNF130	chr5:179315110-179431719	2.38e-11
ENSG00000196435	chr9:139234527-139235854	2.57e-11
RTEL1	chr20:61759606-61800495	2.59e-11
XPO4	chr13:20249468-20374949	2.79e-11
AFTPH	chr2:64604968-64673635	2.91e-11
SLC29A1	chr6:44295219-44309866	3.05e-11
RGPD2	chr2:87828720-87906586	3.08e-11
C2orf82	chr2:233441967-233449360	3.14e-11
RCAN1	chr21:34810651-34909303	3.7e-11
MORF4	chr15:76952226-76977127	5.24e-11
CERCAM	chr9:130213865-130239447	6.7e-11
ENSG00000073009	chrX:153412799-153448998	7.12e-11
RANGAP1	chr22:39971560-40086053	8.73e-11
NFKBIB	chr19:44082443-44091373	9.21e-11
SMG7	chr1:181708256-181789948	9.69e-11
KIF1B	chr1:10193417-10364248	9.95e-11
AIFM3	chr22:19649433-19665649	1.04e-10
CLTA	chr9:36180891-36202055	1.07e-10
COL12A1	chr6:75850761-75972343	1.43e-10
PIN1	chr19:9806998-9821358	1.47e-10
FAM107B	chr10:14600561-14856902	1.68e-10
ENSG00000130731	chr16:624429-626348	1.68e-10
GPSM3	chr6:32266520-32299822	1.7e-10
FAM122B	chrX:133731261-133758830	1.74e-10
LNPEP	chr5:96296853-96390871	1.75e-10
XPO1	chr2:61558487-61618922	1.8e-10
PTGES2	chr9:129922793-129930533	1.92e-10
NR4A1	chr12:50718760-50739558	2.57e-10
LAMP1	chr13:112999469-113025746	2.87e-10
RBPJ	chr4:25930429-26045851	3.54e-10
FBXW7	chr4:153461859-153675622	3.7e-10
CITED2	chr6:139735088-139737478	3.87e-10
ECE2	chr3:185450138-185493513	4.03e-10
SPRY2	chr13:79808111-79813087	4.98e-10
PFKM	chr12:46787423-46826154	5.19e-10
SHISA5	chr3:48463140-48516665	5.36e-10
TTC3	chr21:37367440-37497283	5.39e-10
CHTF8	chr16:67697660-67723985	6.64e-10
C1orf52	chr1:85488226-85497943	6.71e-10
PPDPF	chr20:61622561-61623967	7.31e-10
HMGA1	chr6:34312627-34321986	7.5e-10
CMPK1	chr1:47572067-47617097	8.36e-10
OCIAD1	chr4:48527771-48558588	8.37e-10
NTNG1	chr1:107484151-107827603	9.05e-10
HNRNPH2	chrX:100532632-100555762	9.31e-10
NRCAM	chr7:107575317-107884062	1.08e-09
SPAG9	chr17:46397082-46553204	1.34e-09
CACYBP	chr1:173235193-173247786	1.37e-09
PEA15	chr1:158441748-158451790	1.4e-09
DISC1	chr1:229829183-230243637	1.49e-09
SEC16A	chr9:138454369-138491962	1.55e-09
POM121	chr7:71987871-72063222	1.58e-09
MRPL28	chr16:356927-360569	1.62e-09
SLC6A8	chrX:152606585-152615234	1.65e-09
C20orf30	chr20:5028485-5041733	1.74e-09
PORCN	chrX:48252306-48264359	1.85e-09
TMSB4X	chrX:12903149-12905267	1.87e-09
ALDOC	chr17:23924259-23928079	1.91e-09
C1QTNF3	chr5:34023068-34160396	2.07e-09
C9orf86	chr9:138822194-138855460	2.57e-09
HIF3A	chr19:51492142-51538530	2.72e-09
PAPOLA	chr14:96038514-96103178	3.03e-09
ASGR1	chr17:7017473-7023419	3.4e-09
SYTL2	chr11:85082914-85146692	3.57e-09
UBAP2L	chr1:152445806-152510019	3.59e-09
ATF3	chr1:210805319-210860740	4.11e-09
PPHLN1	chr12:41006213-41128689	4.26e-09
SYNJ2	chr6:158322906-158439556	4.4e-09
ENSG00000198868	chrM:10470-12138	4.77e-09
CDKAL1	chr6:20642666-21340614	4.89e-09
PCBP2	chr12:52132160-52159872	4.96e-09
ENSG00000204619	chr6:30142464-30151607	5.42e-09
PIK3R3	chr1:46278398-46371053	5.64e-09
CYCS	chr7:25124801-25131480	5.85e-09
PPP2CB	chr8:30762678-30789894	5.86e-09
NEDD8	chr14:23755896-23771412	5.89e-09
FBXL16	chr16:682500-695830	6.66e-09
PKM2	chr15:70278423-70310738	6.85e-09
PJA2	chr5:108698308-108773594	7.3e-09
RAB28	chr4:12978446-13095060	7.42e-09
C1QTNF1	chr17:74526885-74557465	7.77e-09
APTX	chr9:32962608-32991626	7.93e-09
C1orf77	chr1:151857898-151885402	7.97e-09
CAPN10	chr2:241174805-241219348	8.82e-09
PDGFB	chr22:37949664-37970936	9.33e-09
CACNA1B	chr9:139882197-140138897	9.57e-09
MECP2	chrX:152940217-153016406	1.02e-08
TMEM2	chr9:73371331-73573228	1.09e-08
RPL8	chr8:145985958-145988609	1.19e-08
RAB2A	chr8:61592112-61696183	1.27e-08
BCL2L1	chr20:29715915-29774324	1.27e-08
C10orf58	chr10:82157564-82182733	1.28e-08
KIF26B	chr1:243385349-243933051	1.33e-08
IL6ST	chr5:55266679-55431094	1.5e-08
PIGC	chr1:170077260-170704590	1.53e-08
PCP4	chr21:40161216-40223190	1.55e-08
C19orf66	chr19:10053361-10074472	1.56e-08
LONRF3	chrX:117992608-118040916	1.73e-08
TRIO	chr5:14196828-14563310	2.16e-08
SOD1	chr21:31953805-31963115	2.23e-08
UGT8	chr4:115739413-115817463	2.36e-08
MPDZ	chr9:13095702-13269563	2.71e-08
NDFIP2	chr13:78953287-79028211	2.89e-08
NCOA7	chr6:126143999-126293949	2.95e-08
COMMD6	chr13:74997355-75010939	3.02e-08
DST	chr6:56430743-56927363	3.15e-08
TSTD1	chr1:159232608-159275391	3.22e-08
THOC5	chr22:28234156-28279736	3.23e-08
TSPAN14	chr10:82204000-82270584	3.48e-08
UBE2D3	chr4:103936216-104009473	3.55e-08
TPM4	chr19:15938465-16130344	3.71e-08
ZNF594	chr17:5023553-5035902	3.83e-08
FGF13	chrX:137541400-137894912	3.85e-08
ENSG00000018625	chr1:158349929-158379996	4.49e-08
BDNF	chr11:27633015-27700181	4.52e-08
STMN1	chr1:26099195-26105955	4.52e-08
NLGN4X	chrX:5818084-6156706	4.55e-08
EPB41L2	chr6:131202179-131426017	5.05e-08
2002-09-01	chr2:241815351-241942115	5.6e-08
C4orf3	chr4:120439094-120445048	5.71e-08
WASH3P	chr15:100319117-100334282	5.98e-08
AHSA2	chr2:61258056-61551353	6.37e-08
WDR26	chr1:222639727-222688624	6.44e-08
DFNB31	chr9:116204180-116307557	6.8e-08
HLA-C	chr6:31344504-31432935	7.9e-08
HP1BP3	chr1:20941757-20985768	8.28e-08
CUL3	chr2:225043112-225158358	8.38e-08
TMUB1	chr7:150409105-150411503	9.05e-08
OPN3	chr1:239762056-239870324	9.86e-08
FAM167A	chr8:11234596-11361663	1.06e-07
SSFA2	chr2:182464926-182503710	1.13e-07
ANP32E	chr1:148457478-148475084	1.16e-07
SLC9A1	chr1:27297892-27366059	1.17e-07
GPR35	chr2:241174805-241219348	1.32e-07
KIAA0408	chr6:127803180-127879540	1.36e-07
BUB3	chr10:124903859-124914869	1.5e-07
RPL15	chr3:23933642-23937334	1.5e-07
MYT1L	chr2:1771893-2314052	1.53e-07
ENSG00000115415	chr2:191542120-191587181	1.86e-07
C9orf78	chr9:131629385-131637393	1.96e-07
C19orf2	chr19:35106390-35198451	1.99e-07
MIDN	chr19:1199551-1210139	2.03e-07
CCNB1IP1	chr14:19849368-19871297	2.05e-07
ENSG00000169910	chr7:65178206-65195756	2.1e-07
GPR34	chrX:41263407-41667660	2.15e-07
LDB3	chr10:88418349-88485802	2.15e-07
RPL27	chr17:38403971-38408482	2.23e-07
AHRR	chr5:324735-491392	2.3e-07
DYNC1I2	chr2:172252224-172313176	2.76e-07
SYS1	chr20:43468084-43472664	2.85e-07
GHITM	chr10:85889164-85903291	3.73e-07
HDDC2	chr6:125638194-125664981	3.83e-07
KIAA0368	chr9:113162792-113286846	3.83e-07
NELF	chr9:139461842-139473592	4.02e-07
MZT2A	chr2:131958002-131966775	4.1e-07
POU6F2	chr7:38984122-39470915	4.27e-07
STRADA	chr17:58954426-59172947	4.34e-07
RAB18	chr10:27833254-27869103	4.35e-07
RPL26	chr17:8221558-8227290	4.5e-07
POLR3H	chr22:40195074-40270556	4.55e-07
DGKB	chr7:14151198-14909359	4.68e-07
HDAC8	chrX:71466090-71709623	4.84e-07
PDLIM2	chr8:22492587-22511483	5.2e-07
P4HA2	chr5:131555429-131591455	5.27e-07
ACSL5	chr10:114123905-114178127	5.4e-07
OXR1	chr8:107739269-107834093	5.61e-07
ENOX2	chrX:129585030-129864889	5.73e-07
MRPL23	chr11:1918435-1962328	5.8e-07
SLC12A6	chr15:32304531-32417557	5.87e-07
C2orf86	chr2:63202040-63669355	5.99e-07
EXOC7	chr17:71586903-71611451	6.25e-07
SLMAP	chr3:57716996-57889935	6.77e-07
TBCD	chr17:78303228-78602975	6.91e-07
KLC2	chr11:65777734-65801539	7.09e-07
CADM2	chr3:85091448-86200638	7.1e-07
HDAC9	chr7:18501893-19003518	7.11e-07
RBBP7	chrX:16714525-16798405	7.48e-07
MAP1LC3A	chr20:32598352-32611810	7.55e-07
ASS1	chr9:132309914-132366482	7.61e-07
PREPL	chr2:44356106-44442449	7.9e-07
ZNF615	chr19:57186399-57203275	7.98e-07
MICALL1	chr22:36632291-36667971	8.08e-07
F11R	chr1:159232608-159275391	8.2e-07
POGK	chr1:165075347-165090334	8.28e-07
NDUFS7	chr19:1334905-1346583	8.29e-07
SLAIN1	chr13:77170049-77236378	8.7e-07
SIGIRR	chr11:395715-407397	8.91e-07
NHP2L1	chr22:40399885-40416454	9.1e-07
TRIM46	chr1:153412969-153424069	9.31e-07
CPNE1	chr20:33677379-33716262	9.37e-07
MLLT10	chr10:21863107-22072560	9.54e-07
FAM184A	chr6:119322696-119512057	9.56e-07
FAM69C	chr18:70253943-70276159	9.58e-07
SULT1A2	chr16:28510766-28542375	9.92e-07
DYNC2H1	chr11:102485369-102855801	1.02e-06
BMPR2	chr2:202949915-203140719	1.03e-06
GSTM5	chr1:110056387-110062411	1.04e-06
ACP1	chr2:254895-268278	1.06e-06
MXI1	chr10:111957352-112037113	1.09e-06
WNK1	chr12:732485-890879	1.1e-06
CRMP1	chr4:5763824-5945686	1.13e-06
SYT15	chr10:46372767-46390818	1.13e-06
FAU	chr11:64644678-64658579	1.2e-06
ESYT2	chr7:158216449-158315080	1.4e-06
PTPN5	chr11:18706052-18770844	1.42e-06
NACA	chr12:55380831-55405350	1.42e-06
PMF1	chr1:154449407-154479736	1.49e-06
2007-03-01	chr2:160277245-160333329	1.54e-06
CELF3	chr1:149941453-149968694	1.56e-06
GBA2	chr9:35687335-35739225	1.62e-06
C18orf10	chr18:32630032-33059285	1.68e-06
HP	chr16:70646008-70668646	1.72e-06
MCF2L	chr13:112596692-112802054	1.74e-06
PNMA3	chrX:151975529-151979475	1.77e-06
ATP5G3	chr2:175749236-175754736	1.85e-06
FAM54B	chr1:26019027-26032016	1.86e-06
ATP1B1	chr1:167341558-167603810	1.86e-06
NEDD4L	chr18:53862777-54216369	1.93e-06
WTAP	chr6:160068141-160097339	1.96e-06
SCOC	chr4:141397889-141523158	2.08e-06
PION	chr7:76778006-76883653	2.11e-06
SEPHS1	chr10:13399429-13430286	2.11e-06
PSD3	chr8:18429092-18915476	2.12e-06
LMO3	chr12:16592573-16652291	2.15e-06
RAB6A	chr11:73064341-73149849	2.18e-06
SNRPN	chr15:22619886-22776293	2.18e-06
IL4I1	chr19:55084727-55129003	2.22e-06
ZNF286A	chr17:15543779-15588820	2.25e-06
AVL9	chr7:32501662-33068934	2.29e-06
PLEKHG1	chr6:150962691-151206492	2.34e-06
NUCKS1	chr1:203953731-203985920	2.34e-06
CASP3	chr4:185785843-185807623	2.41e-06
TRIM16L	chr17:15471998-15528338	2.43e-06
CLN3	chr16:28396100-28411124	2.47e-06
RNF146	chr6:127629447-127651405	2.51e-06
ANXA4	chr2:69822609-69907095	2.52e-06
ENSG00000130826	chrX:153637339-153659159	2.54e-06
G6PD	chrX:153412799-153448998	2.63e-06
SASH1	chr6:148635132-148914877	2.64e-06
RNF167	chr17:4781348-4789260	2.72e-06
NCOR2	chr12:123374913-123586102	2.72e-06
AHCYL1	chr1:110328830-110374500	2.74e-06
ING1	chr13:110163321-110171421	2.76e-06
ISCU	chr12:107480511-107487272	2.79e-06
OLFML2B	chr1:160219605-160260268	2.88e-06
SPAG1	chr8:101239438-101323306	3.12e-06
KCNIP2	chr10:103575721-103593667	3.21e-06
NF2	chr22:28329562-28424583	3.55e-06
CNIH	chr14:53933475-53977898	3.56e-06
CBFA2T2	chr20:31541583-31701503	3.56e-06
LEMD1	chr1:203617128-203685682	3.56e-06
MATK	chr19:3728967-3752810	3.58e-06
HIBCH	chr2:190776891-190944555	3.71e-06
WRB	chr21:39674108-39691685	4.07e-06
CCDC36	chr3:49042147-49270159	4.1e-06
MED20	chr6:41981069-41996855	4.18e-06
PPM1G	chr2:27457565-27486000	4.32e-06
C22orf40	chr22:45018571-45024857	4.54e-06
DPF3	chr14:72145494-72430562	4.6e-06
PDE1A	chr2:182715427-183095710	4.76e-06
C3orf33	chr3:156963094-157006755	4.89e-06
RALY	chr20:32045145-32131697	5.15e-06
2004-09-01	chr17:53952614-53964410	5.15e-06
PRKAG2	chr7:150884135-151205249	5.32e-06
CCDC78	chr16:710581-716460	5.38e-06
A2LD1	chr13:99539337-100039047	5.4e-06
ISLR2	chr15:72208767-72216194	5.5e-06
CAST	chr5:96023532-96169648	5.64e-06
RAPGEF3	chr12:46417295-46439128	6.01e-06
SERPINB6	chr6:2893391-2917089	6.14e-06
SF3B1	chr2:197964944-198008048	6.22e-06
FAM113A	chr20:2763959-2967320	6.33e-06
MRFAP1L1	chr4:6760337-6762505	6.41e-06
STYXL1	chr7:75463591-75515257	6.43e-06
DCLK1	chr13:35243477-35603443	6.43e-06
IQSEC2	chrX:53278783-53367247	6.48e-06
CFB	chr6:32003472-32027840	6.51e-06
NCAM1	chr11:112337301-112654343	6.59e-06
TP53INP2	chr20:32755803-32764904	6.65e-06
PKDCC	chr2:42128663-42139172	6.87e-06
ZMYM3	chrX:70376198-70391721	6.92e-06
ENSG00000088899	chr20:3091262-3102192	6.97e-06
SNRNP70	chr19:54280276-54303681	7.13e-06
FKBP1C	chr6:63979309-63980888	7.19e-06
GLTSCR2	chr19:52940619-52957851	7.34e-06
RBM33	chr7:155129905-155266940	7.53e-06
VWA3A	chr16:22011362-22075775	7.72e-06
SMC1A	chrX:53417794-53466361	7.83e-06
SUCLG1	chr2:84504164-84540097	8.02e-06
C9orf68	chr9:4578826-4656428	8.04e-06
MRFAP1	chr4:6692718-6695357	8.12e-06
RAD17	chr5:68683310-68746384	8.24e-06
WHSC1	chr4:1842920-1953732	8.49e-06
PRPF40B	chr12:48303669-48387464	8.72e-06
CAMTA1	chr1:6767970-7752350	8.79e-06
LTN1	chr21:29222336-29287141	8.88e-06
HNRNPA1	chr12:52960754-52965295	9.04e-06
GPM6A	chr4:176791082-177160642	9.27e-06
ANXA7	chr10:74805229-74843817	9.43e-06
RPS14	chr5:149802945-149809512	9.48e-06
KLF10	chr8:103730188-103737127	9.5e-06
FUT8	chr14:64947062-65279714	9.62e-06
PSIP1	chr9:15412731-15500989	9.72e-06
USP19	chr3:49042147-49270159	9.95e-06
ANKRD44	chr2:197566546-197883756	1.02e-05
PLEKHA1	chr10:124124209-124181857	1.04e-05
PLEKHB1	chr11:73023591-73051510	1.04e-05
GRINA	chr8:145136213-145139571	1.06e-05
PTP4A1	chr6:64339878-64351447	1.12e-05
HNRNPA2B1	chr7:26196080-26206942	1.16e-05
MDM1	chr12:66974612-67012379	1.16e-05
DNAH2	chr17:7562745-7677783	1.18e-05
TNS1	chr2:218372756-218517041	1.2e-05
REV3L	chr6:111726926-111911125	1.21e-05
KIAA1797	chr9:20648307-20985954	1.29e-05
ZNF12	chr7:6694588-6713091	1.35e-05
GSTA4	chr6:52950709-52968099	1.35e-05
TMEM128	chr4:4288169-4300870	1.37e-05
C17orf97	chr17:260433-273762	1.42e-05
RGS4	chr1:161305558-161313216	1.46e-05
TBRG1	chr11:123997980-124009440	1.46e-05
DLG2	chr11:82843700-85015962	1.51e-05
NR4A2	chr2:156889193-156907106	1.54e-05
PCDH9	chr13:65774969-66702578	1.54e-05
PRNP	chr20:4614796-4630233	1.54e-05
SUPT7L	chr2:27702009-27771347	1.59e-05
PCNA	chr20:5043598-5055268	1.67e-05
BPTF	chr17:63252241-63410956	1.7e-05
ARHGEF4	chr2:131311497-131521306	1.76e-05
GPR123	chr10:134734422-134795169	1.78e-05
MRPL19	chr2:75727416-75791830	1.79e-05
FGFR3	chr4:1764831-1780396	1.81e-05
ARAF	chrX:47305521-47364200	1.82e-05
ADI1	chr2:3480697-3502306	1.83e-05
ZNF638	chr2:71357230-71515699	1.84e-05
UXS1	chr2:106076190-106177227	1.84e-05
SH3GLB2	chr9:130810133-130830400	1.86e-05
ZNF691	chr1:43084866-43090735	1.88e-05
AGPAT4	chr6:161332748-161615097	1.92e-05
PYCR1	chr17:77483559-77488463	1.93e-05
BLOC1S2	chr10:102023702-102036436	1.95e-05
CHI3L1	chr1:201414681-201422545	2.02e-05
TMEFF2	chr2:192522013-192767904	2.04e-05
ENSG00000078687	chr17:73556588-73613729	2.08e-05
CCNY	chr10:35575958-35900858	2.1e-05
KLHL12	chr1:201126852-201164387	2.14e-05
VSNL1	chr2:17583873-17701766	2.22e-05
SLC25A25	chr9:129870299-129911345	2.26e-05
IFRD1	chr7:111850461-111903480	2.27e-05
PARK7	chr1:7944347-7967928	2.31e-05
GABRB3	chr15:24339785-24777095	2.32e-05
HOMER1	chr5:78704214-78845796	2.33e-05
RUSC1	chr1:153557310-153567529	2.33e-05
PRPS1	chrX:106758402-106780909	2.4e-05
CDCA7L	chr7:21549357-21952227	2.44e-05
EFHD1	chr2:233179010-233255728	2.58e-05
SRSF7	chr2:38824246-38832005	2.64e-05
BZW1	chr2:201384513-201396814	2.67e-05
LSM14A	chr19:39355282-39412048	2.69e-05
CLIC2	chrX:154158719-154217180	2.71e-05
ASTN2	chr9:118227327-119217138	2.73e-05
WDR13	chrX:48332466-48348518	2.73e-05
CHD3	chr17:7728848-7756803	2.74e-05
AGL	chr1:100088227-100162167	2.8e-05
RAMP1	chr2:238432274-238485492	2.85e-05
TOMM34	chr20:42972116-43022528	2.89e-05
RNF14	chr5:141326620-141348934	2.95e-05
MEIS2	chr15:34970518-35189740	3.01e-05
TMEM59	chr1:54269934-54291765	3.21e-05
CA10	chr17:47062673-47592160	3.31e-05
ATP2B2	chr3:10340706-10724716	3.44e-05
KCNK1	chr1:231816372-231874607	3.58e-05
RFWD2	chr1:174180589-174442993	3.66e-05
NEU4	chr2:242398592-242407412	3.67e-05
ARHGAP9	chr12:56140200-56200567	3.71e-05
C22orf23	chr22:36669473-36679622	3.76e-05
OPRL1	chr20:62181931-62215047	3.86e-05
ENSG00000068831	chr11:64250958-64269504	3.88e-05
PDE4A	chr19:10388448-10441306	3.99e-05
PHF14	chr7:10980023-11175767	4e-05
SLC26A10	chr12:56290229-56313252	4e-05
C6orf106	chr6:34663049-34772603	4.08e-05
BTF3	chr5:72830005-72837202	4.09e-05
RC3H1	chr1:172166974-172228833	4.14e-05
C1D	chr2:68122843-68143661	4.18e-05
FTO	chr16:52295375-52705882	4.19e-05
ZNF23	chr16:70039000-70053651	4.29e-05
HNRNPL	chr19:44018868-44034819	4.51e-05
SNX15	chr11:64538228-64564618	4.55e-05
ENSG00000204387	chr6:31910382-31915520	4.56e-05
HNRPLL	chr2:38642623-38683675	4.59e-05
KLHL32	chr6:97479216-97695351	4.6e-05
ATPIF1	chr1:28435197-28437196	4.66e-05
ZCCHC6	chr9:88092467-88159189	4.69e-05
AKTIP	chr16:52025861-52094671	4.72e-05
ASB1	chr2:239000364-239025630	4.73e-05
DKK3	chr11:11941122-11987493	4.76e-05
GALNT9	chr12:131246872-131415862	4.87e-05
ERGIC3	chr20:33593191-33608818	4.91e-05
EEF1A1	chr6:74282193-74288344	4.92e-05
ARPC5L	chr9:126664229-126679824	4.96e-05
SULT1A1	chr16:28510766-28542375	4.96e-05
FAM168B	chr2:131521918-131567474	4.98e-05
MT1E	chr16:55217085-55218523	5e-05
STAMBP	chr2:73909593-73954268	5.11e-05
ENSG00000198064	chr16:22432583-22455333	5.13e-05
ASPDH	chr19:55706672-55709759	5.14e-05
MZT2B	chr2:130625449-130664769	5.18e-05
FAM49B	chr8:130922899-131097879	5.4e-05
GNB1L	chr22:18124225-18222462	5.64e-05
ANKS1B	chr12:97653468-98902563	5.71e-05
CA5B	chrX:15666312-15715669	5.92e-05
FKBP3	chr14:44654855-44674272	5.96e-05
ZFAND2B	chr2:219779749-219782613	5.99e-05
OSBP	chr11:59098446-59140193	6.09e-05
FBXO44	chr1:11631032-11645971	6.16e-05
MDH1	chr2:63669595-63687832	6.34e-05
STRBP	chr9:124927138-125070718	6.39e-05
NR2C2	chr3:14964094-15081820	6.41e-05
ZFAND5	chr9:74156160-74169983	6.6e-05
CYTH1	chr17:74181724-74289974	6.69e-05
BSG	chr19:522324-534492	6.7e-05
GGA1	chr22:36334448-36359516	6.84e-05
AIF1L	chr9:132961732-133098909	6.85e-05
FGFR1OP2	chr12:26982582-27058405	7.2e-05
DENND4C	chr9:19280748-19364139	7.27e-05
SRP9	chr1:224032153-224044788	7.57e-05
ENSG00000168384	chr6:33140323-33173050	7.61e-05
CHMP2A	chr19:63754745-63758298	7.65e-05
ENSG00000117385	chr1:42984632-43005313	7.71e-05
C5orf33	chr5:36228450-36278015	7.88e-05
RPS6KA3	chrX:20077950-20194671	7.97e-05
ENSG00000204580	chr6:30956783-30975912	7.98e-05
CCT7	chr2:73314873-73333655	8.03e-05
PGRMC2	chr4:129409846-129429434	8.08e-05
ESRRG	chr1:214743210-215377720	8.27e-05
GRB2	chr17:70825751-70913385	8.31e-05
ANGPTL1	chr1:176960922-177153766	8.7e-05
CDK19	chr6:111037873-111243533	8.75e-05
APBB2	chr4:40510995-40911245	8.8e-05
METAP2	chr12:94391952-94433746	8.82e-05
C1orf151	chr1:19796053-19839759	8.96e-05
TMEM151B	chr6:44346457-44454672	9.03e-05
C1orf86	chr1:1971768-2122397	9.21e-05
ZBTB40	chr1:22650930-22730237	9.24e-05
MAPK8IP1	chr11:45863777-45884592	9.29e-05
FAM177A1	chr14:34583863-34622340	9.36e-05
TST	chr22:35736845-35745454	9.38e-05
GRIA4	chr11:104986009-105358029	9.4e-05
SCAMP1	chr5:77692162-77812318	9.46e-05
NR2E1	chr6:108593954-108616704	9.48e-05
HSPA12B	chr20:3661355-3681758	9.54e-05
VAMP4	chr1:169935922-169977837	9.72e-05
FAM101A	chr12:123339662-123366521	9.78e-05
RAB2B	chr14:20997018-21049297	9.78e-05
PTPRA	chr20:2763959-2967320	9.82e-05
SH3YL1	chr2:208148-254810	9.84e-05
CAMK2B	chr7:44223279-44331749	0.0001
CNOT4	chr7:134697089-134845391	0.000102
ALDOA	chr16:29971944-29989242	0.000104
ZNF428	chr19:48803216-48815846	0.000104
RAPGEF5	chr7:22124433-22363288	0.000105
CDKN2C	chr1:51199004-51212893	0.000106
MRPL12	chr17:77280811-77284951	0.000107
HDLBP	chr2:241815351-241942115	0.000108
TSC22D3	chrX:106843106-106905827	0.000109
CAMK2A	chr5:149579246-149650047	0.000111
GAD2	chr10:26545241-26633493	0.000114
ATXN10	chr22:44446350-44619493	0.000115
CHM	chrX:85002840-85189222	0.000115
FILIP1	chr6:76062345-76260216	0.000116
IARS	chr9:94012445-94095819	0.000116
C7orf41	chr7:30141076-30168906	0.000117
STARD13	chr13:32575306-32757892	0.000119
CNDP2	chr18:70314576-70339336	0.00012
SHMT1	chr17:18159318-18207581	0.00012
PLCB4	chr20:8997332-9409889	0.000121
DACT1	chr14:58170554-58184792	0.000122
AGFG1	chr2:228045111-228130548	0.000122
VDAC1	chr5:133335504-133368723	0.000123
PMP22	chr17:15073821-15109369	0.000125
MID1	chrX:10373595-10761694	0.000126
ENKUR	chr10:25310922-25345091	0.000129
MRPL52	chr14:22368935-22374079	0.00013
MRPL42	chr12:92385400-92420568	0.00013
LSMD1	chr17:7700729-7701897	0.000133
TMEM14C	chr6:10831323-10839338	0.000133
DYNLRB1	chr20:32567864-32592422	0.000135
HDGF	chr1:154978525-154988864	0.000136
GLOD4	chr17:609441-642488	0.000136
IP6K2	chr3:48700423-48729710	0.000136
NINJ2	chr12:543723-643016	0.000138
KRI1	chr19:10525266-10537696	0.000138
CTBP2	chr10:126666407-126839093	0.000138
HNRNPR	chr1:23508862-23543440	0.000139
COPS8	chr2:237658822-237672226	0.000139
TRPM3	chr9:72339768-73251640	0.00014
CAPG	chr2:85475381-85499066	0.000141
MAGI3	chr1:113734997-114030068	0.000142
NAA15	chr4:140430520-140531972	0.000142
ESR1	chr6:152053323-152466099	0.000142
CREBZF	chr11:85049532-85053794	0.000144
IFT140	chr16:1483364-1667910	0.000144
PTTG1IP	chr21:45093927-45118169	0.000147
BMP1	chr8:22078644-22125782	0.000148
E2F6	chr2:11501951-11523748	0.00015
URGCP	chr7:43882029-43932521	0.000154
C9orf30	chr9:102229379-102379733	0.000155
GALNTL6	chr4:172971228-174199266	0.000157
BAGE2	chr21:10042712-10120608	0.000159
RPL31	chr2:100985122-101134278	0.000159
MBNL2	chr13:96671688-96844375	0.000161
RASA1	chr5:86599837-86723488	0.000167
GABRA5	chr15:24339785-24777095	0.00017
MGAT4A	chr2:98602000-98714021	0.000171
CCNG1	chr5:162797154-162804598	0.000172
SEC61A2	chr10:12211641-12332593	0.000173
ZNF833P	chr19:11611590-11658382	0.000174
HVCN1	chr12:109536262-109605455	0.000175
HHLA3	chr1:70593080-70606291	0.000176
SRSF2IP	chr12:44599180-44670668	0.000178
PTPRG	chr3:61522282-62255613	0.000181
TBCB	chr19:41293848-41308689	0.000184
ADORA1	chr1:201326404-201403156	0.000186
CNOT3	chr19:59333260-59355258	0.000187
CTNNA3	chr10:67349874-69125933	0.000187
RUFY3	chr4:71806559-71891789	0.00019
ATF7IP2	chr16:10387412-10484996	0.000193
FLCN	chr17:17056253-17081227	0.000193
TJP3	chr19:3441823-3723219	0.000193
PTPN11	chr12:111340918-111432099	0.000196
HCRTR1	chr1:31855887-31883064	0.0002
VTA1	chr6:142510086-142583776	0.000201
HNRNPK	chr9:85772911-85785339	0.000203
UNC80	chr2:210402197-210556260	0.000207
CLIP4	chr2:29174074-29266008	0.000207
FAM182B	chr20:25692101-25796786	0.000207
PLCH2	chr1:2397613-2426829	0.000208
ARIH1	chr15:70553720-70662877	0.000208
FBXW2	chr9:122559074-122595561	0.000208
TAF1D	chr11:93034524-93114308	0.00021
WARS	chr14:99869877-99912433	0.000212
POLL	chr10:103328628-103338004	0.000215
CEP192	chr18:12998498-13115052	0.000215
SLC3A2	chr11:62380093-62412928	0.000217
NR2F2	chr15:94670542-94684496	0.000217
TPRG1L	chr1:3531415-3536549	0.00022
ENSG00000204955	chr5:140698537-140872730	0.000221
PHLDB1	chr11:117982422-118033951	0.000222
TPP2	chr13:102047373-102129522	0.000225
C6orf115	chr6:139391511-139406132	0.000225
ANTXR1	chr2:69093941-69329806	0.000226
ATG16L1	chr2:233825056-233869059	0.000227
YWHAQ	chr2:9641551-9688557	0.00023
LZTS2	chr10:102746954-102780876	0.000231
ARL4C	chr2:235066423-235070436	0.000231
PALM	chr19:659947-699328	0.000233
SECISBP2L	chr15:47068258-47125987	0.000237
SNRPB2	chr20:16658628-16670037	0.000237
DDX1	chr2:15648752-15688676	0.000245
LINS	chr15:98926957-98959927	0.000249
ZDHHC8	chr22:18499363-18515529	0.000252
FAM173A	chr16:710581-716460	0.000253
H3F3A	chr1:224316174-224326325	0.000258
CCDC51	chr3:48448173-48456533	0.00026
WDFY1	chr2:224448308-224518296	0.000261
DUSP18	chr22:29361792-29393872	0.000263
C6orf112	chr6:105692254-105734563	0.000263
DNAJC6	chr1:65503181-65654277	0.000275
IPO13	chr1:44185197-44206280	0.000275
PBLD	chr10:69712422-69772950	0.000277
ZNF646	chr16:30993262-31007631	0.000277
GNAI2	chr3:50248639-50271775	0.000279
POLR2J	chr7:101892394-101906715	0.000284
RNF121	chr11:71317730-71386289	0.000286
RAB11FIP4	chr17:26742767-26889356	0.000287
DPP9	chr19:4626237-4674875	0.000294
C8orf44	chr8:67751007-67936800	0.000295
ZSCAN30	chr18:31075016-31124170	0.000296
ENSG00000204576	chr6:30621674-30640159	0.000303
MBIP	chr14:35837521-35859596	0.000304
BEX2	chrX:102450937-102452601	0.000306
KALRN	chr3:125296274-125922726	0.000307
FOXJ3	chr1:42414796-42574135	0.000311
BTBD9	chr6:38250712-38673848	0.000314
SHROOM1	chr5:132185733-132194489	0.000316
ARPP21	chr3:35658852-35810992	0.000319
ANAPC5	chr12:120230543-120274585	0.00032
ZNF528	chr19:57592932-57647004	0.000323
RRAGD	chr6:90131435-90178714	0.000326
MAST4	chr5:65927931-66501179	0.000326
CCDC115	chr2:130812285-130816392	0.00033
TCEB2	chr16:2761415-2767298	0.000333
RIF1	chr2:151974673-152042109	0.000334
CTAGE5	chr14:38804226-38925907	0.000336
SET	chr9:130485995-130498488	0.000338
CNST	chr1:244796385-244898484	0.000342
ENSG00000168824	chr4:4400767-4594676	0.000352
SPAG16	chr2:213857360-214983284	0.000353
ARHGAP33	chr19:40939937-41034579	0.000359
PRMT2	chr21:46879954-46909291	0.000361
NSMCE4A	chr10:123706600-123724722	0.000364
SPHK2	chr19:53814359-53825473	0.000368
USP48	chr1:21877377-21982275	0.00037
PANX2	chr22:48951286-48960850	0.000377
EHMT1	chr9:139711439-139850397	0.00038
CCNDBP1	chr15:41264831-41274685	0.00039
GSTO2	chr10:106018620-106049166	0.0004
FEZ2	chr2:36436900-36678836	0.000405
NCL	chr2:232027705-232037449	0.000405
ENSG00000214967	chr16:16322750-16395300	0.000406
C17orf39	chr17:17883335-17912443	0.000411
TPM2	chr9:35671989-35680053	0.000417
GSN	chr9:123009895-123134942	0.00042
TTLL11	chr9:123624070-123895706	0.00043
PRMT1	chr19:54872349-54883516	0.000436
ARHGEF9	chrX:62771571-62922138	0.000436
CDH23	chr10:72826696-73245708	0.00044
CNR1	chr6:88906301-88932385	0.00044
TSPAN8	chr12:69805135-70264889	0.000443
SLC4A3	chr2:220200359-220214946	0.000449
FAM188A	chr10:15860174-15942525	0.000457
ENSG00000186060	chr17:18566126-18580157	0.000459
IFI6	chr1:27865158-27871311	0.00046
MAPK6	chr15:50098726-50145751	0.000468
MOCS1	chr6:39980812-40010229	0.000468
NUDT5	chr10:12211641-12332593	0.000469
HAUS6	chr9:19043141-19092902	0.000472
SYCP3	chr12:100615547-100657378	0.000474
NELL1	chr11:20647711-21553576	0.000479
STX4	chr16:30951916-30958985	0.000481
MOXD1	chr6:132658886-132764357	0.000481
SCP2	chr1:53165529-53289870	0.000482
PIGK	chr1:77327253-77457720	0.000484
ERBB4	chr2:211948690-213111810	0.000486
PAM	chr5:102229421-102394708	0.000487
PGM1	chr1:63831534-63898500	0.000495
MTHFSD	chr16:85121283-85157509	0.000511
STX5	chr11:62330944-62356136	0.000514
DYNLT1	chr6:158977493-158985759	0.000515
HDAC6	chrX:48545050-48568330	0.000522
POLH	chr6:43592768-43691375	0.000523
BCO2	chr11:111551417-111594853	0.000524
TBC1D7	chr6:13413164-13448166	0.000527
CUL4B	chrX:119542475-119593677	0.000528
CDNF	chr10:14901254-14953744	0.00053
SCNN1D	chr1:1204309-1217267	0.000532
NOTCH2	chr1:120255700-120413799	0.000533
SVIL	chr10:29786282-30064736	0.000533
SLC14A1	chr18:41558146-41585046	0.000534
ZCCHC24	chr10:80812090-80875389	0.000542
C11orf54	chr11:93114440-93135868	0.000543
CNBP	chr3:130371019-130385427	0.00055
RELA	chr11:65177648-65186959	0.000552
TIAL1	chr10:121322969-121346531	0.000556
DMPK	chr19:50964817-50977655	0.000558
ARHGAP5	chr14:31616245-31698685	0.00056
PSMD6	chr3:63971270-63984551	0.000561
NUDT11	chrX:51249602-51256188	0.000568
CTNNA2	chr2:79265864-80729416	0.000569
FBLN7	chr2:112612432-112662262	0.00057
DBI	chr2:119840973-119846592	0.000576
HYDIN2	chr16:69398792-69822070	0.000589
PRKCZ	chr1:1971768-2122397	0.000592
NRSN2	chr20:275667-283512	0.000595
UBE2F	chr2:238540394-238615696	0.0006
ACO2	chr22:40195074-40270556	0.000603
C7orf43	chr7:99589982-99594244	0.00061
ULK2	chr17:19614735-19711841	0.000615
KCNK2	chr1:213245507-213477059	0.000616
TIMP3	chr22:31238538-31784358	0.000619
HAS3	chr16:67697660-67723985	0.00063
MRPL38	chr17:71406318-71413089	0.000635
HIVEP2	chr6:143114296-143308031	0.000637
ENSG00000112473	chr6:33276580-33280191	0.000646
FCHSD2	chr11:72225438-72530954	0.000648
EGFL7	chr9:138673128-138686951	0.000648
ADK	chr10:75580970-76139066	0.000662
FANK1	chr10:127575097-127688151	0.000662
C18orf32	chr18:45262026-45267602	0.000671
BOLA2	chr16:29361069-29383801	0.000672
GGCT	chr7:30502763-30510977	0.000672
DCTN1	chr2:74441789-74472722	0.000679
ZNF644	chr1:91153446-91260358	0.000684
UTP14A	chrX:128866194-128891408	0.000696
PBRM1	chr3:52554422-52694892	0.000702
ROBO2	chr3:76069334-77779351	0.000702
D2HGDH	chr2:242322689-242356904	0.000704
SHPRH	chr6:146227151-146327252	0.000704
GAPVD1	chr9:127063928-127169307	0.000707
CELF1	chr11:47446521-47531264	0.000712
DBT	chr1:100425071-100487997	0.000718
MCM7	chr7:99528339-99554915	0.000721
FAM127A	chrX:133982208-134013871	0.000724
RGPD8	chr2:112842436-112908536	0.000741
WWOX	chr16:76691051-77803532	0.000749
SORBS2	chr4:186743591-187114516	0.000754
ERMP1	chr9:5774570-5823081	0.000758
SSBP2	chr5:80751427-81082828	0.000782
SSR4	chrX:152704415-152717147	0.000782
RPRD1A	chr18:31823784-31901491	0.000783
CST3	chr20:23556533-23567110	0.00079
TCEAL8	chrX:102394581-102396777	0.000798
NIPAL3	chr1:24614870-24672053	0.000801
STX7	chr6:132820746-132875928	0.000802
LRRC27	chr10:133995647-134112902	0.000809
MPZL1	chr1:165957825-166026682	0.00081
KIF5C	chr2:149502041-149591519	0.00082
S100B	chr21:46842967-46849549	0.000828
CRYZ	chr1:74943757-74971333	0.00083
MITF	chr3:69871275-70114726	0.000835
CRTC2	chr1:152186774-152197725	0.00084
NKRF	chrX:118606327-118623874	0.000844
ENSG00000214955	chr21:34367686-34437198	0.000851
VPS16	chr20:2763959-2967320	0.000871
YIF1B	chr19:43487583-43498446	0.000874
NEGR1	chr1:71641212-72521005	0.000875
PTPRF	chr1:43769133-43861930	0.000877
ENSG00000216866	chrX:40620752-40680071	0.000882
GPER	chr7:1003167-1144419	0.000887
KCTD6	chr3:58452880-58463119	0.00089
RFK	chr9:78190252-78199264	0.000893
ENSG00000213719	chr6:31806336-31815519	0.000903
MORN2	chr2:38956635-38963342	0.000908
PDZD2	chr5:31834787-32146794	0.000914
KDM2A	chr11:66644073-66781717	0.000922
RALGPS1	chr9:128716873-129025264	0.00093
SLC20A1	chr2:113119997-113137869	0.00093
RALGDS	chr9:134962927-135014542	0.00094
BDH1	chr3:198721050-198784591	0.000944
ZNF239	chr10:43371797-43390071	0.00095
MBD1	chr18:46049214-46062142	0.000954
ATRX	chrX:76647014-76928375	0.000971
LYRM7	chr5:130534534-130569018	0.000971
JMJD1C	chr10:64596986-64895728	0.000972
CENPP	chr9:94128042-94472368	0.000986
EXOSC3	chr9:37578409-38059249	0.000986
CUL5	chr11:107384617-107483676	0.000988
CSDE1	chr1:115061060-115102147	0.000999
SPATS2L	chr2:200878860-201055224	0.001002
SIPA1	chr11:65100084-65174965	0.001019
NUCB1	chr19:54095118-54118340	0.001031
DDHD1	chr14:52580435-52689750	0.001032
SURF4	chr9:135204889-135232791	0.001034
GALNT14	chr2:30986837-31215096	0.001043
MRPL24	chr1:154973717-154977547	0.001046
TRA2B	chr3:187110585-187138495	0.001056
RASGRF1	chr15:77041340-77169895	0.001056
SMPD4	chr2:130625449-130664769	0.001062
PHKB	chr16:46052738-46291657	0.001063
PRPF18	chr10:13668944-13712873	0.001068
STAT3	chr17:37718868-37794039	0.001083
FMR1	chrX:146801172-146840303	0.001087
ENSG00000114062	chr15:23133488-23235221	0.001089
KDSR	chr18:59145950-59185486	0.001101
GULP1	chr2:188864640-189168898	0.001103
STAU2	chr8:74495159-74821629	0.001118
REEP6	chr19:1442022-1448926	0.001125
ACADVL	chr17:7063854-7069311	0.001128
NCRNA00152	chr2:87536001-87687439	0.001134
FMO5	chr1:145124461-145163569	0.001146
RSL1D1	chr16:11835553-11852943	0.001146
PHF20L1	chr8:133856785-133930234	0.00115
ETV1	chr7:13897378-13997399	0.001153
MAN1B1	chr9:139101199-139123460	0.001174
EPC1	chr10:32596684-32707732	0.0012
RSU1	chr10:16672624-16899468	0.001202
UQCR10	chr22:28446343-28564265	0.001207
ELMO1	chr7:36860485-37455036	0.001217
ARHGAP24	chr4:86615290-87142847	0.00122
TBC1D23	chr3:101462552-101526768	0.001239
NSL1	chr1:210966117-211031762	0.00127
UBXN1	chr11:62200548-62203103	0.001298
RBM4	chr11:66140672-66170516	0.00131
CLDN15	chr7:100662092-100668821	0.001325
IQCE	chr7:2565157-2620893	0.001326
NPL	chr1:181025526-181066142	0.001335
WLS	chr1:68336739-68470854	0.001336
ZNF713	chr7:55922642-55976959	0.001346
PRPF40A	chr2:153216352-153282741	0.001364
TRAPPC3	chr1:36374761-36387685	0.001369
AGAP3	chr7:150414758-150472456	0.001372
CALD1	chr7:134114710-134306010	0.001373
CDC123	chr10:12211641-12332593	0.001373
ENSG00000197657	chr6:28400492-28444527	0.001375
USP7	chr16:8893451-8964842	0.001398
EVL	chr14:99507903-99680325	0.001412
ERCC1	chr19:50601306-50619017	0.001416
FGGY	chr1:59535327-60000988	0.001421
RND3	chr2:151032954-151052427	0.001422
LAMB3	chr1:207854842-207892443	0.001425
CYFIP2	chr5:156625668-156755184	0.001432
ENSG00000204356	chr6:32027845-32045509	0.001445
C7orf44	chr7:43645380-43735620	0.001452
CSAD	chr12:51837713-51860959	0.001463
NEFL	chr8:24864384-24870541	0.001465
HNRPDL	chr4:83563370-83570402	0.001466
FRMD5	chr15:41950256-42274700	0.001487
MEF2D	chr1:154700145-154737153	0.001487
UBE2D2	chr5:138920934-138988200	0.001499
HES6	chr2:238811648-238813421	0.001512
SMCR7L	chr22:38226050-38244079	0.001512
STEAP2	chr7:89678935-89708027	0.001522
CD74	chr5:149761398-149772525	0.001525
EVI2A	chr17:26446120-26728817	0.001527
GAL3ST1	chr22:29280621-29300574	0.001536
EIF4A2	chr3:187984054-187990377	0.001568
AFF3	chr2:99530149-100125469	0.001575
KRT222	chr17:36037510-36074934	0.001577
NDUFS5	chr1:39264592-39272873	0.001578
ELMO2	chr20:44428095-44468678	0.001589
CACNA1E	chr1:179648917-180037339	0.001601
FBXL17	chr5:107223347-107745010	0.001603
GDAP1L1	chr20:42309321-42342427	0.001613
BRSK2	chr11:1367704-1439902	0.001617
TSGA10	chr2:98980155-99137812	0.001625
CHPF	chr2:220111921-220123559	0.001634
TGOLN2	chr2:85398657-85409059	0.001635
ENSG00000185065	chr22:17808408-17815755	0.001643
NRG3	chr10:83624785-84736913	0.001653
ANKRD10	chr13:110328887-110365417	0.001664
ERI3	chr1:44459329-44593526	0.001696
PCMT1	chr6:150112272-150174249	0.001702
DUT	chr15:46410912-46422862	0.001709
MPG	chr16:67017-128859	0.00171
MAP2K2	chr19:4041318-4075126	0.001714
SMOX	chr20:4077449-4116394	0.001715
HSPA14	chr10:14901254-14953744	0.00172
BHLHB9	chrX:101862309-101895124	0.001737
RNF24	chr20:3861736-3944157	0.001755
DOCK9	chr13:98243741-98536661	0.001793
FAM149B1	chr10:74597929-74682457	0.001795
NCAPH2	chr22:49293537-49308767	0.001806
SLC26A8	chr6:36019272-36100355	0.001809
ANKRD24	chr19:4134322-4175811	0.00181
NQO2	chr6:2939230-2964995	0.001823
DUSP14	chr17:32924063-32947707	0.001833
MAPK8IP2	chr22:49385979-49396845	0.001834
SLC35A1	chr6:88239413-88278766	0.001836
IQCA1	chr2:236897532-237080924	0.001836
LRRC7	chr1:69806668-70361755	0.001852
APOLD1	chr12:12770129-12835664	0.001858
BTBD3	chr20:11819464-11855257	0.00186
NUDT10	chrX:51091822-51097117	0.001865
RIMS3	chr1:40858938-40903915	0.001887
MCTP1	chr5:94068956-94646035	0.00189
RTKN	chr2:74506496-74522568	0.00189
ENSG00000100357	chr22:39072478-39092697	0.001913
ARMC10	chr7:102502563-102527432	0.001915
RMND5A	chr2:86584063-86855943	0.001929
MIS12	chr17:5330631-5334857	0.00194
HNRNPC	chr14:20747134-20807478	0.001952
ERCC5	chr13:102296174-102326346	0.001952
DHX32	chr10:127502104-127559874	0.001953
METTL5	chr2:170363626-170389681	0.00196
RAN	chr12:129922520-129927316	0.001964
NDUFC1	chr4:140430520-140531972	0.001969
OXA1L	chr14:22305570-22310832	0.001977
EIF5	chr14:102870245-102881112	0.001992
PFKFB3	chr10:6226921-6317500	0.002
DAPK2	chr15:61986287-62125574	0.002003
FMNL3	chr12:48303669-48387464	0.002038
SUN1	chr7:822777-881083	0.002053
GPAA1	chr8:145209511-145213106	0.002056
TMCC2	chr1:203463660-203509094	0.002063
HECW2	chr2:196772221-197165580	0.002079
SERPIND1	chr22:19391980-19543070	0.002111
FAM133A	chrX:92815860-92853917	0.002124
ACVRL1	chr12:50587468-50603412	0.002142
EPHA4	chr2:221990992-222147166	0.002153
ANP32A	chr15:66845403-66900277	0.002158
RCBTB1	chr13:49004082-49057720	0.002172
USP8	chr15:48503870-48626194	0.002203
MTIF3	chr13:26907779-26922711	0.002209
B2M	chr15:42790976-42813611	0.00221
ROR1	chr1:64012280-64419769	0.002234
GPR125	chr4:21998096-22126770	0.002269
USMG5	chr10:105117713-105146213	0.002294
DHX30	chr3:47819654-47866686	0.002304
ADAM10	chr15:56675801-56829469	0.002316
SRRM3	chr7:75669151-75754539	0.002318
DPP10	chr2:114916345-116319798	0.00234
BCAR3	chr1:93799935-94085294	0.00236
KLHL7	chr7:23111926-23207149	0.002361
ABCC10	chr6:43503269-43531764	0.002366
DLAT	chr11:111401373-111440324	0.002398
UBQLN1	chr9:85464698-85512773	0.002405
PDHA1	chrX:19271971-19287886	0.002405
GPS1	chr17:77603051-77608635	0.002408
NUBP2	chr16:1763229-1779187	0.002428
SH3KBP1	chrX:19462045-19815640	0.002444
THOC2	chrX:122562093-122694587	0.002467
ZRSR2	chrX:15718494-15751385	0.00247
RRP1	chr21:44033821-44049602	0.002472
ENSG00000143390	chr1:149579739-149586426	0.002477
MON1A	chr3:49921311-49942261	0.002483
TBR1	chr2:161980865-161989819	0.00251
TMEM87A	chr15:40290040-40352930	0.002517
POLQ	chr3:122632963-122748178	0.00252
SNX33	chr15:73728402-73738021	0.002521
ZUFSP	chr6:117063473-117096650	0.002542
ENSG00000137312	chr6:30803491-30818443	0.00256
ARHGEF11	chr1:155171256-155281786	0.002581
LARP4B	chr10:845483-967440	0.002599
FAM178A	chr10:102662315-102714879	0.00261
POLR1C	chr6:43592768-43691375	0.002614
UBE4B	chr1:10015602-10163876	0.00263
ENAH	chr1:223741156-223907468	0.002648
AK5	chr1:77520249-77798238	0.00265
NCALD	chr8:102767946-103206311	0.002666
ATXN1	chr6:16407321-16869700	0.00268
SLC2A8	chr9:129199285-129209955	0.002683
PHF6	chrX:133335007-133390485	0.002686
TFDP2	chr3:143154013-143350992	0.002704
AK4	chr1:65385819-65470407	0.002709
NLGN4Y	chrY:15144025-15466924	0.002721
PHACTR1	chr6:12825818-13403797	0.002724
RGS11	chr16:224545-265930	0.002727
ARHGEF1	chr19:47079105-47103437	0.002742
DDRGK1	chr20:3119020-3133331	0.002807
ASB13	chr10:5714922-5748532	0.002819
C22orf30	chr22:30402241-30476117	0.002861
TLE2	chr19:2948636-2980022	0.002864
TRIB2	chr2:12774465-12800311	0.002865
C5orf56	chr5:131774226-131839635	0.002888
PAQR6	chr1:154479830-154484471	0.002934
VDAC2	chr10:76640568-76661208	0.002942
C2orf88	chr2:190710730-190776453	0.002944
DHDDS	chr1:26631359-26670380	0.002969
IRF9	chr14:23686498-23706451	0.00299
NEURL	chr10:105244037-105342292	0.003012
NPHP3	chr3:133759671-133923993	0.003044
2003-09-01	chr22:40702761-40724171	0.003071
KTN1	chr14:55116677-55221054	0.003075
USP45	chr6:99986910-100070029	0.003085
MORC2	chr22:29652599-29694187	0.003086
PSRC1	chr1:109623698-109627331	0.003108
PCK2	chr14:23619155-23664288	0.003122
NPSR1	chr7:34356558-34884469	0.003124
CCDC3	chr10:12978632-13220297	0.003138
FABP7	chr6:123142344-123146915	0.00314
PUS1	chr12:130979741-130994355	0.003177
SULF2	chr20:45719062-45848215	0.003187
ESD	chr13:46243392-46269368	0.00319
AARSD1	chr17:38356072-38386033	0.003191
ADARB2	chr10:1218072-1769670	0.003204
GAPDH	chr12:6513917-6517797	0.003225
RASL10A	chr22:28038921-28041748	0.003254
SLC31A1	chr9:115023637-115068495	0.003256
LMLN	chr3:199171467-199254988	0.003269
PHF15	chr5:133889245-133946817	0.003291
GJB6	chr13:19694101-19704456	0.003311
SEMA4G	chr10:102722275-102737262	0.003313
ZNF174	chr16:3391244-3399361	0.003327
C22orf25	chr22:18384536-18433449	0.003327
ETS1	chr11:127833873-127948235	0.003348
EIF4G1	chr3:185515049-185535839	0.003358
PPM1F	chr22:20603792-20637217	0.003361
KLHL24	chr3:184836104-184884996	0.003377
PITPNB	chr22:26577657-26645255	0.00339
FANCL	chr2:58127223-58322018	0.00339
ELAVL2	chr9:23680101-23816335	0.003391
RBM10	chrX:46886558-46931156	0.003391
TAB3	chrX:30755479-30903122	0.003413
CCNL2	chr1:1311737-1324560	0.003419
GSTM2	chr1:110012193-110053694	0.003443
PDXDC1	chr16:14976486-15140696	0.003445
HDDC3	chr15:89274413-89298326	0.003519
TMTC4	chr13:100054091-100125171	0.003566
SNX27	chr1:149851181-149938183	0.00361
AK1	chr9:129668579-129679843	0.003629
PRPF38B	chr1:109036468-109056124	0.003633
PDE4B	chr1:66030784-66612850	0.003651
TMEM108	chr3:134239942-134597745	0.003652
DLG3	chrX:69581448-69642062	0.003663
KHDC1	chr6:73975313-74076809	0.003668
CCNC	chr6:100096984-100123411	0.003674
LRPPRC	chr2:43968390-44076648	0.003705
FAM38A	chr16:87300391-87330317	0.003729
RER1	chr1:2242555-2346079	0.00373
ENSG00000204642	chr6:29798530-29824805	0.003733
ESF1	chr20:13642968-13713541	0.003741
QPCT	chr2:37425240-37453968	0.003746
TBC1D22A	chr22:45537192-45948399	0.003755
2001-03-01	chr4:164667737-164994733	0.003771
PDIK1L	chr1:26310912-26324608	0.003798
GAS2L1	chr22:28032996-28038774	0.003799
FMNL2	chr2:152899996-153214594	0.003806
YOD1	chr1:205283816-205292948	0.003811
FAM165B	chr21:34669618-34696945	0.003871
NLRC3	chr16:3529038-3567402	0.003919
SARS	chr1:109558062-109582308	0.003926
LAMA1	chr18:6931887-7107813	0.00393
LPAR1	chr9:112675364-112840186	0.00395
AMD1	chr6:111302679-111323609	0.003984
SLC35B1	chr17:45133688-45140525	0.00402
MANBAL	chr20:35351464-35379077	0.004029
PTPRN2	chr7:157024510-158073241	0.004052
MTUS2	chr13:28496747-28978083	0.004084
SLC38A5	chrX:48201865-48213509	0.004101
ZDHHC12	chr9:130504622-130526229	0.004108
JPH4	chr14:23095070-23117849	0.004119
INTS3	chr1:151967166-152013179	0.004159
C10orf26	chr10:104525877-104565987	0.004161
NR2C1	chr12:93939801-93991499	0.004166
TCF20	chr22:40885962-40941389	0.004168
KIAA1826	chr11:105383839-105398164	0.004195
ATP7A	chrX:77052849-77192208	0.004232
SGSM2	chr17:2187555-2231094	0.004234
ENSG00000204287	chr6:32515624-32520801	0.004237
C10orf119	chr10:121578961-121622384	0.004237
RHOC	chr1:113045250-113051548	0.004243
RUFY1	chr5:178910164-178969633	0.004254
GABRA2	chr4:45946340-46086561	0.004263
RBBP8	chr18:18767292-18860447	0.004273
TF	chr3:134901900-134980540	0.004274
USP20	chr9:131637545-131683928	0.004274
XRCC6	chr22:40347240-40389998	0.004275
UBAP2	chr9:33911690-34038947	0.004298
SLC26A1	chr4:962864-988316	0.004302
GPR153	chr1:6229992-6243622	0.004315
TSEN34	chr19:59386008-59389337	0.004315
NAB1	chr2:191222040-191265734	0.004318
ENSG00000149131	chr11:57121435-57138902	0.004318
VPS24	chr2:86584063-86855943	0.004334
CBS	chr21:43346369-43369541	0.004339
CHD2	chr15:91244422-91372237	0.004403
TRAPPC9	chr8:140811769-141537845	0.004407
ENSG00000162647	chr1:109432405-109441076	0.004412
TRMT2B	chrX:100150991-100193758	0.004464
C2orf28	chr2:27275962-27293550	0.004483
PIK3C2B	chr1:202658392-202726097	0.004489
LMBR1	chr7:156166331-156378663	0.004489
LNX1	chr4:53938583-54152481	0.00451
HS1BP3	chr2:20681044-20714345	0.004523
C1orf85	chr1:154485640-154532087	0.004558
CTNS	chr17:3486510-3518722	0.004618
FERMT2	chr14:52393735-52487460	0.004631
HUWE1	chrX:53575781-53730398	0.004643
DPP6	chr7:153215114-154316928	0.004656
ABLIM3	chr5:148501246-148620192	0.004697
GRIK2	chr6:101953384-102624651	0.004732
CECR5	chr22:15998410-16026177	0.004738
GTF2A2	chr15:57718356-57737011	0.004743
NUDC	chr1:27120810-27145475	0.004776
SNRPC	chr6:34833274-34849545	0.004781
ARMC6	chr19:19005470-19029978	0.004847
ENSG00000138375	chr2:216985440-217056021	0.004854
ZBTB16	chr11:113435524-113626605	0.004858
SIK3	chr11:116219327-116474347	0.004859
C14orf138	chr14:49645091-49653047	0.004873
CLDND1	chr3:99717007-99724600	0.004888
PFKP	chr10:3099739-3169762	0.004931
PDCD10	chr3:168884390-168935345	0.004938
KIAA1704	chr13:44461686-44505742	0.004958
MAP1A	chr15:41590447-41611110	0.004974
SNPH	chr20:1154699-1237972	0.004987
KCNC3	chr19:55507005-55524446	0.005032
OCLN	chr5:68823874-69042097	0.005074
ZBED1	chrX:2147556-2429008	0.005075
INTS7	chr1:210181312-210275507	0.005075
TMEM208	chr16:65818516-65820683	0.005086
ENSG00000179571	chr1:16762998-16812569	0.005106
NINL	chr20:25381340-25514153	0.005143
SUN2	chr22:37460675-37520149	0.005145
C20orf29	chr20:3749177-3753954	0.005164
LTB4R	chr14:23838907-23857082	0.005174
ENSG00000221956	chr2:74535736-74538581	0.005207
ATP2B4	chr1:201862311-201984201	0.005212
ENSG00000105972	chr7:882716-902599	0.005259
TSSC4	chr11:2378433-2381679	0.005284
GYG2	chrX:2756858-2810858	0.005317
LDHB	chr12:21679542-21702043	0.005327
ENSG00000204560	chr6:30722987-30748736	0.005327
TBL3	chr16:1962064-1968752	0.005329
CACNG7	chr19:59104400-59139007	0.005338
CALN1	chr7:70882411-71549982	0.005378
CPPED1	chr16:12661157-12805245	0.005384
TMOD1	chr9:99303741-99475851	0.0054
RBP4	chr10:95341433-95351491	0.00541
ENSG00000173372	chr1:22835704-22838762	0.00542
KLHL28	chr14:44463297-44500929	0.005422
SEMA4D	chr9:91181971-91260688	0.005431
SETD7	chr4:140646641-140697373	0.005432
HEBP2	chr6:138767028-138776275	0.005454
FAM179A	chr2:29032980-29128600	0.005463
RNF40	chr16:30681099-30695129	0.005475
PSMB5	chr14:22564899-22573949	0.005572
ASMTL	chrX:1482031-1531844	0.005581
C1orf174	chr1:3795562-3806709	0.005591
BCL11A	chr2:60531805-60634272	0.005629
RHOBTB1	chr10:62299207-62431204	0.005653
RBM3	chrX:48272499-48321742	0.00569
SPEG	chr2:220007811-220066598	0.005801
KLF6	chr10:3811259-3817455	0.005816
BCOR	chrX:39794011-39921526	0.005817
HSPG2	chr1:22011344-22136297	0.005863
PPP2R3A	chr3:137167256-137349423	0.005866
EIF1AY	chrY:21146998-21164427	0.005881
WDR81	chr17:1566579-1588636	0.005882
SMNDC1	chr10:112042788-112054687	0.005883
RCAN2	chr6:46296427-46567668	0.005894
MED12	chrX:70255130-70279028	0.005955
DNAJC1	chr10:22085483-22332704	0.005971
SETD3	chr14:98933854-99016991	0.005974
BCAP31	chrX:152619145-152643081	0.006019
PPP6R2	chr22:49128598-49230380	0.006028
SMUG1	chr12:52861518-52869024	0.006042
RPL35	chr9:126655575-126664061	0.006056
ADCY6	chr12:47446247-47469087	0.006076
FBXO9	chr6:53037754-53073630	0.00612
FAM169A	chr5:74109154-74198371	0.006121
ATXN7L2	chr1:109828083-109836949	0.006184
GPT	chr8:145624998-145703357	0.00624
CAPZB	chr1:19537856-19684594	0.006257
PLXDC1	chr17:34473082-34561298	0.006289
RAE1	chr20:55359551-55387674	0.006318
ATN1	chr12:6903886-6921743	0.006326
ACAD9	chr3:130081143-130147499	0.006361
TMEM155	chr4:122899534-122907412	0.006408
MICAL1	chr6:109871960-109883883	0.006419
SKP2	chr5:36187945-36219902	0.006421
USP42	chr7:6111075-6167717	0.00644
MEST	chr7:129913281-129933363	0.006448
TADA2A	chr17:32841077-32911709	0.006462
THOP1	chr19:2736505-2764588	0.006466
IWS1	chr2:127954859-128000932	0.006501
MARK4	chr19:50446389-50500381	0.006518
MMD2	chr7:4912145-4965370	0.00659
C2CD2	chr21:42178287-42247068	0.00659
CDHR1	chr10:85944385-85969354	0.006594
CDC37L1	chr9:4669558-4697634	0.006676
ENSG00000148123	chr9:102830851-103127238	0.006682
PCNXL2	chr1:231186504-231498082	0.006685
ZNF275	chrX:152252806-152271578	0.006705
ENSG00000221879	chr1:148532892-148550873	0.006716
NUP50	chr22:43938389-43962556	0.006721
DSCAM	chr21:40304795-41140935	0.006724
HNRNPUL1	chr19:46460263-46505438	0.006753
DOK5	chr20:52525569-52701097	0.006786
RASSF2	chr20:4708669-4752291	0.006823
C17orf101	chr17:77943388-78001983	0.006828
FAM40A	chr1:110375721-110398784	0.006833
ENSG00000215067	chr17:6829165-6856377	0.006847
NT5DC1	chr6:116528691-116673545	0.006854
INPP5B	chr1:38098955-38185316	0.006967
ANKS6	chr9:100534098-100599068	0.006975
MLLT4	chr6:167970519-168115552	0.006992
TIMP1	chrX:47305521-47364200	0.006998
TRIM66	chr11:8590159-8649989	0.007043
C15orf39	chr15:73278285-73291563	0.007056
RBFA	chr18:75895345-75907373	0.007058
CORO6	chr17:24944611-24974043	0.007058
RANGRF	chr17:8131806-8139386	0.007061
SYNCRIP	chr6:86379318-86409746	0.007102
MED22	chr9:135197576-135204793	0.007112
PTOV1	chr19:55045949-55055802	0.007171
RPL23	chr17:34257643-34263579	0.007195
AGPAT6	chr8:41554875-41598588	0.007212
TMEM57	chr1:25630005-25698515	0.007225
USP47	chr11:11819545-11937448	0.007353
FOXP4	chr6:41622141-41678099	0.007399
PIBF1	chr13:72254230-72488593	0.007461
ZNF25	chr10:38278800-38305561	0.007463
DUS1L	chr17:77609042-77629242	0.007485
LSM5	chr7:32492941-32501420	0.007504
PIK3R1	chr5:67558217-67633403	0.007505
TMEM30A	chr6:76004110-76051221	0.007514
ACBD4	chr17:40568579-40577324	0.007515
SGK1	chr6:134532082-134680291	0.007526
CC2D1B	chr1:52588854-52604452	0.00754
FANCC	chr9:96901157-97119812	0.007548
ZSCAN22	chr19:63530196-63545507	0.007563
ENSG00000204348	chr6:32045565-32057202	0.00772
CACNA2D3	chr3:54131732-55083622	0.007723
TSC2	chr16:2037990-2125900	0.00773
STK40	chr1:36577811-36624084	0.00776
PNRC1	chr6:89847188-89851598	0.007772
CIT	chr12:118607980-118799475	0.007783
RPS9	chr19:59396537-59403327	0.007811
JARID2	chr6:15354505-15630232	0.007891
CXADR	chr21:17807200-17887768	0.00792
HMBOX1	chr8:28803829-28966706	0.007996
PTPDC1	chr9:95832896-95911957	0.00802
CSRNP3	chr2:166034453-166245435	0.008055
ENSG00000203876	chr10:111691018-111885310	0.008086
CYHR1	chr8:145624998-145703357	0.008101
OLA1	chr2:174645420-174821611	0.008122
ATP10B	chr5:159922706-160211797	0.008155
ARPC5	chr1:181859023-181871608	0.00819
DARC	chr1:157439720-157442914	0.008194
SESN1	chr6:109414339-109521970	0.008211
PJA1	chrX:68297421-68302089	0.008217
DGAT2	chr11:75157455-75190227	0.008248
MAGED1	chrX:51562894-51662190	0.008259
ARHGAP22	chr10:49324084-49483182	0.008269
GSTM1	chr1:110012193-110053694	0.008296
SEZ6L2	chr16:29790331-29818074	0.008308
MGAT1	chr5:180150146-180175147	0.00838
USP11	chrX:46977257-46992671	0.008382
ZNF546	chr19:45194868-45253952	0.008402
PDE7B	chr6:136214526-136558402	0.008453
PRPF8	chr17:1500673-1534926	0.008476
ACBD5	chr10:27524148-27571065	0.008539
DAK	chr11:60857229-60872806	0.00855
ACRC	chrX:70714985-70750158	0.008822
FAM84A	chr2:14690274-14699871	0.008839
ZNF334	chr20:44563115-44575605	0.008845
EXTL2	chr1:101110530-101134142	0.008906
VKORC1	chr16:31009663-31014802	0.008965
ENSG00000078872	chr20:33720024-33752320	0.008973
MAP2K5	chr15:65622074-65886506	0.009011
NRBP1	chr2:27504160-27518630	0.009042
YWHAH	chr22:30659506-30683590	0.009052
VWA1	chr1:1360771-1366008	0.009105
CCDC14	chr3:125115257-125163254	0.009121
ITSN2	chr2:24279236-24437087	0.009132
HNRNPH1	chr5:178973784-178984276	0.009165
ENSG00000101898	chrX:119622048-119630266	0.009187
SNX24	chr5:122209169-122372796	0.009247
DCAF11	chr14:23619155-23664288	0.009247
BSDC1	chr1:32603375-32632614	0.009247
CUL1	chr7:148025938-148129134	0.009272
GADD45G	chr9:91409747-91411283	0.009362
SLC2A4RG	chr20:61841654-61933041	0.009399
ZMYM6	chr1:35219764-35270156	0.009403
PGPEP1	chr19:18312396-18526861	0.009406
MYO7A	chr11:76516957-76603932	0.009469
MAP2K3	chr17:21128560-21159118	0.009476
C21orf2	chr21:44574200-44583713	0.00953
DHRS11	chr17:32022338-32031324	0.00956
STRA13	chr17:77569867-77574083	0.00958
IVNS1ABP	chr1:183532146-183553091	0.009615
C22orf29	chr22:18124225-18222462	0.009648
TM2D2	chr8:38965483-38973198	0.009663
MPRIP	chr17:16886798-17029612	0.009704
PLCH1	chr3:156576062-156876522	0.009716
CTSL1	chr9:89530253-89536200	0.009734
C1orf115	chr1:218930166-218939116	0.009734
SRSF5	chr14:69303581-69308475	0.009757
MIOS	chr7:7573030-7613628	0.009862
ORMDL1	chr2:190343294-190357342	0.009864
SUOX	chr12:54677309-54685576	0.009868
FAM189A2	chr9:71134060-71197191	0.009918
TMEM209	chr7:129591790-129632574	0.009972
MYO1B	chr2:191818374-191998360	0.009985
UBE2J2	chr1:1179156-1199097	0.010045
IFITM1	chr11:301316-305271	0.010065
FBXO25	chr8:346807-409871	0.010087
NXPH1	chr7:8440109-8759118	0.010088
RPS6KB1	chr17:55325224-55382564	0.010107
IMP3	chr15:73718480-73728102	0.010168
QPRT	chr16:29597937-29616806	0.010181
TOMM40	chr19:50086333-50098775	0.010288
PQBP1	chrX:48635675-48645363	0.01032
ZC3H11A	chr1:202031421-202089875	0.010386
TJAP1	chr6:43553288-43582269	0.010404
ZNF211	chr19:62824646-62845947	0.010466
MKL1	chr22:39096540-39362651	0.010476
KLC4	chr6:43135349-43150815	0.010499
PFDN5	chr12:51975501-51979497	0.010535
ZNF160	chr19:58163316-58298499	0.01056
DUS4L	chr7:106630226-107006204	0.010619
DCP1A	chr3:53292489-53356677	0.010625
FOXO4	chrX:70232750-70240110	0.010652
SRSF6	chr20:41519931-41525655	0.010683
ANKRD32	chr5:93880682-94059082	0.010685
SLC25A35	chr17:8131806-8139386	0.010715
TAPT1	chr4:15771225-15837259	0.010782
BCL11B	chr14:98705376-98807614	0.010869
PRMT5	chr14:22459572-22468501	0.010935
CDC16	chr13:114018463-114056300	0.010951
DBNDD1	chr16:88598781-88613438	0.010958
RPP38	chr10:15172918-15250701	0.010966
TTBK1	chr6:43319199-43363975	0.010966
HIST1H2BK	chr6:27214051-27222598	0.010983
USP1	chr1:62674562-62690061	0.011037
VSTM2A	chr7:54577511-54606267	0.011092
EPHA6	chr3:98016310-98950235	0.011123
DIDO1	chr20:60979534-61039719	0.011141
KIAA1949	chr6:30752144-30763651	0.011249
ACIN1	chr14:22597615-22639500	0.01125
DLC1	chr8:12985242-13416766	0.01125
ALDH1A1	chr9:74705407-74757792	0.011294
ARAP1	chr11:72073762-72141095	0.011308
OSBPL11	chr3:126730391-126796624	0.011336
FAM178B	chr2:96905349-97001446	0.011406
ARHGAP20	chr11:109952975-110088661	0.011438
ADAMTS6	chr5:64465551-64813460	0.011467
KIF5B	chr10:32340076-32385334	0.011504
NONO	chrX:70420164-70437743	0.01156
C17orf95	chr17:72234534-72245007	0.011576
MEMO1	chr2:31946395-32089547	0.011601
YDJC	chr22:20312380-20314340	0.011616
ALG6	chr1:63605885-63675464	0.011625
PFDN6	chr6:33354863-33374716	0.011632
ZNF358	chr19:7487003-7491912	0.011634
PDE4DIP	chr1:143562783-143787552	0.011678
TM7SF2	chr11:64635916-64640282	0.011765
SLC25A29	chr14:99827200-99842613	0.011779
HMGN4	chr6:26646550-26655139	0.011781
PSMC5	chr17:59258541-59263118	0.01188
FAM3A	chrX:153387695-153397757	0.01197
CLOCK	chr4:55993416-56107754	0.011984
CDKN1A	chr6:36754464-36763086	0.012038
REPS1	chr6:139267313-139351096	0.012106
ZNF682	chr19:19976226-20011277	0.012143
ENSG00000066379	chr6:30137012-30140665	0.012149
DNAJB14	chr4:101039590-101086775	0.012201
CLIC5	chr6:45974170-46155938	0.012276
VAV2	chr9:135616836-135847547	0.012332
SLC23A2	chr20:4781001-4938939	0.012415
UBB	chr17:16225091-16226779	0.012431
FAM59A	chr18:28101460-28304445	0.012442
SGMS2	chr4:108965167-109051558	0.01248
LENG8	chr19:59652207-59666706	0.012514
CD160	chr1:144407154-144426971	0.012529
DENND4B	chr1:152168600-152185796	0.012532
TMEM9	chr1:199370523-199407325	0.012626
MAP3K15	chrX:19288094-19443300	0.012634
NEK6	chr9:126059705-126155407	0.012714
IAH1	chr2:9532115-9546201	0.012732
PEX5L	chr3:181000743-181237211	0.012743
C9orf9	chr9:134590787-134755239	0.012788
MYLIP	chr6:16237295-16256458	0.012994
ENSG00000170919	chr13:44813479-44863857	0.012996
ZNF32	chr10:43459313-43464332	0.013019
ANAPC11	chr17:77442894-77451655	0.013055
MCM9	chr6:119241320-119298002	0.013068
ENSG00000141524	chr17:73615079-73650644	0.013068
NDUFV2	chr18:9092724-9124343	0.01311
CPE	chr4:166519539-166638926	0.01312
KANK1	chr9:460290-736105	0.013213
PRODH	chr22:17280294-17304066	0.013224
TDRD9	chr14:103464551-103588755	0.01325
ST6GALNAC6	chr9:129687420-129701753	0.013255
LUC7L3	chr17:46151962-46185069	0.013287
MPDU1	chr17:7427853-7434212	0.013322
BCL2L12	chr19:54854641-54868984	0.013333
RPS16	chr19:44615691-44618458	0.013414
WASF3	chr13:26029839-26161080	0.013441
COQ10B	chr2:198026461-198048096	0.013501
MRPL1	chr4:79002697-79092968	0.013502
PROX1	chr1:212228482-212281219	0.013514
SYP	chrX:48931200-48943606	0.013522
C2orf43	chr2:20747283-20886355	0.013554
ANXA6	chr5:150460460-150517565	0.013603
UBXN11	chr1:26481359-26519600	0.013712
DNAH6	chr2:84597089-84900224	0.013724
EXOC3L	chr16:65765370-65781608	0.01375
SGCE	chr7:94052473-94123457	0.013807
AHNAK	chr11:61957591-62070908	0.013858
AKAP9	chr7:91408127-91577925	0.013875
ODF2L	chr1:86581340-86634591	0.01393
NHS	chrX:17303801-17664032	0.013956
MOBKL2C	chr1:46845973-46855150	0.013971
SOBP	chr6:107918009-108089195	0.013975
ENSG00000131023	chr6:150023743-150081085	0.013986
AFF4	chr5:132238969-132327253	0.014018
HIP1R	chr12:121885991-121913460	0.014045
BMI1	chr10:22650145-22660188	0.014053
COX11	chr17:50333202-50401053	0.014055
FKBP2	chr11:63764988-63768262	0.014081
G3BP1	chr5:151131663-151172539	0.014085
ENSG00000206156	chr16:270606-273004	0.014224
TTC19	chr17:15820598-16059570	0.01423
RNF220	chr1:44643452-44912702	0.014337
C12orf29	chr12:86953398-87060124	0.014338
ZSCAN18	chr19:63287021-63301428	0.014368
TPI1	chr12:6846543-6852713	0.014385
PPP1R8	chr1:28029879-28050770	0.014385
DLGAP1	chr18:3486029-3870135	0.014408
LCOR	chr10:98582028-98708680	0.014416
HAGHL	chr16:716958-737296	0.01443
ACAP3	chr1:1217632-1233132	0.014451
ETV6	chr12:11694054-11939588	0.01446
PRRT1	chr6:32224113-32228838	0.014493
PABPN1	chr14:22859336-22865202	0.014511
WIBG	chr12:54581463-54607812	0.014565
HBA2	chr16:162874-163709	0.014592
BTF3L4	chr1:52294384-52328976	0.014599
PGAP2	chr11:3775717-3804177	0.0146
MPV17	chr2:27385863-27402051	0.014609
SMCR7	chr17:18104593-18109820	0.01462
MORF4L2	chrX:102817079-102829648	0.014683
SARDH	chr9:135518506-135594863	0.014683
RAB1B	chr11:65777734-65801539	0.014732
TEAD1	chr11:12652544-12922874	0.014763
S100A16	chr1:151845985-151852183	0.014805
CARD8	chr19:53403324-53444737	0.014847
KATNA1	chr6:149957701-150011543	0.014852
ARID4B	chr1:233396832-233558155	0.014866
HOMER3	chr19:18901011-18913012	0.014898
FAM65B	chr6:24912491-25019174	0.014917
DAP3	chr1:153925472-153975425	0.014995
MTMR7	chr8:17199922-17315207	0.01501
NBPF3	chr1:21639216-21684085	0.015027
GLRX2	chr1:191332222-191341867	0.015032
IFI16	chr1:157236381-157291569	0.015148
FAHD1	chr16:1817226-1867442	0.015154
NLRX1	chr11:118544292-118559935	0.015189
AKT1S1	chr19:55064106-55083812	0.015258
CHRDL1	chrX:109803739-109925695	0.015293
DISP1	chr1:221112235-221245958	0.015299
SHARPIN	chr8:145225523-145231128	0.015319
CAPZA1	chr1:112867665-113015764	0.015423
KIAA0922	chr4:154606947-154777313	0.015431
ATP5E	chr20:57027703-57040817	0.015443
MOV10L1	chr22:48870609-48942246	0.015447
SLC2A3	chr12:7963093-7982246	0.01546
APEX1	chr14:19985055-20015086	0.015484
SRCIN1	chr17:33939784-34015709	0.015485
DMKN	chr19:40679962-40696394	0.015486
USP33	chr1:77934263-77998125	0.015491
CTPS	chr1:41217950-41250813	0.015499
SPOCK2	chr10:73488798-73518773	0.015538
B9D1	chr17:19187075-19206639	0.015558
ENSG00000221850	chr8:144420981-144430474	0.015585
HSD11B1L	chr19:5632034-5639532	0.015592
GLRX	chr5:95175430-95184198	0.015621
SCN2A	chr2:165804157-165957064	0.015632
TIE1	chr1:43539250-43561366	0.015695
NMRAL1	chr16:4451696-4464897	0.015716
PRPSAP2	chr17:18700366-18775306	0.015879
ENSG00000093100	chr22:16697103-16769601	0.01588
PRMT6	chr1:107400823-107403439	0.015902
DOLPP1	chr9:130883210-130892537	0.015912
ZNF226	chr19:49344687-49373676	0.015913
CCDC104	chr2:55600285-55625719	0.015918
TSN	chr2:122229590-122241899	0.015956
ATF4	chr22:38245645-38248637	0.015983
SYT1	chr12:77781903-78369917	0.015994
HSD17B6	chr12:55443374-55467841	0.015998
[truncated: 46 more rows]
