# Supplementary material for: Transcriptome Sequencing Revealed Significant Alteration of Cortical Promoter Usage and Splicing in Schizophrenia
Source: PLoS One. 2012 Apr 27;7(4):e36351. doi: 10.1371/journal.pone.0036351 (PMC3338678; doi:10.1371/journal.pone.0036351)
Supplement: Table S7 — Genes with significant alternative splicing (FDR<0.05) between schizophrenia cases and controls. (XLS) [file pone.0036351.s007.xls]

## Sheet: Sheet1
Table S7. Genes with significant alternative splicing (FDR<0.05) between schizophrenia cases and controls
Gene Symbol	Locus	p value
CLASP2	chr3:33512744-33734852	0
NFASC	chr1:203064445-203258573	0
CBLB	chr3:106859798-107070577	0
ARMC8	chr3:139388837-139530895	0
PPARG	chr3:12304069-12450855	0
PBRM1	chr3:52554422-52694892	0
PLD1	chr3:172801313-173010929	0
ECE2	chr3:185450138-185493513	0
DLG1	chr3:198253827-198509844	0
OGG1	chr3:9765704-9786661	0
MARK1	chr1:218768190-218904421	0
CAMK1	chr3:9765704-9786661	0
SEC13	chr3:10317614-10337855	0
COLQ	chr3:15466643-15538262	0
TP53BP2	chr1:222034218-222100297	0
ZNF197	chr3:44630801-44664967	0
RASSF1	chr3:50342220-50353385	0
TAF5L	chr1:227795480-227828417	0
DISC1	chr1:229829183-230243637	0
CD200	chr3:113534605-113564346	0
OPA1	chr3:194793706-194898294	0
RGS12	chr4:3285671-3411436	0
PDLIM5	chr4:95592060-95808400	0
FGF2	chr4:123967312-124063573	0
RAB28	chr4:12978446-13095060	0
PDLIM3	chr4:186659904-186693650	0
VCAN	chr5:82803338-82912737	0
HTR4	chr5:147810787-148013934	0
KCNIP1	chr5:169713458-170096212	0
ZNF608	chr5:123994026-124108704	0
RAPGEF6	chr5:130775085-130998828	0
NRG2	chr5:139207443-139403063	0
ANKHD1	chr5:139761612-139909347	0
PPP2R2B	chr5:145949259-146415783	0
IL6ST	chr5:55266679-55431094	0
RAD17	chr5:68683310-68746384	0
CLSTN1	chr1:9634376-9807137	0
APITD1	chr1:10412745-10434797	0
CDC23	chr5:137542585-137576931	0
APBB3	chr5:139918037-139924373	0
MAD2L2	chr1:11657124-11674294	0
FGF1	chr5:141951926-142057801	0
BNIP1	chr5:172504145-172523950	0
PDLIM7	chr5:176843000-176857208	0
FYN	chr6:112089189-112301320	0
C6orf170	chr6:121442325-121697343	0
RABGAP1L	chr1:172395170-173226353	0
ENSG00000204463	chr6:31714783-31733965	0
DST	chr6:56430743-56927363	0
COL9A1	chr6:70982528-71069494	0
PKIB	chr6:122806194-123089217	0
ECHDC1	chr6:127651549-127706447	0
LAMA2	chr6:129245978-129879401	0
AHI1	chr6:135646816-135871912	0
PHACTR2	chr6:143971009-144194014	0
SMOC2	chr6:168584679-168815214	0
ENSG00000137343	chr6:30702597-30722582	0
HSPA1A	chr6:31891298-31893702	0
ENSG00000204248	chr6:33238435-33268254	0
PRICKLE4	chr6:41856477-41865614	0
HSP90AB1	chr6:44322801-44329598	0
WASF1	chr6:110527714-110607900	0
LYPLA2	chr1:23990232-23994614	0
BRP44L	chr6:166698399-166716476	0
PHF10	chr6:169844181-169866026	0
C6orf70	chr6:169878919-169923605	0
HDAC9	chr7:18501893-19003518	0
STAG3	chr7:99613473-99707766	0
CUX1	chr7:101246011-101713969	0
PDGFA	chr7:503420-526459	0
OSBPL3	chr7:24802690-24986285	0
ADCYAP1R1	chr7:31058649-31113403	0
PDE1C	chr7:31757317-32305466	0
EGFR	chr7:55054218-55242524	0
FBXL13	chr7:102240915-102502453	0
LRRC17	chr7:102240915-102502453	0
NRCAM	chr7:107575317-107884062	0
FOXP2	chr7:113841564-114121063	0
EIF3B	chr7:2261166-2440740	0
WIPI2	chr7:5196360-5240012	0
UBXN11	chr1:26481359-26519600	0
H2AFV	chr7:44833012-44854255	0
RGS7	chr1:239005437-239587153	0
NSUN5P2	chr7:71987871-72063222	0
STEAP2	chr7:89678935-89708027	0
CCDC136	chr7:128218783-128249419	0
VPS13B	chr8:100094669-100958983	0
PTK2B	chr8:27224915-27372820	0
RIMS2	chr8:104582290-105333263	0
ADRA1A	chr8:26661583-26778839	0
FGFR1	chr8:38387812-38445509	0
ANK1	chr8:41629900-41873155	0
ASPH	chr8:62578373-62789672	0
BMP1	chr8:22078644-22125782	0
SCARA3	chr8:27547303-27590211	0
BAALC	chr8:104222096-104380152	0
NCDN	chr1:35795660-35804963	0
NPHP4	chr1:5845456-6083840	0
ADAMTSL1	chr9:18464097-18900948	0
ASTN2	chr9:118227327-119217138	0
NFIB	chr9:14071846-14388630	0
TLE4	chr9:81376507-81531478	0
WNK2	chr9:94987032-95148517	0
FAM120A	chr9:95248603-95368218	0
MIR3074	chr9:96528803-96889261	0
CDC14B	chr9:98298389-98421933	0
C9orf174	chr9:99040599-99179390	0
SLC44A1	chr9:107046723-107241273	0
C9orf25	chr9:34388181-34448568	0
PIGO	chr9:35078684-35086579	0
CCDC107	chr9:35648300-35659610	0
CAP1	chr1:40278491-40310908	0
NFYC	chr1:40929881-41009864	0
FAM120AOS	chr9:95248603-95368218	0
TRIM14	chr9:99858841-99921309	0
KIF1B	chr1:10193417-10364248	0
RC3H2	chr9:124646655-124707383	0
STXBP1	chr9:129414388-129494816	0
CIZ1	chr9:129968164-130057348	0
MASP2	chr1:11008648-11029883	0
TAF1	chrX:70502838-70668949	0
KIAA2022	chrX:73869408-74062045	0
ATP7A	chrX:77052849-77192208	0
KIAA2013	chr1:11749385-11909072	0
CLCN6	chr1:11749385-11909072	0
GRIPAP1	chrX:48715077-48743619	0
FAM58A	chrX:152506578-152517780	0
FLNA	chrX:153230090-153256188	0
BRCC3	chrX:153943090-154037972	0
PARD3	chr10:34438494-35144255	0
NT5C2	chr10:104837763-104943041	0
CACNB2	chr10:18469611-18870797	0
KIAA1217	chr10:24023680-24876778	0
ABI1	chr10:27026600-27189965	0
CDH23	chr10:72826696-73245708	0
PSAP	chr10:73246060-73281132	0
SLIT1	chr10:98747784-99042403	0
CRTAC1	chr10:99599985-99780575	0
CASP7	chr10:115428924-115480652	0
FGFR2	chr10:123223888-123347962	0
PDSS1	chr10:27026600-27189965	0
YME1L1	chr10:27439393-27483327	0
HNRNPH3	chr10:69712422-69772950	0
LRRC20	chr10:71728734-71812388	0
UBR4	chr1:19273586-19409333	0
NEXN	chr1:78126787-78217365	0
FUBP1	chr1:78126787-78217365	0
ARHGAP19	chr10:98747784-99042403	0
CARS	chr11:2978727-3035247	0
MICAL2	chr11:12088713-12241903	0
SLC3A2	chr11:62380093-62412928	0
NDUFC2	chr11:77457050-77468579	0
APLP2	chr11:129445010-129519910	0
BSCL2	chr11:62214322-62233562	0
MARK2	chr11:63363466-63433621	0
CASC1	chr12:25096507-25239361	0
ERC1	chr12:970664-1475360	0
EP400	chr12:131000460-131130958	0
TMTC1	chr12:29545023-29828959	0
LARP4	chr12:49080916-49160046	0
NAV3	chr12:76749199-77130921	0
NCOR2	chr12:123374913-123586102	0
KRAS	chr12:25249448-25295121	0
HDAC7	chr12:46462775-46499924	0
MARS	chr12:56140200-56200567	0
ST7L	chr1:112867665-113015764	0
DEPDC4	chr12:99117995-99184988	0
PHTF1	chr1:114036376-114103621	0
DACH1	chr13:70910098-71339331	0
UGGT2	chr13:95251838-95503638	0
FRY	chr13:31503436-31768776	0
DCLK1	chr13:35243477-35603443	0
SIKE1	chr1:115113622-115124829	0
COL4A2	chr13:109757614-109963375	0
HSPH1	chr13:30608764-30634117	0
CAB39L	chr13:48780789-48964298	0
SETDB2	chr13:48780789-48964298	0
NIN	chr14:50256230-50367597	0
TDP1	chr14:89491998-89580859	0
NDRG2	chr14:20554762-20563775	0
EPB41	chr1:29086214-29323008	0
FBLN5	chr14:91405510-91490499	0
TJP1	chr15:27778862-27901998	0
ZNF280D	chr15:54709670-54813576	0
DPP8	chr15:63525050-63597088	0
PCSK6	chr15:99661656-99847396	0
SERF2	chr15:41852106-41904243	0
NGRN	chr15:88609898-88616447	0
NFAT5	chr16:68156497-68296054	0
MKL2	chr16:14072696-14268130	0
SEMA6C	chr1:149370790-149385728	0
PYCARD	chr16:31084765-31144011	0
NDRG4	chr16:57055117-57105024	0
MYH10	chr17:8279903-8474804	0
CACNB1	chr17:34583234-34607428	0
BCAS3	chr17:56109997-56824973	0
EFCAB5	chr17:25292811-25537617	0
SPAG9	chr17:46397082-46553204	0
SDK2	chr17:68842117-69015332	0
CYTH1	chr17:74181724-74289974	0
NDEL1	chr17:8279903-8474804	0
TPM3	chr1:152394403-152431233	0
GSDMB	chr17:35314373-35328429	0
NME2	chr17:46585918-46604104	0
YY1AP1	chr1:153895857-153925415	0
CANT1	chr17:74499393-74517455	0
PYCR1	chr17:77483559-77488463	0
CCDC30	chr1:42701611-42892444	0
MEF2D	chr1:154700145-154737153	0
MBP	chr18:72819770-72973788	0
2002-03-01	chr19:7929457-8459885	0
PEG3	chr19:61977741-62043887	0
MKNK2	chr19:1988480-2002243	0
C19orf28	chr19:3441823-3723219	0
FBN3	chr19:7929457-8459885	0
KANK3	chr19:7929457-8459885	0
ANGPTL4	chr19:7929457-8459885	0
HNRNPM	chr19:7929457-8459885	0
GIPC1	chr19:14449571-14467944	0
PLD3	chr19:45546424-45576230	0
COPA	chr1:158525000-158595366	0
CLASRP	chr19:50234137-50266054	0
ERCC2	chr19:50535837-50565675	0
NR1I3	chr1:159462456-159475822	0
PTPRT	chr20:40134805-41252024	0
PABPC1L	chr20:42972116-43022528	0
SNAP25	chr20:10147476-10236065	0
ABHD12	chr20:25176705-25319477	0
NSFL1C	chr20:1370806-1396417	0
ENSG00000126005	chr20:33330138-33336008	0
RBM39	chr20:33754945-33793648	0
SRC	chr20:35407970-35467867	0
ATP1B1	chr1:167341558-167603810	0
KCNQ2	chr20:61507985-61574437	0
RTEL1	chr20:61759606-61800495	0
OPRL1	chr20:62181931-62215047	0
DYRK1A	chr21:37661748-37809550	0
ADARB1	chr21:45318195-45470903	0
DIP2A	chr21:46703239-46814049	0
MRAP	chr21:32585994-32687206	0
SETD4	chr21:36328708-36373557	0
UFD1L	chr22:17817700-17846726	0
AIFM3	chr22:19649433-19665649	0
OSBPL9	chr1:51800125-52026729	0
CCDC157	chr22:29057978-29102818	0
OSBP2	chr22:29420062-29633811	0
CACNA1I	chr22:38296703-38415688	0
BID	chr22:16596907-16637263	0
RGL4	chr22:22360328-22371363	0
SMARCB1	chr22:22459149-22511201	0
DERL3	chr22:22459149-22511201	0
C22orf13	chr22:23266409-23354972	0
HPS4	chr22:25177445-25209820	0
EWSR1	chr22:27994016-28026515	0
THOC5	chr22:28234156-28279736	0
LIMK2	chr22:29938249-30006066	0
TOM1	chr22:34025860-34073973	0
SYNGR1	chr22:38075899-38111537	0
BRD1	chr22:48552934-48607164	0
TNNT2	chr1:199594758-199613431	0
DAB1	chr1:57233038-58488763	0
KDM5B	chr1:200963155-201045186	0
CD46	chr1:205992024-206035481	0
GUK1	chr1:226394285-226403308	0
KMO	chr1:239762056-239870324	0
BRE	chr2:27966985-28415272	0
ANKRD36B	chr2:97475561-97572761	0
DTNB	chr2:25453615-25750007	0
VIT	chr2:36777410-36895433	0
LIMS1	chr2:108571198-108670134	0
BIN1	chr2:127522072-127581334	0
NEB	chr2:152050095-152299247	0
RBMS1	chr2:160838760-161058551	0
WIPF1	chr2:175132548-175255873	0
OSBPL6	chr2:178767453-178969119	0
TRIP12	chr2:230340173-230494912	0
GIGYF2	chr2:233270258-233433529	0
PASK	chr2:241694187-241771112	0
CGREF1	chr2:27163114-27195487	0
MCFD2	chr2:46982516-47156780	0
PPP3R1	chr2:68205962-68238150	0
PLGLB1	chr2:86988586-87102486	0
GPAT2	chr2:96051421-96064454	0
DYNC1I2	chr2:172252224-172313176	0
MOBKL3	chr2:198088549-198125750	0
MFF	chr2:227898198-227930793	0
COPS7B	chr2:232354624-232381679	0
KCNJ13	chr2:233270258-233433529	0
CAPN10	chr2:241174805-241219348	0
MTERFD2	chr2:241586927-241690420	0
ENSG00000179036,VAMP2	chr17:8003145-8007017	2.22e-16
GMEB1	chr1:28867830-28918452	3.33e-16
WSB1	chr17:22645232-22664772	3.33e-16
MAP4K4	chr2:101680919-101877583	3.33e-16
CCBL2,RBMXL1	chr1:89174043-89231224	6.66e-16
TJAP1	chr6:43553288-43582269	7.77e-16
ARGLU1	chr13:105992021-106018513	8.88e-16
SVIL	chr10:29786282-30064736	1.33e-15
GRIK5	chr19:47194316-47261797	2.78e-15
PPP6R3	chr11:67984774-68139373	4.44e-15
RBBP8	chr18:18767292-18860447	6.22e-15
TOM1L2	chr17:17687547-17816515	8.66e-15
LAMP2	chrX:119446366-119487189	1.05e-14
MEGF11	chr15:63974687-64333139	1.34e-14
AGTRAP	chr1:11718728-11733412	2.05e-14
ENSG00000204364	chr6:32003472-32027840	6.56e-14
NPHP1	chr2:110237194-110319908	7.03e-14
ENSG00000130731	chr16:624429-626348	7.33e-14
TAB3	chrX:30755479-30903122	1.59e-13
ATP2B4	chr1:201862311-201984201	1.66e-13
CUL2	chr10:35337484-35419576	2.16e-13
SRSF3	chr6:36670143-36679187	2.29e-13
CHGA	chr14:92459197-92471389	3.47e-13
CAPRIN1	chr11:34029805-34080733	3.91e-13
PLEKHA1	chr10:124124209-124181857	6.95e-13
NRXN2	chr11:64130221-64247236	7.9e-13
ATP5D	chr19:1192748-1195823	1.49e-12
PNPLA7	chr9:139474224-139564807	3.48e-12
KCNH6	chr17:58954426-59172947	5.18e-12
NTNG2	chr9:134027154-134109742	6.15e-12
MYO7A	chr11:76516957-76603932	6.53e-12
PLP1	chrX:102918409-102934201	9.32e-12
WHSC1L1	chr8:38251716-38358947	1e-11
HIVEP2	chr6:143114296-143308031	1.21e-11
CDC40	chr6:110608036-110786168	1.28e-11
SHC1	chr1:153201397-153213476	1.44e-11
ITSN2	chr2:24279236-24437087	1.75e-11
COLEC11	chr2:3620419-3669911	1.9e-11
NUMA1	chr11:71387234-71469221	2.08e-11
GTF3C5	chr9:134888453-134923709	3.14e-11
BCAS1	chr20:51991403-52120491	3.83e-11
GPM6B	chrX:13698982-13866758	4.62e-11
POLR1C	chr6:43592768-43691375	5.82e-11
ITM2C	chr2:231437556-231452206	7.72e-11
WDR67	chr8:124154100-124233571	9.59e-11
G6PD	chrX:153412799-153448998	1.02e-10
PNKD	chr2:218843358-218919756	1.21e-10
ZNF12	chr7:6694588-6713091	1.22e-10
C1orf159,ENSG00000215916	chr1:1007060-1041341	1.35e-10
ZNF615	chr19:57186399-57203275	1.67e-10
TMEM130	chr7:98282049-98305579	1.77e-10
BEX4	chrX:102356707-102358779	1.79e-10
PKD1	chr16:2037990-2125900	2.27e-10
KCNAB2	chr1:5845456-6083840	2.65e-10
TOMM7	chr7:22816535-22828989	3.2e-10
RPL14	chr3:40473833-40478862	3.21e-10
SDCCAG3	chr9:138416195-138424882	4.36e-10
DAAM1	chr14:58725151-58907876	5.69e-10
SLC4A3	chr2:220200359-220214946	5.98e-10
SCHIP1	chr3:160474303-161097816	6.69e-10
ANK3	chr10:61458164-61819494	1.04e-09
C21orf91	chr21:18083155-18113574	1.06e-09
SHANK2	chr11:69991608-70536020	1.21e-09
OBSL1	chr2:220123707-220144430	1.53e-09
ARHGAP32	chr11:128343051-128567303	1.56e-09
SRSF11	chr1:70443952-70592993	1.63e-09
ARHGAP33	chr19:40939937-41034579	2.21e-09
SNX25	chr4:186368277-186537146	2.3e-09
NRP2	chr2:206255468-206371099	2.99e-09
MAGED2	chrX:54850756-54859170	5.59e-09
NHP2	chr5:177509073-177513567	7.31e-09
UTY	chrY:13868957-14101944	8.19e-09
WASF3	chr13:26029839-26161080	8.31e-09
FLNB	chr3:57969166-58133018	1.39e-08
NBEA	chr13:34414455-35144873	1.6e-08
MYT1L	chr2:1771893-2314052	1.6e-08
LSM14B	chr20:60130911-60143829	1.67e-08
STMN4	chr8:27149737-27171843	1.86e-08
ACOT11	chr1:54786488-54873005	2.03e-08
ARVCF	chr22:18337420-18384309	2.55e-08
C10orf91	chr10:133995647-134112902	3.48e-08
GAS2L1	chr22:28032996-28038774	3.65e-08
PPFIA2	chr12:80177486-80672131	4.29e-08
RBM3	chrX:48272499-48321742	4.54e-08
EEF1B2	chr2:206732562-206735897	4.57e-08
SMARCA2	chr9:2005341-2183624	4.92e-08
CHID1	chr11:858395-900823	5.61e-08
GRIA3	chrX:122145686-122452447	6.22e-08
C20orf201	chr20:62181931-62215047	6.87e-08
APAF1	chr12:97563208-97653335	7.06e-08
EDF1	chr9:138876391-138880559	7.21e-08
MBD4	chr3:130632482-130641542	1.13e-07
C19orf29	chr19:3441823-3723219	1.18e-07
RAB3IP	chr12:68418897-68503251	1.18e-07
ERG	chr21:38673818-38955488	1.22e-07
C19orf26	chr19:1180177-1188990	1.4e-07
PBLD	chr10:69712422-69772950	1.41e-07
QRICH1	chr3:49042147-49270159	1.48e-07
ID1	chr20:29656752-29657974	1.57e-07
INO80E	chr16:29915059-29930243	1.74e-07
CPNE1	chr20:33677379-33716262	1.8e-07
RNH1	chr11:484512-497273	1.83e-07
CPEB4	chr5:173248794-173319916	1.83e-07
PAQR4	chr16:2959342-2970506	1.93e-07
SLC7A2	chr8:17398974-17472357	1.94e-07
RUFY1	chr5:178910164-178969633	2.09e-07
ACP1	chr2:254895-268278	2.38e-07
PPP1R3F	chrX:49013260-49031501	2.39e-07
BCAN	chr1:154878356-154895939	2.43e-07
PHF7	chr3:52419566-52432696	2.6e-07
DMWD	chr19:50978103-50987900	3.29e-07
C1orf103	chr1:111291335-111308089	3.42e-07
ACACA	chr17:32516035-32841015	3.54e-07
RALGPS2	chr1:176960922-177153766	3.9e-07
KSR1	chr17:22807796-22974545	4.48e-07
BAIAP2	chr17:76623545-76754467	4.65e-07
ERP29	chr12:110935534-110945407	4.79e-07
CTNNAL1	chr9:110736281-110815600	4.96e-07
APP	chr21:26174732-26465003	5.47e-07
FTCD	chr21:46380603-46399909	5.49e-07
PTPRF	chr1:43769133-43861930	5.63e-07
NELF	chr9:139461842-139473592	5.65e-07
AIMP1	chr4:107186688-107489831	5.89e-07
TCFL5	chr20:60918858-60963560	7.07e-07
C22orf40	chr22:45018571-45024857	7.5e-07
GPR137	chr11:63809906-63813539	7.84e-07
NDUFV3	chr21:43186446-43202841	7.85e-07
RORA	chr15:58576754-59308709	7.86e-07
PCDHA9	chr5:140154627-140372113	7.92e-07
NCSTN	chr1:158525000-158595366	1.03e-06
ZFYVE27	chr10:99486869-99510642	1.04e-06
KLC1	chr14:103165277-103251536	1.07e-06
TNRC18	chr7:5312951-5431571	1.08e-06
STOM	chr9:123141177-123172366	1.15e-06
ARHGAP9	chr12:56140200-56200567	1.23e-06
ATG3	chr3:113734049-113763453	1.31e-06
SLC25A23	chr19:6387092-6410781	1.32e-06
ARID4A	chr14:57834974-57910201	1.33e-06
VWA3A	chr16:22011362-22075775	1.37e-06
WHSC1	chr4:1842920-1953732	1.37e-06
AP3D1	chr19:2051992-2102556	1.4e-06
CAMK2B	chr7:44223279-44331749	1.55e-06
ENSG00000115934	chr2:201443924-201462271	1.7e-06
DNAJC2	chr7:102725108-102772556	1.71e-06
SLC8A2	chr19:52623734-52666934	1.71e-06
DNAH2	chr17:7562745-7677783	1.72e-06
ADAM33	chr20:3596616-3610893	1.88e-06
WDR16	chr17:9420668-9487497	1.89e-06
PPA2	chr4:106509683-106614676	2.09e-06
QKI	chr6:163755664-163914886	2.15e-06
KIAA1598	chr10:118599012-118754866	2.16e-06
SLC9A6	chrX:134895251-134957092	2.55e-06
SPTBN4	chr19:45664965-45774204	2.66e-06
MTSS1L	chr16:69252607-69277455	2.71e-06
ARHGAP21	chr10:24912550-25052550	2.74e-06
TNNT1	chr19:60336007-60352385	2.77e-06
ZNF438	chr10:31173568-31360860	3.01e-06
TMEM201	chr1:9571563-9595728	3.27e-06
ENSG00000206503	chr6:30017015-30021640	3.32e-06
SDF4	chr1:1142176-1157274	3.35e-06
CASP9	chr1:15675182-15723527	3.37e-06
GRIK1	chr21:29831124-30234211	3.43e-06
SLTM	chr15:56958536-57013144	3.44e-06
C16orf70	chr16:65701415-65739941	3.5e-06
ANXA6	chr5:150460460-150517565	3.72e-06
KHK	chr2:27163114-27195487	3.76e-06
SLK	chr10:105716982-105777332	3.9e-06
ZFAND2A	chr7:1158232-1166340	3.97e-06
LGR4	chr11:27344083-27450910	4.12e-06
ENSG00000203876	chr10:111691018-111885310	4.21e-06
CABP1	chr12:119562804-119589508	4.42e-06
TRIM9	chr14:50511737-50632529	4.46e-06
CNOT4	chr7:134697089-134845391	4.54e-06
PLEKHM2	chr1:15883413-15933849	4.74e-06
ARHGAP4	chrX:152826014-152844908	4.83e-06
ENSG00000214234,ENSG00000214238	chr16:88566488-88594696	4.94e-06
2008-09-01	chr5:132111035-132140966	5.16e-06
CAP2	chr6:17501714-17666000	5.2e-06
PIK3R3	chr1:46278398-46371053	5.57e-06
FAM193A	chr4:2596956-2704097	5.73e-06
RLTPR	chr16:66236530-66251882	5.75e-06
C11orf67	chr11:77209848-77265745	6.13e-06
EIF4ENIF1	chr22:30165352-30222094	6.28e-06
KCNK7	chr11:65100084-65174965	6.42e-06
TAGLN3	chr3:113200275-113215424	7.51e-06
IL18BP	chr11:71387234-71469221	7.56e-06
AFF2	chrX:147389830-147889899	8.2e-06
TXNDC6	chr3:139388837-139530895	8.36e-06
ZNF618	chr9:115678379-115858692	1.22e-05
NPLOC4	chr17:77134358-77226781	1.44e-05
BRWD1	chr21:39479273-39607426	1.45e-05
TCP1	chr6:160103042-160130725	1.45e-05
CTSA	chr20:43950673-43974226	1.6e-05
PAM	chr5:102229421-102394708	1.65e-05
TACC2	chr10:123738698-124004049	1.69e-05
RCCD1	chr15:89299109-89307357	1.71e-05
C1orf86	chr1:1971768-2122397	1.76e-05
BTBD1	chr15:81476188-81527110	1.83e-05
SRSF7	chr2:38824246-38832005	1.94e-05
PDE4DIP	chr1:143562783-143787552	1.96e-05
CD99L2	chrX:149685469-149817837	2.12e-05
BCCIP	chr10:127502104-127559874	2.14e-05
NDUFS7	chr19:1334905-1346583	2.25e-05
DGUOK	chr2:74007460-74039596	2.29e-05
TSC2	chr16:2037990-2125900	2.29e-05
CLN3	chr16:28396100-28411124	2.31e-05
CAMK2A	chr5:149579246-149650047	2.5e-05
PSMD10	chrX:107214092-107221504	2.54e-05
STK35	chr20:2030726-2105679	2.55e-05
WBP5	chrX:102498035-102500035	2.56e-05
SURF4	chr9:135204889-135232791	2.8e-05
MCF2	chrX:138491595-138601950	2.91e-05
BTBD9	chr6:38250712-38673848	2.95e-05
ZMAT4	chr8:40507269-40874500	2.99e-05
TAF8	chr6:42126228-42163170	2.99e-05
FAM108B1	chr9:73667187-73715968	3.51e-05
GLYR1	chr16:4793207-4837294	3.61e-05
KIAA1468	chr18:58005503-58125334	3.63e-05
C20orf7	chr20:13713681-13745872	3.8e-05
NR6A1	chr9:126319379-126573410	3.84e-05
ZNF155	chr19:49180194-49194317	3.86e-05
ENSG00000141837	chr19:13178255-13478038	3.86e-05
MRPS36	chr5:68549328-68609004	3.92e-05
PDCD7	chr15:63196770-63213227	4.28e-05
COPS8	chr2:237658822-237672226	4.29e-05
TXNDC11	chr16:11669801-11744149	4.32e-05
ZNF250	chr8:146076624-146097620	4.46e-05
NAB2	chr12:55768943-55791428	4.72e-05
C9orf93	chr9:15543004-15964031	5.03e-05
PLXNA4	chr7:131465777-131911863	5.14e-05
MAP3K3	chr17:58954426-59172947	5.19e-05
SLC2A11	chr22:22521911-22561170	5.25e-05
OLFM1	chr9:137106909-137152851	5.31e-05
ACOX1	chr17:71449190-71513675	5.59e-05
IMPDH1	chr7:127819567-127837272	5.77e-05
MTMR2	chr11:95205693-95296920	6.1e-05
MTCH1	chr6:37043895-37167595	6.15e-05
CASP3	chr4:185785843-185807623	6.2e-05
PCDHA2	chr5:140154627-140372113	6.52e-05
TTC18	chr10:74683525-74789458	6.96e-05
RERE	chr1:8335052-8800286	7.02e-05
DLEC1	chr3:38055699-38153619	7.05e-05
OSBPL8	chr12:75269719-75477720	7.08e-05
AKT2	chr19:45428063-45483105	7.1e-05
TRPM3	chr9:72339768-73251640	7.33e-05
DCX	chrX:110423662-110542259	7.42e-05
ZDHHC8P1	chr22:22062791-22074799	7.55e-05
ABCA3	chr16:2265879-2330748	7.56e-05
ABCC8	chr11:17371007-17455025	7.59e-05
RPS27	chr1:152229861-152231245	7.72e-05
FAM184A	chr6:119322696-119512057	7.86e-05
RBM42	chr19:40811819-40820426	8.02e-05
CADPS	chr3:62359061-62836094	8.22e-05
RFFL	chr17:30360243-30440407	8.64e-05
CTTN	chr11:69922291-69960337	8.78e-05
VSTM2A	chr7:54577511-54606267	9.16e-05
TPRA1	chr3:128774619-128792302	9.18e-05
HIPK3	chr11:33235743-33332515	9.27e-05
CCDC90A	chr6:13898999-13922768	9.47e-05
AIF1L	chr9:132961732-133098909	9.6e-05
ASPN	chr9:94128042-94472368	9.82e-05
ATG7	chr3:11289082-11571556	9.84e-05
TBX1	chr22:18124225-18222462	0.000101
ZC3H13	chr13:45426600-45524895	0.000103
WAC	chr10:28861705-28949703	0.000108
RPS6KA2	chr6:166742843-167195648	0.000108
AP1G2	chr14:23095070-23117849	0.00011
CASK	chrX:41263407-41667660	0.00011
FARP1	chr13:97593434-97900017	0.000117
ANKRD44	chr2:197566546-197883756	0.000121
MARK3	chr14:102921523-103039917	0.000122
GLT8D1	chr3:52694975-52717249	0.000122
POLD1	chr19:55579419-55613082	0.000126
HMGCL	chr1:24000954-24025264	0.000129
PRDX5	chr11:63824438-63845858	0.00013
CCDC34	chr11:27316636-27341428	0.000131
PDDC1	chr11:757224-767487	0.000131
LRP11	chr6:150181626-150227173	0.000132
SMARCC2	chr12:54843033-54869618	0.000133
DHX34	chr19:52544385-52577795	0.000137
GRINL1A	chr15:55671405-55815085	0.000138
MYBBP1A	chr17:4348881-4405430	0.00014
LGTN	chr1:204831599-204852527	0.000141
SHROOM4	chrX:50351386-50573784	0.000143
GRIA1	chr5:152850498-153171354	0.00015
RPAIN	chr17:5230145-5283195	0.000164
DTNBP1	chr6:15631019-15771250	0.000168
MTUS1	chr8:17478442-17702666	0.000172
ARHGEF40	chr14:20608366-20627876	0.000174
PCCA	chr13:99539337-100039047	0.000179
NPR2	chr9:35782150-35802259	0.000181
PRKACB	chr1:84316328-84476765	0.000183
PRTFDC1	chr10:25177559-25281539	0.000185
ZNF692	chr1:247110827-247119907	0.000187
CASC4	chr15:42368220-42495247	0.000191
SEC23B	chr20:18436187-18490059	0.000194
MKNK1	chr1:46795676-46842497	0.000197
RSPH9	chr6:43720771-43763506	0.000198
BCL2L11	chr2:111594961-111642493	0.000206
CIT	chr12:118607980-118799475	0.000207
MGEA5	chr10:103534198-103568165	0.000207
MLLT10	chr10:21863107-22072560	0.000207
SNX3	chr6:108639410-108689156	0.000213
MANBAL	chr20:35351464-35379077	0.000214
BRPF3	chr6:36272527-36308544	0.000215
CDC42BPA	chr1:225244189-225572449	0.000219
SH3GL2	chr9:17569193-17787118	0.000224
MAPK10	chr4:87156654-87593320	0.000232
BCKDHB	chr6:80873082-81112706	0.000235
KCNT2	chr1:194461535-194844122	0.000251
HGSNAT	chr8:43114748-43177126	0.000252
C20orf112	chr20:30498329-30660356	0.000254
ENOX2	chrX:129585030-129864889	0.000259
SNRNP200	chr2:96303803-96334988	0.00026
EED	chr11:85633462-85667426	0.000265
NFIL3	chr9:93211147-93225965	0.000271
CTNND2	chr5:11024977-11957110	0.000277
ATP13A2	chr1:17185039-17211010	0.000297
CSPG5	chr3:47578740-47597286	0.000299
STAMBPL1	chr10:90629994-90723050	0.000314
RCHY1	chr4:76623380-76658652	0.000328
AMPD2	chr1:109963981-109976198	0.00033
PTK2	chr8:141737682-142080514	0.000341
ASS1	chr9:132309914-132366482	0.000343
TMEM85	chr15:32304531-32417557	0.000357
ARHGEF7	chr13:110565782-110756079	0.000357
ENSG00000221889	chr19:41191861-41196981	0.000367
PLCB3	chr11:63775617-63791970	0.000377
HNRNPC	chr14:20747134-20807478	0.000385
STYXL1	chr7:75463591-75515257	0.00039
C20orf132	chr20:35163042-35303434	0.000391
NSMCE4A	chr10:123706600-123724722	0.000398
TCF7L2	chr10:114700200-114916073	0.000402
CSNK1E,ENSG00000100181	chr22:37016643-37124473	0.000403
DHX30	chr3:47819654-47866686	0.000403
C19orf63	chr19:55627971-55678419	0.000405
MT1G	chr16:55258153-55259478	0.000413
N6AMT1	chr21:29166383-29179564	0.000415
ENSG00000188463,ENSG00000214605	chr7:71677438-71936739	0.000424
SERHL2	chr22:41279868-41307988	0.000425
MRPL43	chr10:102722275-102737262	0.000439
RHBDL2	chr1:39124064-39180043	0.000452
ME3	chr11:85829797-86061075	0.000469
BCR	chr22:21852551-21990224	0.000487
GOLGA4	chr3:37259554-37383240	0.000489
TMEM54	chr1:33124684-33149272	0.00049
RBPJ	chr4:25930429-26045851	0.000494
PQLC2	chr1:19511326-19528380	0.000498
NOL4	chr18:29685061-30057513	0.000503
C14orf159	chr14:90650109-90761456	0.000509
PILRA	chr7:99809003-99835650	0.00051
U2AF1	chr21:43386135-43400757	0.000516
BCORL1	chrX:128944349-129019254	0.000531
AZIN1	chr8:103907711-103945573	0.00054
GREB1L	chr18:17076316-17342618	0.000541
SSH2	chr17:24977090-25281144	0.000555
C1GALT1C1	chrX:119643563-119647969	0.000561
THBS1	chr15:37660571-37862331	0.000579
EMD	chrX:153260916-153263075	0.000588
HDDC2	chr6:125638194-125664981	0.000597
EXT2	chr11:44073674-44223555	0.000598
SPIRE2	chr16:88422407-88465228	0.000602
EYA3	chr1:28169444-28287702	0.000602
KIAA1328	chr18:32630032-33059285	0.000616
SLC24A1	chr15:63703471-63735652	0.000624
PBXIP1	chr1:153183175-153195221	0.000627
RFX3	chr9:3214648-3515983	0.00063
C1orf91	chr1:32447281-32460536	0.00063
MZF1	chr19:63765096-63776754	0.000646
GNPAT	chr1:229443582-229480153	0.000651
MRPL35	chr2:86280090-86294372	0.000663
APH1A	chr1:148496792-148519951	0.000671
ERBB2IP	chr5:65258157-65412606	0.000673
EPB49	chr8:21971321-21995982	0.000679
INSIG1	chr7:154720475-154732877	0.00068
COPE	chr19:18871322-18891199	0.000683
PIGQ	chr16:550422-574109	0.000693
RNF170	chr8:42825090-42870939	0.000705
MAX	chr14:64523259-64638980	0.000714
GAPVD1	chr9:127063928-127169307	0.000718
CDHR3	chr7:105390920-105461133	0.000723
THSD1	chr13:51833079-51878321	0.000724
CDK10	chr16:88280576-88290260	0.000724
HNRNPUL1	chr19:46460263-46505438	0.000731
RNF40	chr16:30681099-30695129	0.000735
GIT2	chr12:108851991-108918483	0.000736
RPN2	chr20:35163042-35303434	0.00074
SNAPC3	chr9:15412731-15500989	0.000763
TMEM53	chr1:44643452-44912702	0.000764
NEK10	chr3:27127398-27385916	0.000769
APTX	chr9:32962608-32991626	0.0008
CSPP1	chr8:68139156-68271048	0.000836
COL4A5	chrX:107569809-107827431	0.000848
NAPB	chr20:23290818-23350081	0.000857
SMAP1	chr6:71434199-71723462	0.000857
MOV10L1	chr22:48870609-48942246	0.00086
STOML1	chr15:72062613-72071688	0.000878
GLRX3	chr10:131824652-131868630	0.000879
ATL1	chr14:50096579-50169508	0.000882
PNCK	chrX:152588378-152592974	0.000902
FMR1	chrX:146801172-146840303	0.000908
ZNF16	chr8:146126549-146147078	0.000917
C6orf108	chr6:43301346-43305189	0.000942
ANKRD16	chr10:5943696-5971807	0.000942
MINK1	chr17:4728436-4747148	0.000996
2010-09-01	chr2:109657668-109729072	0.000998
PIGC	chr1:170077260-170704590	0.001004
FBF1	chr17:71417581-71448714	0.001005
RIT2	chr18:38577190-38949655	0.001012
ADAM15	chr1:153290385-153301876	0.001017
ATXN2L	chr16:28741914-28756057	0.00102
MRPL4	chr19:10223639-10231736	0.00104
USF2	chr19:40451735-40462558	0.001053
TFDP2	chr3:143154013-143350992	0.001101
NR2C2	chr3:14964094-15081820	0.001123
FERMT3	chr11:63730781-63750257	0.001137
ACAA1	chr3:38055699-38153619	0.001143
FBXO21	chr12:116065968-116112683	0.001147
ZNF37A	chr10:38423280-38452282	0.001151
PHF20L1	chr8:133856785-133930234	0.001156
POLE4	chr2:75039282-75050366	0.001172
TIMM23	chr10:51262095-51293344	0.001172
CACNA1G	chr17:45993819-46059541	0.001189
DUSP6	chr12:88265969-88270427	0.001206
C1orf54	chr1:148496792-148519951	0.001213
ANXA8L1	chr10:46511544-46679689	0.001231
PCYT1B	chrX:24486124-24600715	0.001232
FPGS	chr9:129604974-129616377	0.001256
SNX13	chr7:17798180-17946642	0.001344
FBLN2	chr3:13565624-13654922	0.001353
ATG4B	chr2:242172492-242261945	0.001473
CMTM4	chr16:65206154-65288111	0.001474
TRMT1	chr19:13076720-13088563	0.001501
ENSG00000205804	chr13:24405456-24440610	0.001508
NKIRAS2	chr17:37372284-37459533	0.001515
PPAP2B	chr1:56733022-56817845	0.001533
ENSG00000068831	chr11:64250958-64269504	0.001567
S100A1	chr1:151857898-151885402	0.001569
CHRFAM7A	chr15:28440734-28473156	0.001588
FGGY	chr1:59535327-60000988	0.001595
FAM165B	chr21:34669618-34696945	0.001605
TRAF3	chr14:102313568-102442381	0.001635
GALNT14	chr2:30986837-31215096	0.001645
FILIP1	chr6:76062345-76260216	0.001682
NAP1L1	chr12:74726226-74764717	0.001704
KIAA0319L	chr1:35671678-35795591	0.001737
SEZ6L	chr22:24895439-25108010	0.001749
RAD51L3	chr17:30450928-30470948	0.001752
MTM1	chrX:149487726-149592453	0.001755
EPN2	chr17:19081282-19180621	0.001764
AACS	chr12:124115877-124193824	0.001775
AKAP11	chr13:41744288-41795402	0.001775
ICA1	chr7:8119338-8268767	0.001795
CTAGE5	chr14:38804226-38925907	0.001855
ANKRD13C	chr1:70443952-70592993	0.001868
SCN8A	chr12:50364209-50488564	0.00187
RAGE	chr14:101762374-101841284	0.001881
DPM1	chr20:48984810-49008499	0.001912
ERBB4	chr2:211948690-213111810	0.001937
FBXO44	chr1:11631032-11645971	0.001945
ATP5C1	chr10:7870098-7889764	0.001971
EXOG	chr3:38512859-38558441	0.001983
SYTL2	chr11:85082914-85146692	0.001985
PNLDC1	chr6:160141290-160161725	0.001989
PTPN2	chr18:12775484-12874334	0.002009
DNM3	chr1:170077260-170704590	0.002011
BZRAP1	chr17:53733596-53760477	0.002011
EPB41L2	chr6:131202179-131426017	0.002023
TANK	chr2:161701711-161800978	0.002071
KLHL4	chrX:86659424-86811706	0.002085
ACOT8	chr20:43895876-43919442	0.002103
ARPP21	chr3:35658852-35810992	0.002114
KIF21B	chr1:199205142-199259451	0.002258
RASGRF1	chr15:77041340-77169895	0.002312
C12orf10	chr12:51979777-51987221	0.002362
LRRC3B	chr3:26639300-26727271	0.002371
METT11D1	chr14:20527804-20535032	0.002385
MYH14	chr19:55398696-55505611	0.002389
INTS6	chr13:50813216-50925276	0.002403
DIAPH1	chr5:140874766-140978806	0.002417
EVI5	chr1:92746840-93030549	0.002428
C13orf18	chr13:45814139-45910326	0.002431
MAP3K7	chr6:91282073-91353628	0.002434
MEAF6	chr1:37724501-37752962	0.00244
ENSG00000168383	chr6:33140323-33173050	0.00244
CLIP2	chr7:73341738-73458196	0.002456
EPC2	chr2:149119037-149261600	0.002492
SMARCA4	chr19:10932605-11033953	0.002516
MED25	chr19:55013357-55033848	0.002526
MCM4	chr8:49036046-49052621	0.002543
TMEM129	chr4:1687477-1692882	0.002544
FMNL1	chr17:40655074-40680464	0.00256
PFDN5	chr12:51975501-51979497	0.002571
DCAF5	chr14:68587394-68689502	0.002621
CDC25A	chr3:48173673-48204805	0.002631
OTOF	chr2:26533574-26635070	0.002634
FZR1	chr19:3441823-3723219	0.002682
FAM189B	chr1:153483620-153491898	0.002701
KDM2B	chr12:120351284-120503272	0.002714
SH3PXD2A	chr10:105343775-105605154	0.002723
AVL9	chr7:32501662-33068934	0.002725
METTL1	chr12:56448634-56452208	0.002732
PICALM	chr11:85346378-85457787	0.002745
EXOC4	chr7:132588362-133401051	0.002775
PAK4	chr19:44308259-44361886	0.00283
PBX3	chr9:127548371-127769477	0.002922
CDK5RAP1	chr20:31410307-31452998	0.002955
RFWD2	chr1:174180589-174442993	0.002959
SLC4A5	chr2:74296877-74424044	0.002969
SUMF2	chr7:56099410-56128121	0.002977
GSTO1	chr10:106004650-106017201	0.003017
OPA3	chr19:50722866-50779962	0.003049
ATF6B	chr6:32191018-32204008	0.003062
MDP1	chr14:23748626-23755081	0.003062
SMG7	chr1:181708256-181789948	0.003074
PIP4K2A	chr10:22863771-23043509	0.003105
SETDB1	chr1:149165511-149203837	0.003138
RABGEF1	chr7:65843077-65913881	0.003153
HTRA2	chr2:74607283-74638181	0.003159
ELMO2	chr20:44428095-44468678	0.003165
SPP1	chr4:89115825-89123586	0.003181
SVEP1	chr9:112167351-112381981	0.003237
COASY	chr17:37967617-37971821	0.003258
MLL3	chr7:151462946-151764023	0.003266
CMTM5	chr14:22915856-22918820	0.003325
PRPF40B	chr12:48303669-48387464	0.003382
HCFC1	chrX:152866203-152890013	0.003394
SDHC	chr1:159550789-159604288	0.003426
COMMD3	chr10:22645304-22649243	0.003434
MYO3B	chr2:170742900-171260130	0.003454
ZNF41	chrX:47191351-47227289	0.00355
RPRD1A	chr18:31823784-31901491	0.003567
PARP6	chr15:70320576-70350682	0.003587
SGIP1	chr1:66771653-66986570	0.003624
FTSJD2	chr6:37508990-37558282	0.003633
ZNF655	chr7:98993980-99012008	0.003639
AIFM1	chrX:129091017-129127489	0.003643
NEDD4L	chr18:53862777-54216369	0.003643
ZMYND11	chr10:170642-290577	0.003662
COL4A3	chr2:227737524-227887752	0.003662
CHKB,CPT1B	chr22:49354155-49368260	0.003675
VPS16	chr20:2763959-2967320	0.003686
TWF1	chr12:42473794-42486445	0.003701
DENND5B	chr12:31426423-31635219	0.00375
DNAJB12	chr10:73762593-73784875	0.003834
PTPRU	chr1:29435633-29525900	0.003851
ELK4	chr1:203851859-203868623	0.003902
COL6A2	chr21:46342460-46377189	0.003909
ZNF76	chr6:35335426-35371740	0.003924
SMC2	chr9:105896361-105943519	0.003924
PPM1A	chr14:59782222-59829813	0.003927
APC2	chr19:1401147-1424243	0.003947
NLRP2	chr19:60169578-60204313	0.003956
MLLT4	chr6:167970519-168115552	0.00396
COBL	chr7:51051403-51351990	0.003968
PCID2	chr13:112879891-112911026	0.003993
NLRC3	chr16:3529038-3567402	0.004013
DNM1	chr9:129968164-130057348	0.004065
GHR	chr5:42459782-42757682	0.004073
TNFSF13	chr17:7393098-7426152	0.004077
CELF1	chr11:47446521-47531264	0.004126
GNB1	chr1:1706589-1812355	0.004239
TFAM	chr10:59815181-59830161	0.004281
PIN4	chrX:71318250-71334919	0.004375
SPEF1	chr20:3706151-3710102	0.004385
CLTA	chr9:36180891-36202055	0.004397
HDAC10	chr22:49025741-49031941	0.00442
MFSD2A	chr1:40193406-40208214	0.004469
SUPT6H	chr17:24013428-24053375	0.004537
ZNF236	chr18:72665103-72811668	0.004548
EXOC7	chr17:71586903-71611451	0.004561
CLTB	chr5:175752061-175776146	0.004661
C18orf45	chr18:19129974-19271923	0.004666
TMPO	chr12:97433535-97467028	0.004677
EXD3	chr9:139321168-139437535	0.004724
AGPAT4	chr6:161332748-161615097	0.004747
EPS15	chr1:51592522-51757583	0.004844
RIC3	chr11:8087071-8147148	0.004901
PGC	chr6:41759693-41823099	0.004939
HMGN5	chrX:80255855-80344097	0.00494
VAMP7	chrX:154764206-154826614	0.004975
P2RX7	chr12:120055060-120108239	0.005001
FAM76B	chr11:95141764-95162429	0.005019
ABTB1	chr3:128830728-128882452	0.005024
ANKDD1A	chr15:62991153-63038092	0.005059
UCK1	chr9:133368109-133396476	0.005075
TADA3	chr3:9796657-9853037	0.005079
LAYN	chr11:110916442-110936998	0.00509
TRPM6	chr9:76527230-76692830	0.005153
PRDM15	chr21:42091453-42172660	0.005178
FAM21A	chr10:51497689-51563272	0.005222
C17orf28	chr17:70458434-70480424	0.0053
BCAP29	chr7:107007945-107058401	0.005315
ACCN3	chr7:150376779-150380773	0.005324
PUM1	chr1:31176939-31311350	0.00534
RUNDC3B	chr7:86970883-87297691	0.005345
ARMC10	chr7:102502563-102527432	0.005398
C5orf45	chr5:179180502-179218446	0.00542
ALKBH3	chr11:43858970-43898389	0.005462
CLK1	chr2:201416153-201437667	0.005489
ENSG00000204576	chr6:30621674-30640159	0.005541
GLOD4	chr17:609441-642488	0.005561
EFR3B	chr2:25118502-25231747	0.005635
SIGIRR	chr11:395715-407397	0.005651
EPB41L4A	chr5:111507432-111782909	0.005653
CLYBL	chr13:99056923-99342825	0.00568
TMEM222	chr1:27521275-27535477	0.005689
DIDO1	chr20:60979534-61039719	0.005704
ZSCAN30	chr18:31075016-31124170	0.005724
CSMD1	chr8:2780281-3258996	0.005752
FASTK	chr7:150404640-150408884	0.005842
DDX31	chr9:134458204-134555292	0.005919
AP4S1	chr14:30434171-30631992	0.005927
DYNC1I1	chr7:95239801-95565671	0.005933
C1orf25	chr1:183353836-183392661	0.005959
DGKZ	chr11:46311030-46358677	0.005996
PTPMT1	chr11:47543750-47549942	0.006121
EIF4G2	chr11:10775168-10787158	0.006147
PSME1	chr14:23675217-23680637	0.006197
LMAN2L	chr2:96735395-96769528	0.006203
IDS	chrX:148368205-148394714	0.006222
KALRN	chr3:125296274-125922726	0.006261
MTMR14	chr3:9666143-9719076	0.006304
PLCXD3	chr5:41342804-41546487	0.006337
TUFT1	chr1:149779404-149822683	0.006415
TRAF3IP1	chr2:238893820-238974202	0.006434
LTBP3	chr11:65062865-65082275	0.006458
AGL	chr1:100088227-100162167	0.006494
CASP2	chr7:142695523-142714906	0.006686
AP2A1	chr19:54961991-55008339	0.006719
C19orf30	chr19:4720151-4723531	0.006733
C1orf93	chr1:2508096-2554289	0.006746
SPTAN1	chr9:130354686-130458950	0.006757
PPP3CB	chr10:74866569-74925765	0.006854
RDX	chr11:109571495-109672647	0.006882
ZNF385A	chr12:53049185-53071332	0.006936
ABI2	chr2:203901247-204005134	0.006957
C13orf18,ENSG00000215471	chr13:45814139-45910326	0.006958
FHAD1	chr1:15435807-15597210	0.007003
AMPH	chr7:38389831-38637545	0.00706
SKP2	chr5:36187945-36219902	0.00706
C9orf68	chr9:4578826-4656428	0.007108
NCOA6	chr20:32766238-32877094	0.00723
HEPACAM	chr11:124294357-124311518	0.007441
IRF2BP2	chr1:232806637-232811894	0.007442
RTN4RL2	chr11:56984892-57001005	0.007469
NID2	chr14:51541270-51606295	0.007494
C21orf33	chr21:44377921-44390033	0.007538
CCBL2	chr1:89174043-89231224	0.007577
FAM13C	chr10:60606352-60792358	0.007627
TPK1	chr7:143779975-144164079	0.007697
CEP120	chr5:122708477-122787151	0.007782
OLA1	chr2:174645420-174821611	0.007876
FLCN	chr17:17056253-17081227	0.007878
UPK3BL	chr7:101907432-102107091	0.007893
WDSUB1	chr2:159800557-159851482	0.007897
AATK	chr17:76623545-76754467	0.007902
NARFL	chr16:716958-737296	0.007964
C9orf5	chr9:110817237-110922046	0.007972
SIRT6	chr19:4125105-4133596	0.008094
WARS	chr14:99869877-99912433	0.008101
CDKN2A	chr9:21792634-22019516	0.008127
RWDD1	chr6:116999275-117021125	0.008136
GRIA4	chr11:104986009-105358029	0.008191
TSPAN4	chr11:832811-857116	0.008196
ANKRD42	chr11:82582938-82644690	0.008224
VPS24	chr2:86584063-86855943	0.008227
PHTF2	chr7:77266057-77424477	0.008396
CTU2	chr16:87300391-87330317	0.008459
CTBP1	chr4:1195227-1232908	0.00847
STAU1	chr20:47163284-47238311	0.008526
MED16	chr19:818963-844218	0.008608
TIPRL	chr1:166414794-166437976	0.008723
ABCB8	chr7:150356481-150373582	0.008734
USP9X	chrX:40829831-40980776	0.008755
ARHGEF6	chrX:135575371-135691169	0.008797
MEIS2	chr15:34970518-35189740	0.008827
PDLIM2	chr8:22492587-22511483	0.00889
AJAP1	chr1:4614964-4743711	0.008918
C16orf89	chr16:5034124-5056112	0.008963
EIF4G3	chr1:21005558-21375927	0.009043
S100PBP	chr1:33013426-33097062	0.009085
KIAA1191	chr5:175705673-175721415	0.009136
DIS3L2	chr2:232534536-232916529	0.009217
ANKLE2	chr12:131812327-131848524	0.00926
EXOC6	chr10:94584449-94809241	0.009267
THEM4	chr1:150112683-150148737	0.009294
CEP250	chr20:33506563-33563218	0.009315
SERPINA3	chr14:94148386-94160150	0.009336
SATB2	chr2:199842475-200038076	0.009374
PIP4K2B	chr17:34175469-34209684	0.009428
TTLL1	chr22:41765588-41815378	0.009468
ZDHHC13	chr11:19095267-19154542	0.009536
C7orf50	chr7:1003167-1144419	0.009645
EPN1	chr19:60878403-60898944	0.009677
UBP1	chr3:33404834-33456874	0.009678
SLIT2	chr4:19864332-20229886	0.009798
LMO7	chr13:75092570-75343063	0.009971
CSGALNACT1	chr8:19305951-19584374	0.009982
MEGF8	chr19:47521600-47574761	0.010008
ENPP2	chr8:120638499-120720287	0.010107
RELA	chr11:65177648-65186959	0.010118
UFM1	chr13:37821987-37835137	0.010169
PPP3CC	chr8:22354540-22454580	0.010178
DHPS	chr19:12641516-12653682	0.010245
GANAB	chr11:62148875-62170680	0.010293
HYDIN2	chr16:69398792-69822070	0.010377
PABPC4	chr1:39799074-39815049	0.010387
MYEF2	chr15:46200460-46257850	0.010402
JMJD7-PLA2G4B	chr15:39907580-39927628	0.010422
MTX1	chr1:153445113-153463837	0.010428
PARL	chr3:185029869-185085387	0.010508
GOLGA5	chr14:92330402-92376057	0.010511
CXADR	chr21:17807200-17887768	0.010536
KAT5	chr11:65236064-65244985	0.010544
TBC1D8	chr2:100985122-101134278	0.010881
WWC1	chr5:167651669-167829334	0.010917
NAB1	chr2:191222040-191265734	0.010976
NFATC3	chr16:66676875-66818301	0.01098
LOH12CR1	chr12:12401321-12511105	0.01102
TMEM108	chr3:134239942-134597745	0.011115
ADD3	chr10:111691018-111885310	0.011149
MAP2K5	chr15:65622074-65886506	0.011229
VEGFA	chr6:43845925-43862202	0.011249
FBXW11	chr5:171221160-171366482	0.011319
HSPA12B	chr20:3661355-3681758	0.011358
SHMT1	chr17:18159318-18207581	0.011373
RXRB	chr6:33269342-33276410	0.011375
MMS19	chr10:99208070-99248503	0.011421
C20orf30	chr20:5028485-5041733	0.011437
MTRF1	chr13:40688515-40735713	0.011473
KIAA1199	chr15:78858766-79031172	0.011493
VPS37A	chr8:17148850-17197438	0.011504
NF2	chr22:28329562-28424583	0.011533
ALMS1	chr2:73466393-73690554	0.011633
DGKQ	chr4:942675-957344	0.011637
C1QTNF3	chr5:34023068-34160396	0.011644
SUMO1	chr2:202779154-202811567	0.011726
TAF5	chr10:105117713-105146213	0.011736
PEX7	chr6:137185415-137276752	0.01179
AMT	chr3:49429215-49441761	0.011957
ATG4A	chrX:107221589-107284549	0.012043
